# Supplementary material for: Co-expression Network and Prognosis Analyses of Pyroptosis-related Genes in Non-small Cell Lung Cancer
Source: Research Square preprint supplement (doi:10.21203/rs.3.rs-627404/v1), 2021-06-24
Supplement: Supplementary file 1 [file 1ab600c8afca6366947e93b1.xlsx]

## Sheet: Sheet1
Cancer	Up_DEGs	Down_DEGs	Total
LUAD	1933	2918	4851
LUSC	2875	3638	6513

## Sheet: LUAD
GeneID	log2FoldChange	lfcSE	stat	pvalue
TSPAN6	-1.12222	0.101855	-11.0178	3.13569e-28
TNMD	-1.43027	0.465489	-3.07262	0.00212188
C1orf112	-1.70419	0.0965741	-17.6465	1.0828e-69
FGR	2.10145	0.134843	15.5845	9.28351e-55
GCLC	-2.26326	0.218481	-10.3591	3.8069e-25
CFTR	1.30439	0.248148	5.25651	1.46818e-07
HS3ST1	-1.51664	0.165188	-9.18131	4.25881e-20
AOC1	-5.0108	0.296494	-16.9002	4.48584e-64
WNT16	-1.86672	0.291859	-6.39596	1.59543e-10
HECW1	-2.3581	0.189969	-12.4131	2.21889e-35
CYP26B1	1.07925	0.173949	6.20439	5.49088e-10
ICA1	-1.16596	0.097838	-11.9172	9.62384e-33
DBNDD1	-2.00091	0.11926	-16.7778	3.54945e-63
MTMR7	-1.22759	0.236312	-5.19477	2.04971e-07
SLC7A2	-1.03101	0.261871	-3.93711	8.24701e-05
FKBP4	-1.16816	0.115181	-10.1419	3.59859e-24
HSPB6	2.43876	0.189628	12.8608	7.48265e-38
ARHGAP33	-1.32383	0.155967	-8.48788	2.10445e-17
PDK4	2.43719	0.191104	12.7532	2.9914e-37
ZMYND10	1.93078	0.246404	7.83583	4.65773e-15
ARX	-1.60439	0.3124	-5.13567	2.81134e-07
SLC25A13	-1.04623	0.0868642	-12.0444	2.07569e-33
SLC4A1	3.48019	0.215355	16.1603	9.61215e-59
CALCR	-1.36429	0.262695	-5.19342	2.06462e-07
PRSS22	-1.67431	0.158785	-10.5446	5.38298e-26
HOXA11	-4.1895	0.473968	-8.83919	9.64136e-19
MEOX1	1.15816	0.215328	5.37859	7.50722e-08
REXO5	-1.02471	0.105322	-9.72937	2.25993e-22
PON1	-1.69095	0.246917	-6.84824	7.47654e-12
ABCB4	-2.03107	0.189269	-10.7311	7.27034e-27
ITGAL	1.21419	0.136877	8.87066	7.27125e-19
CRLF1	-4.02788	0.325048	-12.3916	2.90071e-35
YBX2	-4.76504	0.27854	-17.1072	1.31077e-65
TMEM132A	-2.03772	0.143648	-14.1855	1.12692e-45
CX3CL1	1.04827	0.192803	5.43697	5.41934e-08
CACNA1G	-1.23488	0.232958	-5.30087	1.15253e-07
DLX6	-5.02631	0.443808	-11.3254	9.82216e-30
BAIAP2L1	-1.22806	0.103084	-11.9131	1.01125e-32
ETV1	1.21542	0.156423	7.77012	7.84131e-15
CCL26	-1.26641	0.239153	-5.29539	1.18765e-07
USH1C	-3.54383	0.36391	-9.73821	2.07179e-22
GGCT	-1.69615	0.10423	-16.2732	1.52991e-59
DBF4	-1.38878	0.110129	-12.6105	1.84899e-36
ARHGAP44	1.63458	0.144951	11.2768	1.70891e-29
SCIN	-1.49126	0.219392	-6.7972	1.06668e-11
PROM1	-1.43575	0.305458	-4.70033	2.59736e-06
CEACAM21	1.5894	0.156507	10.1555	3.1329e-24
DNAH9	2.01181	0.342929	5.86655	4.44948e-09
GAS7	1.12078	0.126988	8.82593	1.08556e-18
MATK	1.10147	0.147041	7.49092	6.83938e-14
CEACAM7	-3.59484	0.303144	-11.8585	1.9441e-32
SCN4A	-3.04767	0.303913	-10.0281	1.14714e-23
PAX6	1.38092	0.125581	10.9962	3.98574e-28
CACNA2D2	2.36313	0.249888	9.45676	3.17621e-21
SELE	2.93807	0.224316	13.0979	3.38475e-39
FMO3	1.15653	0.163219	7.08577	1.3827e-12
NOX1	-1.30545	0.145727	-8.95819	3.30062e-19
E2F2	-2.3566	0.146935	-16.0384	6.8956e-58
CDKL5	1.14477	0.101462	11.2827	1.59753e-29
TFAP2D	-7.03111	0.585691	-12.0048	3.3528e-33
DLEC1	1.06613	0.24061	4.43095	9.38199e-06
CELSR3	-3.38306	0.17656	-19.1609	7.84833e-82
PLEKHG6	-1.71519	0.152428	-11.2525	2.25203e-29
MGST1	-1.00272	0.139315	-7.19747	6.13392e-13
PGLYRP1	2.12229	0.2387	8.89105	6.05336e-19
NFIX	1.44085	0.146587	9.8293	8.41982e-23
MAPK8IP2	-1.46162	0.201239	-7.2631	3.78331e-13
TENM1	-2.17567	0.318116	-6.83923	7.96189e-12
PAX7	-7.94157	0.581107	-13.6663	1.61424e-42
IYD	-1.34673	0.272053	-4.95024	7.41212e-07
NCAPD2	-1.04545	0.109234	-9.57077	1.06114e-21
SEMA3G	3.19576	0.138219	23.1209	2.85067e-118
SLC6A13	2.63004	0.225765	11.6494	2.30979e-31
PRSS3	-4.75616	0.352532	-13.4914	1.75648e-41
BTK	1.40751	0.130246	10.8065	3.20535e-27
FMO1	-1.2362	0.186645	-6.62325	3.51394e-11
SLC6A7	-1.04348	0.196796	-5.30232	1.14342e-07
ANOS1	2.82945	0.165293	17.1178	1.09401e-65
DPF1	-1.17792	0.197783	-5.95559	2.59132e-09
SYT7	-3.46698	0.19754	-17.5508	5.86502e-69
ANLN	-3.7701	0.176488	-21.3618	3.03221e-101
DCN	1.49346	0.146573	10.1892	2.21556e-24
TYROBP	1.46517	0.143961	10.1776	2.49723e-24
GABRA3	-6.08929	0.505427	-12.0478	1.99158e-33
BRCA1	-1.44362	0.130893	-11.029	2.76797e-28
SEMA3B	1.51815	0.196847	7.71233	1.23544e-14
LTF	-1.31025	0.28159	-4.65305	3.27062e-06
NR1H4	-1.0788	0.414616	-2.60194	0.00926994
ALOX5	1.84127	0.140111	13.1416	1.90271e-39
CALCOCO1	1.20098	0.0825093	14.5557	5.36949e-48
CLDN11	1.25792	0.206341	6.09635	1.0852e-09
SLC25A39	-1.23518	0.0833381	-14.8213	1.06634e-49
DDX11	-1.48594	0.122764	-12.104	1.00537e-33
GPRC5A	1.2982	0.153494	8.45764	2.72838e-17
TACC3	-1.67836	0.117474	-14.2871	2.63379e-46
MTMR11	-1.42251	0.141945	-10.0215	1.22628e-23
DPEP1	-2.00707	0.223705	-8.97193	2.91358e-19
NPC1L1	-4.01613	0.326113	-12.3151	7.5077e-35
ISL1	-4.07489	0.468306	-8.70134	3.27997e-18
IL20RA	1.71111	0.19196	8.91388	4.92753e-19
SLC11A1	1.82842	0.148225	12.3354	5.83796e-35
WWTR1	1.03837	0.0957355	10.8462	2.07787e-27
ATP1A2	2.30216	0.206562	11.1451	7.56479e-29
VSIG2	1.364	0.247521	5.51066	3.5749e-08
MARCO	3.01168	0.221924	13.5708	5.96804e-42
CYP24A1	-6.74516	0.318458	-21.1807	1.43781e-99
PRDM11	1.18474	0.0921779	12.8527	8.30437e-38
SYT13	-4.17646	0.401254	-10.4085	2.26748e-25
SLC7A9	-2.82204	0.291792	-9.6714	3.98873e-22
CPS1	-6.6809	0.425889	-15.687	1.85757e-55
C8B	2.63092	0.341979	7.69321	1.43488e-14
FHL1	3.42091	0.174433	19.6117	1.2292e-85
NLRP2	-1.20644	0.276795	-4.35861	1.30893e-05
GRAMD1B	-1.23093	0.22956	-5.3621	8.22596e-08
ABCC2	-4.88542	0.35871	-13.6194	3.06967e-42
GCLM	-1.04878	0.155993	-6.72324	1.77728e-11
EHD2	1.26039	0.120302	10.4769	1.10333e-25
DEPDC1	-3.8101	0.182612	-20.8645	1.12676e-96
HSD17B6	2.23924	0.226153	9.90148	4.10178e-23
VIM	1.18679	0.114582	10.3576	3.86592e-25
CD44	1.03836	0.121179	8.5688	1.04567e-17
KCNG1	-1.41704	0.262505	-5.39813	6.73401e-08
AGPAT4	1.1622	0.119093	9.75874	1.6924e-22
SLAMF7	-1.13592	0.170506	-6.66206	2.70018e-11
PRKCH	1.10328	0.0761351	14.4911	1.37839e-47
INSRR	-2.0494	0.287592	-7.12607	1.03273e-12
ARNTL2	-2.447	0.197845	-12.3682	3.88268e-35
ANK1	-1.12602	0.218827	-5.1457	2.66524e-07
IBSP	-4.60028	0.33019	-13.9322	4.03608e-44
HMGB3	-3.51518	0.17609	-19.9624	1.16976e-88
MUSK	1.88187	0.216513	8.69172	3.56993e-18
ARHGAP31	2.16671	0.124054	17.4659	2.60577e-68
PNPLA6	1.5472	0.079891	19.3664	1.48393e-83
CHPF2	-1.01701	0.07684	-13.2354	5.4789e-40
FUT8	-1.40294	0.11426	-12.2786	1.18053e-34
GAB2	1.03283	0.106096	9.73487	2.14081e-22
APBA2	-2.0113	0.186032	-10.8116	3.03493e-27
EFCAB1	2.04328	0.300262	6.80498	1.01062e-11
MYOC	4.49815	0.307516	14.6273	1.88006e-48
FAM136A	-1.18714	0.0706958	-16.7922	2.784e-63
DEPDC1B	-3.58565	0.172332	-20.8067	3.76347e-96
DAPK2	1.93827	0.142943	13.5597	6.94252e-42
MYOM2	1.51715	0.160824	9.4336	3.96233e-21
OTC	3.65568	0.295721	12.3619	4.20054e-35
USP2	1.05366	0.171637	6.13888	8.31057e-10
CASR	-1.53586	0.395244	-3.88586	0.000101969
FLT4	1.33047	0.122541	10.8573	1.84013e-27
NSUN2	-1.02112	0.0845051	-12.0835	1.29044e-33
METTL1	-1.39021	0.110011	-12.6369	1.32081e-36
HOXC8	-2.73234	0.297545	-9.18294	4.19489e-20
TLL1	1.6251	0.160793	10.1068	5.15294e-24
VCAN	-1.65481	0.172391	-9.59917	8.05942e-22
MSR1	2.32824	0.164805	14.1273	2.57911e-45
RIPOR1	1.24475	0.0956625	13.0118	1.04777e-38
C6	2.01639	0.30048	6.71056	1.93872e-11
SOX30	-1.59723	0.249144	-6.41086	1.44704e-10
SPDL1	-1.29067	0.0967868	-13.3352	1.44456e-40
CDH10	1.16746	0.332458	3.5116	0.00044542
TNC	-1.52565	0.214574	-7.11013	1.15937e-12
ADAM28	-2.2156	0.164773	-13.4464	3.23236e-41
BARX2	-3.90509	0.243504	-16.0371	7.03939e-58
ZIC2	-5.24561	0.385168	-13.619	3.08678e-42
ADRB1	3.14545	0.231633	13.5794	5.30343e-42
DSG2	-1.41558	0.135158	-10.4735	1.1431e-25
GPM6B	2.0104	0.148011	13.5828	5.06778e-42
PREX2	2.025	0.154054	13.1447	1.82533e-39
ARAP2	1.26995	0.109246	11.6248	3.08475e-31
CP	-3.4831	0.221705	-15.7105	1.28164e-55
ANO2	2.25214	0.156887	14.3552	9.88097e-47
ARHGAP6	2.39959	0.129522	18.5265	1.2627e-76
TNFRSF17	-1.83241	0.214174	-8.5557	1.17158e-17
GUCA1A	-4.51303	0.370021	-12.1967	3.23725e-34
CELF2	1.22708	0.124194	9.88039	5.0634e-23
COL9A2	-1.97735	0.199232	-9.92486	3.24556e-23
UTS2	-1.14563	0.267369	-4.28481	1.82892e-05
TNFRSF9	-1.31907	0.178698	-7.38157	1.56435e-13
EPN3	-3.0905	0.157604	-19.6092	1.29049e-85
NEDD4L	1.0044	0.123158	8.1554	3.48035e-16
FOXP3	-1.86428	0.136084	-13.6995	1.02264e-42
DKK3	1.10518	0.139782	7.9065	2.64733e-15
NFE2L3	-1.3611	0.136787	-9.95051	2.50884e-23
LAMC3	1.65171	0.164559	10.0372	1.04617e-23
RAD51	-2.2035	0.141238	-15.6014	7.12455e-55
POLQ	-3.25338	0.171563	-18.9632	3.43487e-80
MSMO1	1.09485	0.105382	10.3893	2.7746e-25
FSTL4	-2.56674	0.284388	-9.02548	1.78914e-19
ENTPD2	-2.19048	0.216067	-10.1379	3.74913e-24
PTPRN	-3.60777	0.31397	-11.4908	1.46699e-30
CBLN4	1.255	0.233858	5.36652	8.02719e-08
CHRDL2	-1.43058	0.230546	-6.2052	5.4627e-10
KCNH2	-1.49966	0.246909	-6.07372	1.24982e-09
CCDC85A	2.84347	0.176421	16.1175	1.9221e-58
NPFFR2	-3.41575	0.430715	-7.93041	2.18417e-15
PHF21B	-1.37111	0.298234	-4.59742	4.27749e-06
GYG2	-2.26068	0.155798	-14.5103	1.04247e-47
DCBLD2	-1.04424	0.177643	-5.87828	4.14551e-09
SERPINB3	-2.41743	0.436942	-5.53262	3.15483e-08
PKP2	-1.39455	0.232013	-6.01066	1.84764e-09
F7	-2.91499	0.323041	-9.02359	1.82022e-19
TMCC3	1.02034	0.12686	8.04301	8.76575e-16
RASGRF1	2.07838	0.249109	8.34326	7.22713e-17
CAMK2B	-2.57408	0.297068	-8.66494	4.51751e-18
ALDH18A1	-1.62234	0.0781226	-20.7665	8.69327e-96
SLC2A3	1.09136	0.164236	6.64506	3.03091e-11
STYK1	-2.56999	0.157493	-16.3181	7.33389e-60
RIMBP2	-2.42717	0.355309	-6.83114	8.42401e-12
COL11A1	-6.20176	0.296757	-20.8984	5.53372e-97
PRDM6	1.02129	0.139821	7.30428	2.7876e-13
SPAG4	-2.90954	0.141497	-20.5625	5.9484e-94
CDH3	-2.78507	0.205618	-13.5449	8.49722e-42
ARSF	1.48254	0.21544	6.88145	5.92453e-12
VMP1	-1.24225	0.096648	-12.8534	8.23165e-38
CASP8	-1.39691	0.0684624	-5.79744	6.73353e-09
LIMCH1	1.64188	0.128555	12.7717	2.35808e-37
DLX3	-2.21072	0.233868	-9.45284	3.29758e-21
TSPAN32	1.17518	0.159992	7.34525	2.05376e-13
WISP2	2.17101	0.166867	13.0104	1.06796e-38
DMRT3	-1.92722	0.370902	-5.19603	2.03593e-07
EYA2	-1.83852	0.264489	-6.95119	3.62217e-12
FAR2	1.26148	0.149021	8.46509	2.55959e-17
BCAS1	-2.21389	0.271341	-8.15906	3.37655e-16
POU1F1	1.31863	0.200344	6.58182	4.64718e-11
CHI3L2	1.722	0.219043	7.86145	3.79709e-15
CALCRL	2.80547	0.132874	21.1138	5.94236e-99
ANKS1A	1.0702	0.0767736	13.9397	3.6335e-44
GLP2R	1.12293	0.323183	3.47459	0.000511644
MCM10	-3.53705	0.177891	-19.8832	5.68426e-88
MYLK	1.28492	0.127443	10.0823	6.61854e-24
COL17A1	-4.59988	0.300118	-15.3269	5.05547e-53
PRKCQ	1.60285	0.147798	10.8449	2.10952e-27
MTHFD2	-1.50737	0.128473	-11.733	8.62924e-32
SLC9A7	-1.16094	0.111673	-10.3959	2.58898e-25
CTNNA2	-1.09646	0.357118	-3.07031	0.00213839
TIE1	1.95227	0.119939	16.2771	1.43422e-59
SLC9A3	-2.25343	0.243076	-9.27049	1.85289e-20
NGEF	-3.00681	0.216998	-13.8564	1.16381e-43
ASPM	-3.67276	0.170484	-21.5432	6.13591e-103
SPI1	1.57047	0.13295	11.8125	3.36565e-32
CLDN18	3.59301	0.354865	10.125	4.27968e-24
FGFR2	1.79524	0.174721	10.2749	9.14754e-25
EML1	1.70727	0.128192	13.3181	1.81674e-40
KIF26A	1.43271	0.192534	7.44132	9.9685e-14
ACSM2B	1.26494	0.376523	3.35953	0.000780754
MTFR1	-1.2411	0.108095	-11.4816	1.63182e-30
STAG3	-1.18629	0.184937	-6.41456	1.41227e-10
PFKP	-2.15581	0.147951	-14.571	4.29261e-48
KLF6	1.82629	0.106868	17.0892	1.78538e-65
PHKA1	-1.64919	0.0999243	-16.5043	3.41416e-61
SYT1	-1.61812	0.248879	-6.50164	7.94515e-11
PDZD4	1.04677	0.197125	5.31018	1.09515e-07
HYAL2	1.26911	0.0796232	15.939	3.40016e-57
PRR11	-2.25299	0.154118	-14.6186	2.13854e-48
REEP1	1.65735	0.214073	7.74196	9.7898e-15
RASGRP2	1.15312	0.151572	7.60772	2.78963e-14
PYGM	1.18079	0.153448	7.695	1.41493e-14
PITX1	-4.57842	0.263807	-17.3552	1.8027e-67
ADGRF5	1.11749	0.183092	6.10342	1.0382e-09
KCNAB2	1.07858	0.110445	9.76575	1.57939e-22
ABCC9	1.04503	0.155814	6.70692	1.98781e-11
GAL	-4.86865	0.360099	-13.5203	1.18665e-41
MAOB	1.51082	0.167994	8.99333	2.39852e-19
RORA	1.2448	0.116834	10.6545	1.66201e-26
TGFBR3	2.63408	0.156796	16.7994	2.46431e-63
PLA2G10	-1.32047	0.257184	-5.13432	2.83168e-07
GUCY2C	-1.3492	0.186663	-7.22803	4.90063e-13
PFN2	-1.46234	0.173202	-8.44295	3.09433e-17
SPTB	-3.23757	0.26202	-12.3562	4.50888e-35
FGF10	2.99887	0.266097	11.2698	1.84887e-29
POLB	-1.12441	0.111221	-10.1097	5.0025e-24
ST6GALNAC1	-1.96448	0.203434	-9.65659	4.60974e-22
FRMPD1	1.4065	0.255295	5.50932	3.60219e-08
NDST1	1.59283	0.0864679	18.4211	8.89691e-76
ASNS	-1.69002	0.133226	-12.6853	7.13234e-37
CNGB1	-2.94201	0.251811	-11.6834	1.54981e-31
ST6GALNAC2	1.51658	0.169457	8.94961	3.56744e-19
PABPC1	-1.05545	0.096073	-10.986	4.46458e-28
PTPN21	2.4761	0.10792	22.944	1.69282e-116
CAMK2A	1.56416	0.173279	9.02682	1.76731e-19
EPHA8	-3.54689	0.415597	-8.53445	1.40822e-17
TRPM5	-2.33577	0.313034	-7.46171	8.54087e-14
VASH1	1.09756	0.102945	10.6617	1.53839e-26
LMCD1	1.76199	0.102506	17.1891	3.20264e-66
TRIP13	-2.51722	0.167358	-15.041	3.95694e-51
MYO3B	-3.49387	0.276171	-12.6511	1.1029e-36
CYBRD1	1.77996	0.145562	12.2282	2.19721e-34
CDH19	2.22641	0.289601	7.68787	1.49609e-14
SLC6A15	-3.01927	0.451123	-6.69279	2.18954e-11
SPP2	-6.75565	0.441463	-15.3029	7.31624e-53
LIMS2	2.78226	0.128266	21.6914	2.47289e-104
TFRC	1.06225	0.141331	7.51606	5.64536e-14
HMMR	-3.03842	0.159664	-19.0301	9.60459e-81
TRHDE	2.65019	0.302557	8.75931	1.96443e-18
CYP2W1	-1.15528	0.320383	-3.60594	0.00031103
MCM2	-2.01022	0.131931	-15.237	2.00946e-52
MOV10L1	-1.1946	0.20994	-5.69019	1.26895e-08
PANX2	-2.48707	0.1881	-13.2221	6.54243e-40
TP63	-1.00208	0.273591	-3.66268	0.000249586
GSDMB	-1.73453	0.148855	-11.6525	2.22943e-31
ADAM11	-1.15251	0.183317	-6.28697	3.23719e-10
FERMT2	1.44213	0.0925644	15.5797	9.99533e-55
ABCB11	-1.44617	0.308126	-4.69345	2.68636e-06
CD5L	4.09746	0.257619	15.9051	5.84186e-57
FRY	1.55833	0.118351	13.167	1.35869e-39
PPP2R2C	-5.03966	0.334895	-15.0485	3.53305e-51
CDHR2	-3.31959	0.295583	-11.2307	2.88341e-29
SNCB	-1.14586	0.289835	-3.95347	7.70255e-05
CA12	-1.6139	0.267902	-6.02421	1.69935e-09
NTN4	1.67034	0.133427	12.5188	5.89508e-36
SCARF1	1.1053	0.13059	8.4639	2.58579e-17
IPCEF1	-1.15006	0.198011	-5.80806	6.32004e-09
ENO1	-1.20497	0.089141	-13.5176	1.23146e-41
SLC12A1	1.51091	0.30108	5.01831	5.21294e-07
KCNQ2	-4.31036	0.432596	-9.96393	2.19216e-23
SEMA3A	-1.74655	0.225351	-7.75039	9.1611e-15
GTSE1	-3.1131	0.155419	-20.0304	2.993e-89
WNT8B	-1.12449	0.206923	-5.43434	5.49991e-08
WDR62	-2.36198	0.158097	-14.9401	1.80758e-50
TUBA3D	-1.10907	0.152825	-7.2571	3.95469e-13
MCM6	-1.46589	0.106923	-13.7098	8.87492e-43
RBMS2	1.25963	0.0834861	15.0878	1.9471e-51
SPAG5	-3.10282	0.14628	-21.2115	7.48119e-100
TPD52	-1.07358	0.12195	-8.80344	1.32683e-18
ACACB	1.35536	0.115628	11.7217	9.8623e-32
TRAF4	-1.35606	0.0849185	-15.969	2.10185e-57
NMRK2	1.22118	0.345969	3.52973	0.00041599
UBE2T	-3.30988	0.14465	-22.882	7.02298e-116
PAK3	-1.82543	0.278675	-6.5504	5.73817e-11
CAPN6	-1.00891	0.337888	-2.98591	0.00282732
SPAG6	1.60115	0.308108	5.1967	2.02857e-07
EXOSC5	-1.20571	0.103757	-11.6206	3.23894e-31
ACTN2	2.80112	0.205	13.664	1.66597e-42
NAALAD2	1.07998	0.128222	8.42273	3.67799e-17
SMC1B	-3.4892	0.284628	-12.2588	1.50703e-34
FBLN1	1.34951	0.146922	9.18519	4.10818e-20
ITGA8	2.14421	0.156383	13.7113	8.68993e-43
AMPH	-1.20506	0.2402	-5.01689	5.25149e-07
LAMP3	2.76339	0.18581	14.8721	5.00233e-50
FAP	-2.24139	0.164996	-13.5845	4.94898e-42
NEBL	1.68715	0.135427	12.458	1.26432e-35
SYNJ2	-1.48996	0.0996387	-14.9537	1.47429e-50
RBFOX1	-2.87265	0.51449	-5.5835	2.35732e-08
EDN1	2.03217	0.168546	12.0571	1.77951e-33
ADCYAP1R1	2.15361	0.180435	11.9357	7.71076e-33
FGF20	-2.20014	0.31234	-7.04406	1.8672e-12
ITM2A	2.02812	0.137428	14.7577	2.74511e-49
BRINP1	-1.2276	0.363799	-3.37439	0.000739796
BPIFB2	-4.85312	0.439325	-11.0468	2.27273e-28
RUNX1T1	1.41714	0.141374	10.0241	1.19498e-23
CDH17	-5.32388	0.355909	-14.9585	1.37017e-50
OSBPL6	1.55931	0.17506	8.90728	5.23017e-19
TNS1	2.17969	0.122011	17.8647	2.22264e-71
CDC14A	1.12464	0.103893	10.825	2.62115e-27
CEACAM1	-2.06848	0.148127	-13.9643	2.57524e-44
DUSP13	-6.10921	0.38649	-15.8069	2.78851e-56
PAFAH1B3	-2.25725	0.118632	-19.0273	1.01247e-80
KIF22	-1.18367	0.0850028	-13.925	4.46397e-44
EPB41L2	1.44727	0.112321	12.8851	5.45759e-38
PTPRH	-5.17904	0.239661	-21.6099	1.45091e-103
EPHA6	-2.13018	0.332085	-6.41454	1.41247e-10
SESN1	1.67032	0.0987788	16.9097	3.81334e-64
PIH1D3	2.22706	0.347481	6.40915	1.4633e-10
CPB2	2.6702	0.346345	7.70966	1.26157e-14
IGSF9B	-1.59623	0.223611	-7.13842	9.44118e-13
NDC80	-3.12809	0.163933	-19.0815	3.59919e-81
CXCL2	2.41858	0.197593	12.2402	1.89575e-34
AFP	-4.55412	0.534596	-8.51881	1.61203e-17
COL4A4	1.22134	0.166984	7.31412	2.59075e-13
CDH7	-1.92616	0.39411	-4.88737	1.02193e-06
ARG2	-1.15601	0.170918	-6.76356	1.3464e-11
CACNA1S	3.32083	0.317848	10.4479	1.49855e-25
PKP1	-2.27515	0.328442	-6.9271	4.2954e-12
IL12RB2	-1.43446	0.211584	-6.77961	1.20497e-11
PGR	1.82994	0.169494	10.7965	3.57657e-27
EPB41L3	1.12399	0.142822	7.86985	3.55073e-15
KCNK2	-1.68701	0.310463	-5.43386	5.5148e-08
TRAF5	-1.28428	0.112703	-11.3953	4.41435e-30
OPRK1	-2.05976	0.393711	-5.23166	1.67998e-07
P2RX5	-1.31226	0.187772	-6.98858	2.77674e-12
EPYC	-5.26511	0.385001	-13.6756	1.42076e-42
FAT1	-1.09781	0.14528	-7.55648	4.14109e-14
HAL	-2.66481	0.260352	-10.2354	1.37571e-24
SLCO1A2	2.81829	0.370261	7.61162	2.70672e-14
NKAIN1	-4.41252	0.323479	-13.6408	2.28928e-42
APOB	-1.01015	0.312433	-3.23316	0.00122429
EFR3B	1.12908	0.18555	6.08506	1.16446e-09
KIF3C	-1.0963	0.152298	-7.19839	6.09268e-13
GCKR	-3.03683	0.285835	-10.6244	2.29411e-26
CAD	-1.11979	0.0963083	-11.6272	2.99833e-31
FCN1	1.77048	0.18386	9.6295	6.0021e-22
OVGP1	-1.55519	0.160698	-9.67773	3.7495e-22
PILRA	1.51305	0.129461	11.6873	1.47967e-31
IGSF9	-3.26248	0.164394	-19.8455	1.20565e-87
ABCB1	1.6698	0.15894	10.5059	8.11879e-26
WNT11	1.05197	0.203041	5.18107	2.20622e-07
ORC1	-2.74383	0.155959	-17.5933	2.77123e-69
RAD54L	-3.28566	0.161498	-20.345	5.1459e-92
AQP6	-2.9087	0.302685	-9.60965	7.27977e-22
EIF2AK1	-1.0017	0.0644809	-15.5348	2.01727e-54
ITPKC	1.18294	0.118766	9.96021	2.27588e-23
CEACAM6	-1.40527	0.205262	-6.84626	7.58041e-12
FAT2	-2.08368	0.298872	-6.9718	3.12907e-12
ERO1B	-1.12475	0.187407	-6.00163	1.95351e-09
HSD17B2	-1.51155	0.316929	-4.76935	1.84822e-06
PPEF1	-1.7547	0.19789	-8.86704	7.51155e-19
MYBPC2	-1.58077	0.218226	-7.24376	4.36416e-13
NOX4	-1.27183	0.154956	-8.20767	2.25518e-16
PPP1R15A	1.85267	0.104173	17.7846	9.30885e-71
ACHE	-2.48154	0.23823	-10.4165	2.08391e-25
TMPRSS11E	-6.69719	0.337074	-19.8686	7.60839e-88
CETP	1.27442	0.11525	11.0579	2.00679e-28
PTHLH	-2.77748	0.256141	-10.8435	2.14066e-27
TFAP2C	-1.20582	0.135927	-8.87109	7.24305e-19
AURKA	-2.64567	0.154193	-17.1582	5.46084e-66
CASS4	1.93543	0.136682	14.1601	1.61797e-45
RFX2	1.63898	0.128547	12.75	3.11865e-37
DNMT3B	-2.05264	0.16704	-12.2883	1.04668e-34
REM1	1.63232	0.13128	12.4338	1.71293e-35
TPX2	-3.63839	0.172509	-21.0911	9.60555e-99
SLC15A1	-4.01196	0.322291	-12.4483	1.42919e-35
DOCK3	-1.61057	0.203362	-7.91971	2.38061e-15
TMEM40	-1.35194	0.235259	-5.74663	9.1041e-09
SMOX	-1.51367	0.157088	-9.63584	5.6429e-22
SIGLEC1	1.22744	0.162391	7.5585	4.07752e-14
SLC4A11	-1.90776	0.208518	-9.14915	5.73809e-20
C20orf194	1.29441	0.0866877	14.9319	2.04477e-50
CPXM1	-2.02155	0.183355	-11.0253	2.8842e-28
F11	2.73909	0.32257	8.49146	2.04052e-17
TESC	-3.6255	0.270115	-13.422	4.49213e-41
SIRPG	-1.44571	0.164228	-8.80304	1.33163e-18
P2RX7	1.01228	0.138919	7.28685	3.17285e-13
CFAP61	1.78202	0.246004	7.24387	4.36063e-13
LHX5	-5.29473	0.479739	-11.0367	2.54203e-28
OAS1	-1.20376	0.150619	-7.9921	1.32657e-15
RPH3A	1.88887	0.232121	8.13743	4.03749e-16
CHGB	-4.42061	0.376053	-11.7553	6.6343e-32
TBX5	1.51361	0.133093	11.3726	5.72779e-30
NOS1	1.74523	0.343694	5.07785	3.81733e-07
CMTM1	-1.13692	0.114213	-9.95433	2.41435e-23
KCNH4	-1.08047	0.180231	-5.99494	2.03555e-09
BIRC5	-3.68678	0.174679	-21.106	6.99922e-99
LAG3	-1.29446	0.175696	-7.36763	1.73691e-13
OTUB2	-1.23356	0.119365	-10.3344	4.92631e-25
LTBP4	2.19289	0.130787	16.767	4.25682e-63
LYZ	1.04462	0.209745	4.98045	6.34381e-07
TFAP4	-1.25089	0.0808061	-15.4801	4.72478e-54
FETUB	-4.09145	0.474949	-8.61449	7.02525e-18
P3H2	1.89202	0.215077	8.79696	1.40569e-18
THPO	-3.09941	0.274419	-11.2945	1.39752e-29
CHRD	-1.34058	0.197777	-6.77821	1.21677e-11
KIF4A	-3.82628	0.168083	-22.7642	1.03924e-114
PLEKHG2	-1.00535	0.144139	-6.97486	3.06167e-12
DLL3	-6.70277	0.402354	-16.6589	2.60924e-62
POU4F3	-1.35633	0.291315	-4.65588	3.22599e-06
DTX2	-1.29352	0.1116	-11.5907	4.593e-31
NLRC4	2.11948	0.120894	17.5318	8.19844e-69
PUS7	-1.25734	0.0921871	-13.639	2.34606e-42
SLC26A4	-1.7988	0.287974	-6.24641	4.20002e-10
SLC26A3	1.94105	0.288179	6.73557	1.63283e-11
IL5RA	2.14549	0.23764	9.02834	1.74292e-19
RAPGEF4	1.85864	0.128108	14.5084	1.07183e-47
SMPX	-2.65724	0.325713	-8.15824	3.39935e-16
TF	-3.32912	0.346331	-9.61253	7.0787e-22
ORC6	-3.0525	0.146802	-20.7934	4.97042e-96
ZFHX4	-1.60742	0.242206	-6.63656	3.21085e-11
CPA1	1.25986	0.317267	3.97097	7.15816e-05
RGS17	-3.6554	0.197372	-18.5204	1.41495e-76
CMA1	1.85647	0.240925	7.70558	1.30255e-14
JPH4	2.58268	0.149311	17.2973	4.92804e-67
MYH7	-2.74501	0.39437	-6.96049	3.3909e-12
TGM1	2.4081	0.171949	14.0047	1.4585e-44
DAZL	-1.67368	0.341555	-4.90017	9.57515e-07
SEMA6A	2.60905	0.151861	17.1805	3.718e-66
WDR76	-1.12316	0.113165	-9.92489	3.24455e-23
TBX15	-3.74071	0.237337	-15.7612	5.75302e-56
COL9A3	-1.78096	0.1965	-9.0634	1.26441e-19
TEKT2	1.60721	0.257362	6.24495	4.2393e-10
CLSPN	-2.71226	0.167323	-16.2097	4.30381e-59
DPYSL2	1.58218	0.114913	13.7685	3.94073e-43
TGFB2	1.08914	0.187224	5.81732	5.97991e-09
CDC45	-3.16807	0.163875	-19.3322	2.88048e-83
ADA2	1.03388	0.124861	8.28026	1.22905e-16
XYLB	-1.56321	0.108512	-14.4059	4.75345e-47
GABRP	-1.92598	0.323077	-5.96137	2.50136e-09
CDC6	-3.43004	0.160665	-21.349	3.98418e-101
FMO2	3.29657	0.168592	19.5536	3.84784e-85
SH2D3C	2.26846	0.107993	21.0057	5.81571e-98
TBC1D2	1.02102	0.129734	7.87008	3.54425e-15
TLL2	-2.83443	0.228523	-12.4033	2.50862e-35
CYP26A1	-2.66944	0.340835	-7.83205	4.79968e-15
TDRD1	-2.51123	0.320609	-7.8327	4.77509e-15
SORBS1	1.62388	0.124263	13.068	5.01584e-39
CRTAC1	2.56158	0.25219	10.1574	3.07238e-24
BAMBI	-1.12943	0.229455	-4.92225	8.55547e-07
IL11	-2.72377	0.230539	-11.8148	3.27418e-32
MYO3A	-1.08318	0.321007	-3.37431	0.000740018
TPSD1	1.25713	0.28298	4.44249	8.89235e-06
SMIM24	-3.92091	0.325174	-12.0579	1.76272e-33
SRPK1	-1.56348	0.0793783	-19.6966	2.30747e-86
NCR2	-1.62002	0.350861	-4.61727	3.8883e-06
DSP	-2.18118	0.177588	-12.2823	1.12797e-34
CDC7	-1.24836	0.126323	-9.88227	4.96941e-23
SYDE2	1.05587	0.136673	7.72547	1.11442e-14
PCSK5	1.04015	0.141551	7.34821	2.00882e-13
PRTFDC1	-1.29946	0.136047	-9.55155	1.27774e-21
PALMD	2.06842	0.136907	15.1082	1.42972e-51
FBXL19	-1.20484	0.0948007	-12.7092	5.25874e-37
EFNA2	-5.74022	0.417732	-13.7414	5.73637e-43
CBARP	-1.95831	0.176728	-11.081	1.55216e-28
HCN2	-2.34991	0.222296	-10.5711	4.05747e-26
CDHR5	-2.69309	0.345328	-7.79865	6.25742e-15
IZUMO4	-1.07668	0.161874	-6.65131	2.90494e-11
GADD45B	1.74817	0.133842	13.0615	5.46675e-39
MMP11	-5.52437	0.253934	-21.7552	6.17255e-105
P2RX6	1.29543	0.208998	6.1983	5.70766e-10
DERL3	-2.23324	0.167206	-13.3562	1.08969e-40
SUSD2	2.00088	0.250018	8.00293	1.21493e-15
SEC14L2	-1.03301	0.148901	-6.93759	3.98836e-12
SEC14L3	3.04321	0.353636	8.60549	7.59891e-18
PPM1F	1.26657	0.0776557	16.3101	8.37082e-60
MFNG	1.51628	0.104827	14.4646	2.02663e-47
CARD10	-1.58038	0.126048	-4.60447	4.13525e-06
PLA2G3	1.49502	0.277715	5.38329	7.31383e-08
PIK3IP1	1.0272	0.0998129	10.2912	7.71856e-25
GCAT	-1.14004	0.12719	-8.96328	3.15175e-19
GGTLC2	1.44923	0.270184	5.36388	8.14518e-08
TTC28	1.29036	0.104165	12.3876	3.04976e-35
SLC16A8	-2.22658	0.205494	-10.8353	2.34269e-27
CENPM	-1.76084	0.140846	-12.5019	7.29144e-36
43346	-1.51113	0.203149	-7.43856	1.0179e-13
SLC5A4	1.91989	0.176652	10.8682	1.63424e-27
KDELR3	-2.23437	0.127776	-17.4866	1.81189e-68
CYP2D6	-1.87539	0.202112	-9.27894	1.71167e-20
RSPH14	1.45034	0.246311	5.88825	3.90317e-09
TIMP3	1.89537	0.167898	11.2888	1.4906e-29
MIOX	-4.12106	0.315705	-13.0535	6.06657e-39
NEFH	-2.35896	0.307933	-7.66064	1.85009e-14
BIK	-2.01429	0.162817	-12.3715	3.72727e-35
CBX7	1.64247	0.109936	14.9402	1.80492e-50
PDGFB	1.47649	0.121898	12.1124	9.07446e-34
ACR	1.46402	0.185744	7.88195	3.22306e-15
CABP7	-1.81414	0.221498	-8.19032	2.60525e-16
APOL4	1.11954	0.145909	7.67282	1.68257e-14
PNPLA5	-4.9816	0.554219	-8.98851	2.50609e-19
CACNA1I	-2.07421	0.245135	-8.46151	2.63941e-17
PVALB	1.28644	0.214581	5.9951	2.03366e-09
CSF2RB	1.02353	0.131725	7.77014	7.83979e-15
UPK3A	-3.14205	0.280531	-11.2003	4.06132e-29
MLC1	1.28657	0.2046	6.28822	3.21133e-10
KCNK10	-1.96444	0.353427	-5.55827	2.72468e-08
CTSG	1.84042	0.238859	7.70505	1.30789e-14
COCH	-3.71657	0.252333	-14.7288	4.20851e-49
POLE2	-2.32539	0.13784	-16.8702	7.45103e-64
CDKL1	1.24916	0.129553	9.64204	5.31231e-22
TRIM9	-2.77178	0.272326	-10.1782	2.48178e-24
GNPNAT1	-1.4631	0.114517	-12.7763	2.22484e-37
CDKN3	-2.89318	0.174398	-16.5895	8.29767e-62
CCDC198	-5.47923	0.448914	-12.2055	2.90492e-34
PLEK2	-2.72667	0.156157	-17.4611	2.83402e-68
LRRC74A	1.3335	0.198737	6.70986	1.94805e-11
ISM2	-2.79785	0.365283	-7.65939	1.86819e-14
SIX4	-1.88783	0.134488	-14.0372	9.22412e-45
GALNT16	1.34871	0.203785	6.61831	3.6333e-11
SERPINA4	-8.0783	0.554747	-14.5621	4.8912e-48
SLC8A3	1.58964	0.195348	8.13744	4.03734e-16
DHRS2	-1.43012	0.274877	-5.20277	1.96337e-07
NFKBIA	1.02246	0.115006	8.89049	6.08397e-19
EMC9	-1.03141	0.0979462	-10.5304	6.25689e-26
NFATC4	-1.19946	0.120549	-9.95001	2.52153e-23
MMP9	-2.01564	0.202227	-9.96721	2.12099e-23
VSX1	-3.82199	0.331987	-11.5125	1.1417e-30
GINS1	-3.04583	0.150007	-20.3045	1.1723e-91
SGK2	-2.61537	0.218577	-11.9654	5.39272e-33
MYBL2	-3.82022	0.195651	-19.5257	6.64392e-85
HNF4A	-2.8545	0.384642	-7.42119	1.16072e-13
RAB5IF	-1.1594	0.105398	-11.0002	3.8136e-28
RIMS4	1.58555	0.317173	4.99902	5.76219e-07
PABPC1L	-2.15634	0.160073	-13.471	2.31842e-41
SALL4	-3.40362	0.197123	-17.2665	8.41085e-67
DOK5	-2.21643	0.208924	-10.6088	2.7123e-26
TUBB1	2.72286	0.173283	15.7134	1.22404e-55
NTSR1	-3.09188	0.377381	-8.193	2.54792e-16
MRGBP	-1.14516	0.0853765	-13.4131	5.07002e-41
SLC17A9	-2.51613	0.18771	-13.4044	5.70175e-41
NKAIN4	-3.16903	0.278512	-11.3784	5.35485e-30
COL20A1	-1.55902	0.368432	-4.23151	2.3213e-05
CHRNA4	1.88487	0.341004	5.52741	3.24988e-08
EEF1A2	-6.40198	0.328353	-19.4972	1.15894e-84
PTK6	-1.74954	0.170207	-10.2789	8.76968e-25
SPEF1	1.41159	0.234029	6.03167	1.6227e-09
SEL1L2	2.58326	0.270765	9.54061	1.42001e-21
TRIB3	-1.31334	0.139816	-9.3934	5.80946e-21
RASSF2	1.26531	0.116907	10.8231	2.67441e-27
SLC52A3	-1.15362	0.146779	-7.85957	3.85445e-15
ANGPT4	4.21934	0.215889	19.544	4.63662e-85
RSPO4	2.26698	0.23424	9.67803	3.7386e-22
SIRPB1	2.85447	0.174083	16.3971	2.00463e-60
FERMT1	-3.20727	0.165594	-19.3682	1.43141e-83
CCM2L	2.48725	0.131229	18.9535	4.12892e-80
MYL9	1.69697	0.120209	14.1168	2.99309e-45
HCK	1.33631	0.143675	9.30094	1.39205e-20
SAMHD1	1.21178	0.104955	11.5458	7.7529e-31
PAK5	1.61329	0.328422	4.91226	9.00335e-07
OXT	-2.11567	0.318349	-6.64574	3.01688e-11
E2F1	-1.48128	0.139284	-10.6349	2.05015e-26
PXMP4	1.0532	0.142988	7.36567	1.7626e-13
CST4	-5.92252	0.444758	-13.3163	1.86203e-40
WFDC2	-1.79222	0.18279	-9.8048	1.0736e-22
PPP1R16B	1.18662	0.145032	8.18181	2.79613e-16
FAM83D	-2.27047	0.158141	-14.3573	9.59182e-47
EPPIN	1.47134	0.34548	4.25883	2.05503e-05
DNTTIP1	-1.52852	0.141426	-10.8079	3.15819e-27
SYNDIG1	-1.6366	0.199302	-8.21168	2.18118e-16
TNNC2	-3.05233	0.314856	-9.69436	3.18615e-22
CDH20	-1.40159	0.292431	-4.79288	1.64402e-06
SMAD7	1.09957	0.0861685	12.7607	2.71813e-37
NOL4	-1.1203	0.316329	-3.54158	0.000397746
CSTF2	-1.09205	0.0685786	-15.9241	4.31004e-57
MXRA5	-1.67068	0.17599	-9.49303	2.24412e-21
VSIG1	-3.82565	0.351612	-10.8803	1.43062e-27
GPR143	-1.17668	0.182553	-6.44569	1.15073e-10
TLR8	1.83838	0.17137	10.7276	7.55634e-27
CHRDL1	2.319	0.216772	10.6979	1.04124e-26
SRPX	1.77418	0.172852	10.2642	1.0219e-24
MCF2	-2.29297	0.300622	-7.62743	2.39477e-14
BMX	1.76241	0.220617	7.98856	1.36522e-15
ZC3H12B	1.19977	0.124545	9.6332	5.7895e-22
SCML2	-1.12547	0.181398	-6.20441	5.49013e-10
SLC35A2	-1.01026	0.0942458	-10.7194	8.25352e-27
RS1	3.7374	0.242097	15.4376	9.14137e-54
PCSK1N	-2.34489	0.26935	-8.70573	3.15526e-18
RAB40AL	-1.08825	0.257342	-4.22882	2.34923e-05
GATA1	1.76925	0.157353	11.2439	2.48284e-29
PHEX	1.29035	0.162602	7.93564	2.09411e-15
PCYT1B	1.97305	0.22687	8.69682	3.41315e-18
TIMP1	-1.55281	0.122373	-12.6892	6.78489e-37
GABRE	-1.08754	0.218335	-4.98107	6.32338e-07
PCDH11X	1.60874	0.316025	5.09053	3.57065e-07
ITIH6	-3.17502	0.370579	-8.56771	1.05559e-17
SRPX2	-2.29715	0.180211	-12.747	3.23994e-37
ZDHHC15	1.04595	0.177462	5.89393	3.77111e-09
CENPI	-2.71206	0.155173	-17.4777	2.11959e-68
DRP2	-3.08221	0.242139	-12.7291	4.07373e-37
TAF7L	-3.52067	0.321092	-10.9647	5.64858e-28
FGF14	1.36219	0.171076	7.96248	1.6862e-15
MLNR	-1.23661	0.311025	-3.97593	7.01058e-05
CAB39L	1.39873	0.105689	13.2345	5.54795e-40
ACP5	1.79727	0.127932	14.0487	7.84883e-45
SGCG	3.82382	0.207977	18.3857	1.7088e-75
RGCC	2.85749	0.123224	23.1894	5.81896e-119
OLFM4	-4.26244	0.448597	-9.5017	2.06493e-21
MSLN	-1.31954	0.316795	-4.16529	3.10957e-05
HSF4	-1.94575	0.180426	-10.7842	4.08916e-27
ELMO3	-1.15535	0.112085	-10.3078	6.4974e-25
TSNAXIP1	1.31427	0.208098	6.31562	2.69085e-10
CBLN1	-1.22625	0.308973	-3.96881	7.22331e-05
PLLP	1.48794	0.15659	9.50213	2.0565e-21
ZNF423	1.81769	0.138632	13.1116	2.82446e-39
MMP15	-1.05593	0.128921	-8.19045	2.60249e-16
NDRG4	2.02214	0.173256	11.6714	1.78461e-31
FA2H	-2.55042	0.198335	-12.8592	7.64017e-38
NECAB2	-2.43625	0.294445	-8.27402	1.29515e-16
WFDC1	1.88025	0.161377	11.6513	2.25934e-31
NME4	-1.43409	0.107981	-13.281	2.98334e-40
FOXF1	2.73169	0.134296	20.3408	5.60029e-92
HAGHL	-1.338	0.153838	-8.69747	3.39367e-18
SLC7A5	-2.69748	0.177271	-15.2167	2.73953e-52
RHBDL1	-3.21718	0.187654	-17.1442	6.93994e-66
MEFV	1.72767	0.156759	11.0212	3.01957e-28
CRYM	-1.07238	0.264521	-4.05405	5.03393e-05
SALL1	-5.67154	0.482238	-11.7609	6.21023e-32
TOX3	-2.81645	0.223935	-12.5771	2.82157e-36
QPRT	-1.56709	0.194484	-8.05768	7.77566e-16
KNOP1	-1.13789	0.0679944	-16.735	7.28508e-63
AQP9	1.64137	0.184087	8.91627	4.8224e-19
CORO2B	2.1624	0.156887	13.7832	3.21564e-43
RASL12	1.59124	0.12036	13.2207	6.66804e-40
AP3B2	-1.01601	0.259705	-3.91217	9.14705e-05
ACSBG1	1.58522	0.198817	7.97328	1.54513e-15
IGDCC4	-1.19192	0.154391	-7.72017	1.16174e-14
CEMIP	-2.10196	0.219351	-9.58265	9.4587e-22
ZNF106	1.35272	0.0844714	16.014	1.02028e-57
TGM5	-3.07704	0.340094	-9.0476	1.46138e-19
FAM189A1	2.13034	0.233586	9.12016	7.50111e-20
SCG3	-1.02934	0.322865	-3.18814	0.0014319
RHOV	-3.6674	0.253387	-14.4735	1.78127e-47
OIP5	-2.38484	0.162746	-14.6537	1.27504e-48
PDGFRL	-1.46789	0.148378	-9.89293	4.46772e-23
RP1	1.15554	0.26811	4.30995	1.63294e-05
CA2	1.5047	0.215265	6.98999	2.749e-12
TRPA1	-2.19785	0.281499	-7.80766	5.82586e-15
CALB1	-2.88854	0.365574	-7.90139	2.75804e-15
LAPTM4B	-1.44165	0.128854	-11.1883	4.65401e-29
PLAT	-1.63492	0.240887	-6.78708	1.14429e-11
DKK4	-2.71504	0.517097	-5.25054	1.51658e-07
ESRP1	-1.11333	0.0906019	-12.2881	1.04937e-34
WISP1	-2.13898	0.159801	-13.3853	7.37249e-41
STMN2	-1.846	0.297052	-6.2144	5.15202e-10
GSDMC	2.83421	0.0935348	-1.96099	0.0498798
TSTA3	-1.39859	0.110305	-12.6793	7.70185e-37
PYCR3	-1.40205	0.108079	-12.9725	1.7518e-38
ANXA13	-1.36567	0.336479	-4.05871	4.93442e-05
ARHGEF10	1.07137	0.105436	10.1614	2.94858e-24
MCM4	-2.21037	0.127122	-17.3878	1.02107e-67
FGL1	-7.43319	0.392255	-18.9499	4.42457e-80
KCNN4	-3.26599	0.19351	-16.8776	6.57271e-64
LHB	-2.17485	0.237496	-9.1574	5.3162e-20
TUBB4A	-2.32526	0.275053	-8.45383	2.81902e-17
KCNA7	-2.49699	0.324481	-7.69534	1.41121e-14
CKM	-3.0257	0.285238	-10.6076	2.74597e-26
RNASEH2A	-1.30968	0.109315	-11.9808	4.47901e-33
KLC3	-1.59902	0.198972	-8.03639	9.25266e-16
CD37	1.0979	0.135374	8.1101	5.05764e-16
AMH	-1.79723	0.275662	-6.51969	7.04542e-11
RETN	2.91984	0.261096	11.183	4.93764e-29
CLEC4M	4.46132	0.29095	15.3336	4.55743e-53
IL4I1	-1.92033	0.169712	-11.3152	1.10322e-29
NOVA2	2.40656	0.126356	19.0458	7.11632e-81
LILRA1	1.66436	0.133344	12.4817	9.39599e-36
ASF1B	-2.37619	0.134866	-17.6189	1.76555e-69
TNNT1	-3.24623	0.292605	-11.0942	1.33781e-28
EPHX3	-2.24049	0.175758	-12.7476	3.21624e-37
SLC1A6	-1.42667	0.378153	-3.77273	0.00016147
CCNE1	-3.23998	0.179124	-18.0879	3.96737e-73
CLC	1.33377	0.378846	3.5206	0.000430577
CNTD2	-4.30408	0.250889	-17.1553	5.73752e-66
GPI	-1.12569	0.0910303	-12.3661	3.98687e-35
PRX	3.3536	0.155613	21.5509	5.19725e-103
SHD	-1.16485	0.263523	-4.4203	9.85657e-06
FSD1	-2.4796	0.241026	-10.2877	8.00592e-25
OVOL3	-1.37044	0.217989	-6.28676	3.2416e-10
ZFR2	-1.91027	0.351304	-5.43766	5.39839e-08
APLP1	-1.49191	0.229339	-6.50524	7.75681e-11
DENND3	1.78033	0.100012	17.8013	6.9078e-71
CD79A	-2.01583	0.209255	-9.63336	5.78069e-22
NKG7	1.05721	0.179867	5.87773	4.15939e-09
CD33	1.45871	0.139365	10.4668	1.22676e-25
CEACAM5	-4.79696	0.312673	-15.3418	4.02025e-53
ATP1A3	-1.6251	0.217654	-7.46643	8.23987e-14
CNFN	-2.70956	0.190707	-14.208	8.17711e-46
GRIN2D	-2.54663	0.230747	-11.0365	2.54858e-28
SYNGR4	-4.39853	0.335469	-13.1116	2.82665e-39
CCDC114	1.06004	0.225226	4.70655	2.51943e-06
SIGLEC6	1.59957	0.193209	8.27898	1.24236e-16
SIGLEC5	1.5436	0.158901	9.71421	2.62279e-22
HAS1	3.34011	0.27503	12.1445	6.13257e-34
CAPS	1.24914	0.196281	6.36403	1.96522e-10
RASIP1	2.28261	0.125958	18.122	2.13699e-73
THEG	-3.39849	0.391784	-8.67439	4.15777e-18
MAST1	-3.27001	0.193492	-16.8999	4.50517e-64
JAK3	-1.10871	0.11415	-9.71278	2.65991e-22
SLC5A5	-3.19743	0.343173	-9.31726	1.19384e-20
KCNN1	-1.49651	0.210642	-7.10451	1.20751e-12
ISYNA1	-1.17703	0.131163	-8.97374	2.86605e-19
COMP	-2.90252	0.249527	-11.6321	2.83076e-31
UPK1A	-1.90452	0.346707	-5.49316	3.94806e-08
ATP4A	-2.46597	0.453924	-5.43256	5.55516e-08
MAG	2.06745	0.305095	6.77642	1.23193e-11
TMEM59L	-4.19353	0.320154	-13.0985	3.359e-39
HAMP	-1.23633	0.213371	-5.79428	6.86165e-09
LSR	-1.3999	0.113637	-12.319	7.15604e-35
HPN	-1.04987	0.188855	-5.55913	2.7112e-08
GRIK5	-1.59022	0.256902	-6.18998	6.01713e-10
CADM4	-1.01833	0.131971	-7.71628	1.19773e-14
AVL9	-1.02576	0.0778941	-13.1686	1.33082e-39
RUNDC3B	1.15043	0.194068	5.92799	3.06673e-09
TFPI2	-3.64054	0.330025	-11.0311	2.70525e-28
ITGB8	-1.26951	0.225295	-5.63489	1.75175e-08
DUS4L	-1.0829	0.0873898	-12.3916	2.90014e-35
DLX5	-2.45058	0.255404	-9.59489	8.40028e-22
STEAP1B	-2.36979	0.253463	-9.34966	8.79291e-21
MPP6	-1.02739	0.127297	-8.07077	6.98565e-16
GSDME	-1.50196	0.158165	-3.17365	0.00150535
ATP6V0A4	-2.02826	0.278532	-7.28195	3.29037e-13
CAV2	2.35291	0.158655	14.8303	9.33156e-50
CAV1	3.4114	0.184257	18.5144	1.58177e-76
MET	-1.23823	0.208261	-5.94558	2.75479e-09
WNT2	1.03275	0.16741	6.16898	6.8731e-10
HOXA1	-1.95236	0.243989	-8.00182	1.22593e-15
LFNG	-1.08372	0.153433	-7.06316	1.62755e-12
HOXA5	1.60925	0.135765	11.8532	2.07113e-32
ANKRD7	-2.07259	0.25615	-8.09129	5.90362e-16
TSPAN12	1.30266	0.123696	10.5311	6.20832e-26
HOXA13	-5.86178	0.592209	-9.89816	4.23986e-23
CPED1	2.08534	0.145449	14.3373	1.27903e-46
ABHD11	-1.44516	0.107176	-13.484	1.94326e-41
COBL	1.11154	0.164486	6.75769	1.40211e-11
PLEKHA8	-1.21862	0.0870223	-14.0036	1.48213e-44
STX1A	-3.06254	0.156907	-19.5183	7.68089e-85
GARS	-1.06092	0.0853844	-12.4252	1.90733e-35
CCL24	2.46455	0.239603	10.286	8.15144e-25
NPTX2	-2.52267	0.262871	-9.59661	8.26162e-22
PTPRZ1	-2.00688	0.307848	-6.51906	7.07502e-11
HYAL4	-1.12188	0.320405	-3.50144	0.000462752
AIMP2	-1.05589	0.085298	-12.3788	3.40323e-35
TFR2	-2.96682	0.165337	-17.9441	5.33752e-72
PPP1R17	3.14793	0.30355	10.3704	3.38066e-25
AP1S1	-1.14305	0.0956184	-11.9543	6.16588e-33
EZH2	-2.53987	0.126842	-20.0239	3.40761e-89
SFRP4	-1.10997	0.201247	-5.51547	3.47843e-08
MEST	-1.26705	0.118439	-10.6979	1.04122e-26
MEOX2	1.13404	0.175129	6.47549	9.45075e-11
POU6F2	-3.95784	0.371044	-10.6668	1.45574e-26
AGR2	-2.48443	0.205682	-12.079	1.36382e-33
LIMK1	-1.12693	0.102857	-10.9563	6.19966e-28
SLC1A1	2.21858	0.17827	12.445	1.48871e-35
LHX2	-4.76809	0.366029	-13.0265	8.64632e-39
OGN	2.22068	0.255954	8.67611	4.09552e-18
ECM2	1.303	0.135175	9.63937	5.45236e-22
LHX6	1.42433	0.145772	9.77094	1.50047e-22
PTGR1	-1.37302	0.176705	-7.77012	7.84102e-15
AMBP	-2.82464	0.322575	-8.75652	2.01372e-18
DNM1	-1.11911	0.148605	-7.53076	5.04466e-14
ENG	1.58863	0.11042	14.3872	6.23026e-47
AK1	1.14762	0.138653	8.27692	1.26397e-16
DOCK8	1.10802	0.121161	9.14503	5.96131e-20
ELAVL2	-3.407	0.337262	-10.1019	5.41553e-24
KCNT1	-1.24786	0.277301	-4.50003	6.79436e-06
CA9	-5.61152	0.320652	-17.5003	1.42444e-68
TYRP1	1.18006	0.225265	5.23857	1.61827e-07
MPDZ	1.04752	0.110185	9.50691	1.96403e-21
PIP5K1B	2.28054	0.177161	12.8727	6.41074e-38
SH3GL2	2.20551	0.334722	6.58909	4.42542e-11
PTGDS	1.68153	0.179442	9.37088	7.19305e-21
PDLIM1	1.04975	0.082905	12.6621	9.59355e-37
CXCL12	1.28528	0.149714	8.58492	9.09028e-18
PKD2L1	1.14804	0.196941	5.82933	5.56497e-09
PALD1	1.25925	0.114613	10.9869	4.41627e-28
CDH23	1.29568	0.151878	8.53106	1.45014e-17
VSIR	1.59183	0.0975296	16.3215	6.94597e-60
SPOCK2	3.18031	0.156218	20.3581	3.93213e-92
LIPA	1.26628	0.123683	10.2381	1.33879e-24
TLX1	-4.65497	0.511175	-9.10641	8.51567e-20
TWNK	-1.24451	0.0947864	-13.1297	2.22664e-39
NPM3	-1.70773	0.112363	-15.1983	3.62964e-52
NEURL1	-1.30229	0.275445	-4.72795	2.26795e-06
MAP3K8	1.16896	0.107778	10.846	2.08419e-27
DKK1	-2.43993	0.337558	-7.22819	4.89489e-13
UBE2S	-1.74413	0.146525	-11.9032	1.13858e-32
DNAJC12	-4.28592	0.25262	-16.9659	1.46811e-64
PPIF	-1.09958	0.0889112	-12.3672	3.93416e-35
PBLD	-1.0636	0.159323	-6.67572	2.46022e-11
CYP2C18	-1.46841	0.288721	-5.08591	3.65862e-07
KRT23	-1.90565	0.352357	-5.40831	6.36231e-08
RUNDC3A	-1.7147	0.237461	-7.22097	5.16195e-13
CSF3	4.69091	0.313651	14.9558	1.42661e-50
RAPGEFL1	-1.17065	0.162696	-7.19536	6.22979e-13
RGS9	2.47729	0.137473	18.0202	1.35229e-72
RNF43	-1.19327	0.13305	-8.96863	3.00219e-19
WNT3	-2.07968	0.133973	-15.5231	2.42061e-54
ASPA	2.68509	0.172304	15.5835	9.42873e-55
43347	1.51647	0.105161	14.4204	3.85284e-47
P2RX1	1.21174	0.149808	8.0886	6.03523e-16
TRIM16L	-1.90888	0.214753	-8.8887	6.18303e-19
CDK5RAP3	-1.01315	0.0974668	-10.3948	2.61736e-25
ENO3	-2.56261	0.243365	-10.5299	6.28965e-26
RASD1	-1.68235	0.2331	-7.2173	5.30293e-13
SLC6A4	6.12173	0.313428	19.5316	5.92033e-85
CPD	-1.36344	0.137884	-9.88836	4.67621e-23
ALDH3A1	-1.93519	0.344601	-5.61573	1.95729e-08
ICAM2	1.40414	0.108103	12.989	1.41327e-38
CCL7	-1.87228	0.265894	-7.04146	1.9023e-12
CCL2	1.50361	0.160582	9.3635	7.71403e-21
CCL1	-1.78677	0.334825	-5.33644	9.47914e-08
KRT32	-1.88549	0.346097	-5.44787	5.09762e-08
KAT2A	-1.71144	0.0971715	-17.6126	1.97305e-69
DLX4	-1.23052	0.163775	-7.51348	5.7576e-14
COL1A1	-2.90147	0.19187	-15.1221	1.15797e-51
SGCA	1.98854	0.173895	11.4353	2.78515e-30
ABCC3	-2.54587	0.156925	-16.2235	3.43887e-59
CACNG1	1.22918	0.302148	4.06814	4.73905e-05
HLF	1.4128	0.220667	6.40241	1.52939e-10
SLC16A6	1.25691	0.167362	7.5101	5.90807e-14
MAP2K6	-1.17517	0.176622	-6.65356	2.86081e-11
MYH1	1.14617	0.334768	3.42378	0.00061756
NAT9	-1.08119	0.0754419	-14.3314	1.39325e-46
PMP22	1.21737	0.109475	11.1201	1.0019e-28
CWH43	2.2774	0.377836	6.02749	1.66524e-09
ODAM	3.13375	0.310516	10.0921	5.98905e-24
NMU	-4.60589	0.269422	-17.0954	1.60544e-65
KIAA1211	-1.36551	0.182146	-7.4968	6.5396e-14
MAPK10	1.16536	0.17814	6.5418	6.07812e-11
UCP1	1.3761	0.272623	5.04763	4.47333e-07
GAB1	1.4382	0.0933517	15.4063	1.48558e-53
CPE	-1.00694	0.21171	-4.75624	1.97233e-06
WFS1	1.69886	0.0998967	17.0061	7.39666e-65
ANXA10	-5.73532	0.432486	-13.2613	3.88186e-40
GALNT7	-1.6803	0.107701	-15.6016	7.09747e-55
SOD3	1.03335	0.152385	6.78117	1.19207e-11
TRIM2	-1.33987	0.13776	-9.72614	2.3327e-22
SLC2A9	1.12251	0.111902	10.0312	1.11154e-23
NEIL3	-4.26624	0.221615	-19.2507	1.39398e-82
CLNK	-1.23229	0.172988	-7.12354	1.05192e-12
NKX3-2	-3.59546	0.328817	-10.9345	7.8816e-28
BST1	1.24879	0.13341	9.36054	7.93289e-21
HGFAC	-2.98598	0.286736	-10.4137	2.14719e-25
SNX25	1.24941	0.124331	10.0491	9.27507e-24
LRP2BP	1.86599	0.136146	13.7057	9.37968e-43
NCAPG	-3.20145	0.168577	-18.991	2.02253e-80
UGDH	-1.89709	0.173969	-10.9048	1.09374e-27
CRYAB	1.94555	0.159548	12.1941	3.34301e-34
CCDC34	-1.46576	0.128869	-11.374	5.63309e-30
ZBTB16	2.33497	0.257694	9.06101	1.29253e-19
CRTAM	1.09	0.161996	6.72854	1.71376e-11
B3GAT1	-2.27662	0.26174	-8.69803	3.37703e-18
P2RX3	-1.29097	0.254956	-5.06349	4.11639e-07
LPXN	1.11551	0.103066	10.8233	2.6705e-27
MS4A4A	1.19558	0.148264	8.06386	7.39199e-16
CCKBR	-1.02423	0.376842	-2.71793	0.00656918
HPX	-1.21729	0.226843	-5.36624	8.03949e-08
FOLR3	3.25607	0.306134	10.6361	2.02417e-26
GALNT18	1.41526	0.113697	12.4476	1.44094e-35
UPK2	-1.06236	0.253482	-4.19108	2.77628e-05
NECTIN1	-1.61607	0.142925	-11.3072	1.20954e-29
KIAA1549L	-1.84315	0.238254	-7.73606	1.02546e-14
SLC15A3	1.35095	0.122635	11.016	3.19853e-28
MDK	-3.0988	0.156707	-19.7745	4.93442e-87
SLC22A18	-1.42988	0.125628	-11.3819	5.14875e-30
SLC35F2	-1.87637	0.112669	-16.6537	2.84263e-62
C11orf21	1.33548	0.16692	8.00072	1.23694e-15
ELMOD1	1.73298	0.209521	8.27115	1.32678e-16
CALCA	-7.1086	0.534074	-13.3101	2.02114e-40
HPS5	1.15518	0.0699347	16.518	2.72106e-61
POU2AF1	-1.57153	0.200091	-7.85407	4.02743e-15
PTPN5	3.41674	0.23908	14.2912	2.48412e-46
VWF	2.30852	0.14707	15.6968	1.59121e-55
P3H3	-1.11395	0.146838	-7.58625	3.29297e-14
PPFIBP1	1.15655	0.106981	10.8108	3.06138e-27
CD69	1.18663	0.169474	7.00184	2.52629e-12
SELPLG	1.44695	0.122459	11.8158	3.23629e-32
ASIC1	-1.33134	0.165999	-8.02017	1.05601e-15
DAO	2.43823	0.216233	11.2759	1.72551e-29
IL23A	-2.10199	0.173787	-12.0952	1.1201e-33
CYP27B1	-2.34864	0.160086	-14.6711	9.8715e-49
LIN7A	2.55488	0.185217	13.794	2.77033e-43
KRT18	-1.18104	0.12248	-9.64273	5.27671e-22
ACSS3	1.64607	0.176707	9.31524	1.21682e-20
TNS2	1.39031	0.113646	12.2337	2.05368e-34
PPM1H	-1.04953	0.151052	-6.94814	3.70134e-12
SLC6A12	1.07163	0.163433	6.55696	5.49159e-11
FOXM1	-3.38624	0.17091	-19.813	2.29743e-87
PRR4	-1.03458	0.182098	-5.68148	1.33537e-08
RAD51AP1	-2.06907	0.151089	-13.6943	1.0975e-42
ALDH2	1.18112	0.125252	9.42996	4.10261e-21
ART4	2.27922	0.213735	10.6638	1.50389e-26
RASAL1	-4.04399	0.198234	-20.4001	1.67001e-92
ENDOU	1.64924	0.169292	9.74197	1.99653e-22
C12orf49	1.0596	0.0984127	10.7669	4.93161e-27
FZD10	-1.54213	0.318283	-4.84515	1.26516e-06
ADGRD1	1.28843	0.199261	6.46601	1.00622e-10
IFNG	-1.19326	0.251237	-4.74956	2.03858e-06
TIMELESS	-1.72441	0.109445	-15.7559	6.2518e-56
GAPDH	-1.73454	0.115399	-15.0308	4.61256e-51
NOP2	-1.11138	0.0922069	-12.0531	1.86723e-33
GNB3	-1.80553	0.163831	-11.0207	3.03769e-28
CDCA3	-3.1798	0.158642	-20.0439	2.2809e-89
TPI1	-1.12657	0.0935883	-12.0375	2.25687e-33
SLCO1B3	-6.92468	0.518214	-13.3626	1.00042e-40
APOBEC1	-6.81125	0.563814	-12.0807	1.33645e-33
RSPH4A	1.79275	0.258747	6.92857	4.25121e-12
MAK	1.0202	0.170727	5.97561	2.2923e-09
NEDD9	1.59035	0.148994	10.6739	1.34807e-26
ADTRP	2.14343	0.185433	11.5591	6.63983e-31
FAM184A	1.33203	0.17243	7.72505	1.11812e-14
GABRR2	-1.05721	0.170442	-6.2028	5.54676e-10
SERINC1	1.18481	0.0660152	17.9475	5.01882e-72
SASH1	1.88757	0.100726	18.7397	2.35103e-78
UST	1.08939	0.162145	6.71864	1.83428e-11
TULP1	-1.5245	0.225134	-6.7715	1.27451e-11
PHACTR1	2.30208	0.146469	15.7172	1.1526e-55
MDGA1	1.88247	0.150975	12.4687	1.10583e-35
CD83	1.69625	0.123203	13.768	3.97178e-43
RBM24	1.0825	0.242928	4.45605	8.34828e-06
TSPO2	-1.07688	0.207852	-5.181	2.20701e-07
FHL5	2.82606	0.168246	16.7972	2.56043e-63
KHDRBS2	1.81884	0.244983	7.42437	1.1332e-13
E2F3	-1.35928	0.086166	-15.7752	4.61063e-56
SIM1	-3.72936	0.51226	-7.28022	3.33285e-13
COL9A1	-2.06666	0.271957	-7.59922	2.97914e-14
WASF1	-1.26554	0.13492	-9.3799	6.60379e-21
GMNN	-1.35983	0.111186	-12.2302	2.14454e-34
EYA4	1.36924	0.261733	5.23145	1.68188e-07
SOBP	1.44553	0.161197	8.9675	3.03329e-19
NR2E1	-4.66269	0.426795	-10.9249	8.76453e-28
PERP	-1.01397	0.12329	-8.22428	1.96363e-16
PHACTR2	1.59547	0.100659	15.8502	1.40063e-56
EPM2A	1.25706	0.0778325	16.1509	1.11918e-58
UNC93A	-5.75261	0.500528	-11.4931	1.42911e-30
PACRG	2.04985	0.254838	8.04374	8.71405e-16
QKI	1.40208	0.0849051	16.5135	2.93405e-61
C6orf118	1.98329	0.349228	5.67908	1.35424e-08
MDFI	-1.46628	0.174136	-8.42033	3.75432e-17
BYSL	-1.23865	0.0994577	-12.454	1.32943e-35
GMDS	-1.48182	0.121371	-12.2091	2.78053e-34
TTK	-3.28317	0.171722	-19.1191	1.75042e-81
WISP3	-1.67154	0.261394	-6.39471	1.60851e-10
CLIC5	3.6259	0.210815	17.1994	2.68278e-66
LY86	1.38941	0.147018	9.45063	3.36791e-21
MEP1A	-1.08193	0.231231	-4.679	2.88282e-06
TBX18	-2.68263	0.340177	-7.88598	3.12073e-15
CEP72	-1.25521	0.110052	-11.4056	3.91969e-30
SEMA5A	2.5865	0.167729	15.4207	1.1883e-53
C7	1.81414	0.225448	8.04685	8.49503e-16
GHR	2.06708	0.170199	12.1451	6.09028e-34
KIF20A	-3.15412	0.147161	-21.4331	6.56443e-102
HBEGF	2.57279	0.154007	16.7057	1.19126e-62
PDE8B	1.55719	0.119385	13.0435	6.92356e-39
HAVCR1	-5.19879	0.340878	-15.2512	1.61644e-52
THBS4	-1.81029	0.269315	-6.72184	1.79442e-11
BTNL8	1.41015	0.305235	4.61988	3.83965e-06
LMNB1	-1.87487	0.123695	-15.1573	6.78413e-52
NPR3	1.8312	0.162403	11.2756	1.73114e-29
SLC27A6	2.42552	0.349848	6.93306	4.11819e-12
BRIX1	-1.22424	0.0973261	-12.5787	2.76433e-36
PRLR	-1.44796	0.259981	-5.56947	2.55513e-08
SLC12A7	-1.17284	0.119961	-9.77682	1.41586e-22
PCDH12	1.70323	0.112555	15.1324	9.89831e-52
NUP155	-1.29112	0.103234	-12.5067	6.85885e-36
LIFR	1.69548	0.145558	11.6481	2.34539e-31
CDX1	-1.80585	0.193203	-9.34688	9.02741e-21
DBN1	-1.16464	0.10714	-10.8703	1.59715e-27
KNG1	-2.72485	0.430536	-6.32896	2.46816e-10
HRG	-3.13552	0.411625	-7.61742	2.58793e-14
HGD	-3.8236	0.288766	-13.2412	5.07513e-40
RBP2	2.94189	0.283608	10.3731	3.28748e-25
KAT2B	1.18734	0.0941396	12.6126	1.79981e-36
BCHE	2.46664	0.214234	11.5137	1.12502e-30
SERPINI2	1.05216	0.268831	3.91383	9.08448e-05
LRRC31	-1.5815	0.286064	-5.52846	3.23047e-08
COL7A1	-3.15978	0.237932	-13.2802	3.0156e-40
ECT2	-2.15239	0.132441	-16.2517	2.17228e-59
HYAL1	1.88295	0.202736	9.28772	1.57622e-20
HHLA2	-2.28929	0.372625	-6.14369	8.06237e-10
FRMD4B	1.14194	0.0935353	12.2086	2.7958e-34
PODXL2	-3.25387	0.191065	-17.0301	4.91065e-65
UPK1B	-3.07579	0.475714	-6.46563	1.00878e-10
EFCC1	2.56534	0.14832	17.296	5.04294e-67
MRPL3	-1.02725	0.0747293	-13.7463	5.36276e-43
PLSCR4	1.47272	0.108292	13.5995	4.03128e-42
AADAC	1.38661	0.316108	4.38651	1.15184e-05
ARHGEF26	2.69214	0.13907	19.3582	1.73749e-83
VIPR1	3.22782	0.175343	18.4086	1.12119e-75
ZBTB47	1.08404	0.085977	12.6085	1.89544e-36
TNNC1	3.53367	0.200587	17.6167	1.83414e-69
CLCN2	-1.37645	0.0981073	-14.03	1.02114e-44
SLC4A3	-1.83604	0.179799	-10.2116	1.75927e-24
IL1A	1.43414	0.257619	5.56691	2.59294e-08
CCL20	-1.29478	0.268877	-4.8155	1.46831e-06
CENPA	-3.63019	0.183181	-19.8175	2.10106e-87
SLC30A3	-1.2911	0.255144	-5.06031	4.18584e-07
FNDC4	-1.96642	0.189053	-10.4014	2.44229e-25
REEP6	-2.26121	0.189892	-11.9079	1.0767e-32
GRB14	-1.58197	0.199566	-7.92706	2.24392e-15
TLX2	-2.71397	0.321471	-8.44234	3.1105e-17
SPTBN1	1.78099	0.09338	19.0725	4.27638e-81
ACADL	3.16505	0.235512	13.439	3.57238e-41
EFEMP1	1.60299	0.148843	10.7697	4.78511e-27
REG1A	-5.02059	0.642612	-7.81279	5.59374e-15
DNAH6	1.42076	0.230619	6.16063	7.2456e-10
IGFBP2	-1.54235	0.231864	-6.65198	2.89185e-11
OTX1	-3.36122	0.173656	-19.3556	1.82712e-83
HSPE1	-1.3015	0.0969704	-13.4217	4.5141e-41
PRKAG3	1.02754	0.25402	4.04512	5.2296e-05
WNT6	-1.87675	0.243911	-7.69438	1.42181e-14
IL1RL2	-2.28085	0.153556	-14.8535	6.60061e-50
IL1RL1	2.94405	0.277869	10.5951	3.14101e-26
IL18R1	1.58171	0.144678	10.9326	8.05346e-28
SLC9A2	-2.29147	0.306651	-7.47257	7.86456e-14
FHL2	-2.33134	0.160359	-14.5382	6.93738e-48
ABCB6	-2.03179	0.144519	-14.059	6.78363e-45
SLC5A7	1.3818	0.401419	3.44229	0.000576807
TPO	-1.85146	0.250722	-7.38451	1.53012e-13
PROC	-3.9359	0.259371	-15.1748	5.19204e-52
HPCAL1	1.07391	0.0947793	11.3306	9.25272e-30
ODC1	-1.30471	0.222618	-5.86078	4.60689e-09
QPCT	-2.64326	0.235419	-11.2279	2.97514e-29
DLX2	-2.93304	0.450686	-6.50794	7.61859e-11
LCT	-4.01998	0.358124	-11.2251	3.07002e-29
PLCL1	1.80013	0.117007	15.3849	2.06819e-53
SLC1A4	-1.11179	0.103566	-10.7351	6.96527e-27
KYNU	-1.20435	0.250885	-4.8004	1.58348e-06
PCYOX1	1.12591	0.0846994	13.293	2.54029e-40
KISS1R	-6.26457	0.341411	-18.3491	3.35861e-75
EPAS1	2.70084	0.111366	24.2519	6.30996e-130
CD207	-1.42521	0.298947	-4.76745	1.86575e-06
GRIN3B	1.16766	0.230815	5.05884	4.2181e-07
VAX2	-1.49704	0.20244	-7.39501	1.41392e-13
PARD3B	1.17524	0.112879	10.4115	2.19738e-25
BCL9	-1.31487	0.096419	-13.6371	2.41001e-42
DHCR24	1.01115	0.105158	9.61556	6.87375e-22
TNR	3.89463	0.252868	15.4018	1.59144e-53
RALGPS2	-1.58598	0.106015	-14.96	1.34054e-50
ANGPTL1	2.59804	0.17655	14.7156	5.11911e-49
KIAA1324	-1.18208	0.250047	-4.72741	2.27401e-06
OPRD1	-2.29758	0.259122	-8.86678	7.52942e-19
DLGAP3	-1.16815	0.203966	-5.72716	1.02125e-08
SRM	-1.04876	0.0886426	-11.8314	2.68663e-32
FBXO2	-1.17618	0.196097	-5.99797	1.998e-09
C1orf21	1.10657	0.133864	8.26642	1.38045e-16
LEPR	1.88	0.173622	10.8281	2.53236e-27
PRG4	3.04175	0.26034	11.6838	1.54318e-31
NCF2	1.69268	0.131154	12.9061	4.1583e-38
PLA2G4A	-2.4333	0.219144	-11.1037	1.20404e-28
RPE65	-1.36351	0.413715	-3.29578	0.000981486
CTH	-1.13723	0.138853	-8.19018	2.60826e-16
AGMAT	-2.61452	0.155212	-16.8448	1.14515e-63
CFHR3	-2.10263	0.231487	-9.08316	1.05469e-19
NR5A2	1.20003	0.151261	7.93354	2.1299e-15
NT5C1A	-2.30817	0.361506	-6.38488	1.71533e-10
BMP8B	-1.22547	0.125266	-9.78294	1.33286e-22
KMO	1.34819	0.139094	9.69262	3.24115e-22
AKT3	1.08223	0.131583	8.2247	1.95677e-16
ST6GALNAC5	2.25093	0.166938	13.4837	1.95195e-41
ADGRL2	1.92838	0.139831	13.7908	2.89484e-43
MFAP2	-1.55636	0.157053	-9.90974	3.77623e-23
KDM5B	-1.05071	0.0767641	-13.6875	1.20614e-42
ACTL8	-5.86112	0.587998	-9.96793	2.10572e-23
PLA2G2D	-1.15218	0.244982	-4.70312	2.56217e-06
KIF17	1.99463	0.126854	15.7238	1.03959e-55
GPR89A	-1.02885	0.0764722	-13.454	2.91791e-41
CD160	1.06662	0.13375	7.97469	1.52762e-15
GALE	-1.09085	0.105644	-10.3257	5.39439e-25
ID3	1.12227	0.125757	8.92408	4.49428e-19
CR2	-1.74764	0.261917	-6.6725	2.51486e-11
SLC2A1	-3.51457	0.186323	-18.8627	2.30916e-79
CDC20	-3.78711	0.170557	-22.2043	3.12013e-109
ARTN	-2.6482	0.215265	-12.3021	8.82662e-35
B4GALT2	-1.22862	0.0829644	-14.8091	1.2802e-49
CCDC181	1.20046	0.207232	5.79285	6.92034e-09
MROH9	2.51244	0.310267	8.09766	5.60253e-16
TNFSF4	-1.17905	0.143793	-8.19962	2.41142e-16
DARS2	-1.20427	0.0934439	-12.8876	5.28374e-38
PLPPR5	2.49571	0.302734	8.24393	1.66646e-16
STMN1	-1.04311	0.137694	-7.57559	3.57493e-14
NEK2	-3.73031	0.168266	-22.1691	6.82639e-109
CENPF	-3.46532	0.162867	-21.277	1.85402e-100
STX12	1.05386	0.0577728	18.2414	2.42101e-74
43161	1.45376	0.121482	11.9669	5.29883e-33
SLC5A9	2.60364	0.225747	11.5334	8.94962e-31
CD3EAP	-1.19063	0.0982558	-12.1176	8.51739e-34
CHRNB4	-3.45276	0.251643	-13.7209	7.61634e-43
MUC5B	-3.99937	0.353879	-11.3015	1.28946e-29
MMP8	-1.71385	0.297218	-5.76633	8.10183e-09
APOA1	1.75699	0.261927	6.70794	1.97395e-11
SLC8A2	-1.74995	0.2949	-5.93403	2.95581e-09
KIF14	-3.72812	0.171273	-21.7671	4.75389e-105
TTR	-2.73387	0.47429	-5.76413	8.20806e-09
CASC1	1.15414	0.210175	5.49132	3.98941e-08
ATP10B	-5.47492	0.273107	-20.0468	2.1535e-89
ELOVL4	-1.97547	0.233365	-8.46513	2.55866e-17
FILIP1	1.59146	0.177949	8.94333	3.77628e-19
CNR1	1.5598	0.208883	7.46735	8.18283e-14
ADGB	2.10195	0.336002	6.25576	3.95581e-10
PLAGL1	1.21897	0.137905	8.83917	9.64319e-19
TNFAIP3	1.17586	0.131596	8.93537	4.05804e-19
AKAP7	1.14634	0.102696	11.1625	6.22291e-29
SGK1	1.22134	0.130617	9.35054	8.72013e-21
ARG1	1.4722	0.178387	8.25285	1.54665e-16
CTGF	1.61145	0.148858	10.8254	2.6093e-27
TCF21	3.10845	0.194529	15.9794	1.77803e-57
CASQ2	2.7372	0.218184	12.5454	4.21272e-36
ABCG2	2.06331	0.141556	14.5759	3.99707e-48
SPP1	-4.77318	0.240953	-19.8096	2.4596e-87
PCDH17	1.74414	0.126264	13.8135	2.1138e-43
CCND2	1.2829	0.133382	9.61824	6.69642e-22
DNAH7	1.24359	0.211997	5.86607	4.46251e-09
SATB2	-1.27711	0.144372	-8.84591	9.07861e-19
GDA	-3.28494	0.374068	-8.78167	1.61061e-18
KLF9	1.72035	0.114124	15.0744	2.38791e-51
C2orf40	2.49982	0.278199	8.98573	2.57019e-19
C1orf198	1.21394	0.0866494	14.0098	1.35735e-44
TRIM67	-2.34377	0.235747	-9.94188	2.73602e-23
HEATR1	-1.03692	0.0786447	-13.1849	1.07193e-39
CTNNAL1	1.39499	0.102338	13.6312	2.61271e-42
HDHD3	-1.20924	0.0970318	-12.4623	1.19799e-35
SLC46A2	1.91517	0.259632	7.37647	1.62545e-13
NR4A3	2.28088	0.216295	10.5452	5.34466e-26
CSF3R	1.08277	0.194313	5.57228	2.51426e-08
ONECUT2	-4.9684	0.307269	-16.1695	8.27353e-59
VSX2	1.19768	0.324411	3.69186	0.000222618
PGF	-1.24645	0.157746	-7.90159	2.75366e-15
FLVCR2	1.29912	0.115179	11.2792	1.66299e-29
PPP4R4	1.77725	0.223329	7.95798	1.74867e-15
KLHL29	1.00485	0.152394	6.59377	4.28787e-11
LGALSL	1.83168	0.126664	14.4609	2.13833e-47
CNRIP1	1.4954	0.107899	13.8592	1.11946e-43
EPCAM	-1.63026	0.098951	-16.4754	5.51073e-61
NKX2-3	-1.49852	0.367732	-4.07503	4.6009e-05
CNNM1	-1.77479	0.268239	-6.61645	3.67934e-11
HELLS	-2.31978	0.133323	-17.3998	8.28492e-68
CFAP58	1.86342	0.226105	8.24138	1.70232e-16
SFRP5	2.60948	0.30979	8.42338	3.65765e-17
HOXB8	-3.37235	0.359693	-9.37564	6.87554e-21
CRHR1	-3.36687	0.441742	-7.6218	2.50163e-14
HOXB3	-1.38062	0.194629	-7.09359	1.30673e-12
DUSP1	1.56039	0.163991	9.51504	1.81642e-21
MSX2	-1.3908	0.207497	-6.70271	2.0459e-11
TEK	3.27218	0.14315	22.8585	1.20364e-115
MOB3B	1.07572	0.124595	8.6337	5.93985e-18
INSL6	-2.12916	0.482537	-4.41242	1.02221e-05
INSL4	-7.6327	0.663455	-11.5045	1.25233e-30
GRIA2	-1.39076	0.317997	-4.37352	1.22261e-05
CCDC170	1.6494	0.209035	7.89055	3.00846e-15
MYCT1	2.26167	0.115768	19.5362	5.40289e-85
ARAP3	1.33453	0.0947506	14.0846	4.72239e-45
CENPL	-1.38824	0.101263	-13.7093	8.92767e-43
TTLL2	-1.24589	0.24728	-5.03837	4.69503e-07
KCNJ5	1.77482	0.195315	9.087	1.01811e-19
TEX11	-3.43058	0.27941	-12.278	1.18959e-34
IQSEC3	2.57476	0.179185	14.3693	8.0675e-47
TNFSF11	-4.10239	0.270734	-15.1529	7.25247e-52
SOHLH2	-4.44273	0.36944	-12.0256	2.6075e-33
SMAD9	1.48136	0.174865	8.47143	2.42398e-17
EGR1	1.84472	0.171579	10.7514	5.83564e-27
SOCS2	1.96616	0.17328	11.3467	7.69946e-30
DUSP4	-2.44707	0.223465	-10.9506	6.60083e-28
SORBS3	1.1405	0.0944951	12.0695	1.53146e-33
CHRNA2	3.63534	0.312151	11.6461	2.40188e-31
ADRA1A	3.50401	0.296569	11.8152	3.25857e-32
PDLIM2	1.93585	0.103399	18.7222	3.2655e-78
RDH10	-1.36647	0.182647	-7.4815	7.34783e-14
TBX2	1.89603	0.133222	14.2321	5.79412e-46
TBX4	2.18963	0.165722	13.2127	7.41138e-40
TEX14	1.28119	0.13534	9.46647	2.89467e-21
NCAPH	-3.01612	0.159114	-18.9557	3.96209e-80
LRAT	-1.69012	0.218675	-7.72888	1.08493e-14
MND1	-2.89235	0.151395	-19.1047	2.30599e-81
TRIM6	-1.13944	0.158835	-7.17375	7.29714e-13
ABCC11	-1.99833	0.194982	-10.2488	1.19792e-24
PLBD1	1.06753	0.158988	6.71451	1.88694e-11
KCNJ8	1.20902	0.164886	7.33246	2.25971e-13
BCL2L14	-1.38333	0.177705	-7.78445	7.00189e-15
PDZRN3	1.13952	0.133918	8.50909	1.75297e-17
B4GALT4	-1.02189	0.107637	-9.49386	2.22633e-21
KIF18A	-1.36059	0.129954	-10.4698	1.18947e-25
CRY2	1.15904	0.0977744	11.8543	2.04543e-32
DEPDC7	-2.38378	0.209806	-11.3618	6.47721e-30
CAT	1.90173	0.101546	18.7278	2.93575e-78
PILRB	-1.12725	0.177033	-6.36749	1.92147e-10
GJB6	-5.1643	0.354908	-14.5511	5.74899e-48
GJA3	-1.95762	0.282021	-6.94138	3.88284e-12
ADGRB2	-1.54137	0.171411	-8.99224	2.42251e-19
CCRL2	1.5424	0.139947	11.0213	3.01617e-28
SLITRK3	1.29733	0.286495	4.5283	5.94604e-06
TMEM156	-2.44334	0.203205	-12.024	2.65793e-33
CSMD2	-1.70233	0.187394	-9.0842	1.04466e-19
HPCA	-2.39963	0.192183	-12.4862	8.88275e-36
UBL3	1.12346	0.0904452	12.4214	1.99954e-35
PAEP	-7.46033	0.425159	-17.5472	6.25395e-69
OBP2A	-3.12102	0.421746	-7.40024	1.35941e-13
CD244	1.35213	0.150979	8.95575	3.37443e-19
LDB3	1.62213	0.15992	10.1434	3.54678e-24
OPN4	-1.35737	0.369531	-3.67322	0.000239516
PTGFR	1.33465	0.251438	5.30808	1.10788e-07
CBX3	-1.04567	0.0772547	-13.5354	9.66601e-42
NXPH1	-4.42164	0.446294	-9.90744	3.8641e-23
RAMP3	3.19077	0.138688	23.0068	3.98239e-117
TWIST1	-2.46081	0.245603	-10.0195	1.25169e-23
GLIPR2	2.19929	0.126929	17.3269	2.94877e-67
RECK	1.5976	0.106981	14.9336	1.99341e-50
SPINK4	-5.78213	0.47926	-12.0647	1.62229e-33
TAF1L	-2.70185	0.358291	-7.54095	4.66575e-14
PHF24	1.16528	0.149034	7.81886	5.33041e-15
DNAI1	1.73668	0.299859	5.79164	6.97022e-09
CNTFR	2.42026	0.278972	8.67565	4.11212e-18
AKR1D1	-2.28533	0.325785	-7.01482	2.30245e-12
SFTPA1	2.80023	0.301214	9.2965	1.45147e-20
NEUROG3	-1.07953	0.389083	-2.77454	0.0055279
PLAU	-2.56538	0.199846	-12.8368	1.01983e-37
SRGN	1.0786	0.148924	7.24261	4.40135e-13
EGR2	1.85504	0.147219	12.6006	2.09605e-36
ZWINT	-2.61608	0.134559	-19.4419	3.41343e-84
CIT	-2.04106	0.210478	-9.69727	3.09683e-22
HVCN1	1.08585	0.10399	10.4418	1.59692e-25
RASSF8	1.33573	0.150282	8.88812	6.2151e-19
BHLHE41	1.03847	0.148846	6.97684	3.01897e-12
NECAB1	3.27278	0.181229	18.0588	6.72908e-73
PRDX4	-1.41232	0.114035	-12.3849	3.15351e-35
ADGRE5	1.26819	0.113182	11.2049	3.85996e-29
SPRYD7	1.26897	0.0774295	16.3888	2.30075e-60
NLN	-1.3956	0.0844688	-16.522	2.54699e-61
CENPK	-2.19631	0.14355	-15.2999	7.6553e-53
ITIH5	2.08218	0.192483	10.8175	2.84465e-27
NCKAP1L	1.30285	0.131417	9.91388	3.623e-23
MMP19	2.02727	0.157983	12.8322	1.08188e-37
SPATS2	-1.20769	0.0845025	-14.2918	2.46179e-46
NR4A1	1.73118	0.20202	8.56936	1.04061e-17
PDE1B	1.57917	0.144405	10.9357	7.78057e-28
HOXC13	-7.12587	0.508999	-13.9998	1.56405e-44
HOXC11	-6.96422	0.5193	-13.4108	5.22742e-41
SMUG1	-1.03014	0.0847885	-12.1496	5.76566e-34
STIL	-2.5286	0.12717	-19.8836	5.64752e-88
HJURP	-3.86253	0.173827	-22.2205	2.17793e-109
COL10A1	-4.59221	0.213757	-21.4833	2.2291e-102
PLP1	1.46138	0.285651	5.11597	3.12125e-07
NRK	-3.76484	0.286626	-13.135	2.07415e-39
LPGAT1	-1.04901	0.0907326	-11.5616	6.45091e-31
C4BPB	-2.17235	0.269929	-8.04786	8.42542e-16
CKS2	-1.06764	0.145435	-7.341	2.12006e-13
DAW1	1.06258	0.259477	4.09507	4.22042e-05
CHPF	-1.27382	0.108902	-11.6969	1.32155e-31
INHA	-5.93977	0.378326	-15.7001	1.50913e-55
MOGAT1	2.64178	0.267171	9.888	4.69296e-23
FAM124B	1.88306	0.132729	14.1873	1.09852e-45
SLC12A4	1.02704	0.0813585	12.6236	1.56464e-36
CTCFL	-1.55429	0.446386	-3.48194	0.000497804
PI3	-1.8618	0.312202	-5.96344	2.46983e-09
SLPI	1.23623	0.237626	5.20243	1.967e-07
WFDC3	-3.92574	0.240929	-16.2942	1.08601e-59
PREX1	1.25035	0.112422	11.1219	9.81308e-29
ARHGAP40	-3.70576	0.23201	-15.9724	1.98889e-57
PARD6B	1.131	0.106829	10.5871	3.42152e-26
PLCG1	-1.14189	0.0853733	-1.66196	0.0265204
TOX2	1.52992	0.145552	10.5112	7.67062e-26
GDAP1L1	-1.35854	0.278264	-4.88221	1.04902e-06
GTSF1L	-2.64934	0.332924	-7.95781	1.75107e-15
EDN3	2.70676	0.397609	6.80759	9.92448e-12
PTGIS	1.28093	0.183617	6.97606	3.03574e-12
RBPJL	-1.67242	0.334244	-5.0036	5.62697e-07
C20orf85	2.20684	0.376946	5.85454	4.78344e-09
KCNK15	-1.149	0.202333	-5.67877	1.35663e-08
PCK1	-2.43349	0.491319	-4.95298	7.30871e-07
ZBP1	-1.21902	0.160121	-7.61316	2.67468e-14
IL17C	-3.86122	0.326182	-11.8376	2.49416e-32
POF1B	-1.77507	0.248274	-7.14964	8.70027e-13
LYPD3	-3.48384	0.249056	-13.9882	1.84017e-44
CEACAM8	2.11622	0.359827	5.88122	4.07254e-09
NDP	-2.788	0.340638	-8.18464	2.73108e-16
GRM4	-2.69723	0.298395	-9.03914	1.57904e-19
PACSIN1	-2.48622	0.207069	-12.0067	3.27476e-33
XPO5	-1.02348	0.0802002	-12.7616	2.68576e-37
HIST1H1D	-3.70071	0.33347	-11.0976	1.28897e-28
UNC5CL	-3.12338	0.168677	-18.517	1.50675e-76
MOCS1	1.36234	0.115269	11.8188	3.12252e-32
HIST1H2BJ	-2.0214	0.221962	-9.10697	8.47151e-20
OR2B6	-3.66565	0.348074	-10.5312	6.20172e-26
SPDEF	-3.30556	0.205482	-16.0868	3.1549e-58
TCP11	-1.26769	0.326123	-3.88713	0.000101434
SOX4	-1.67175	0.104834	-15.9466	3.00661e-57
CPNE5	-1.23317	0.157179	-7.84565	4.30724e-15
NRN1	1.66336	0.180895	9.19518	3.74368e-20
RPP40	-1.54177	0.106632	-14.4588	2.20738e-47
RUNX2	-1.58917	0.12648	-12.5646	3.30572e-36
CXCL6	-1.14989	0.305488	-3.7641	0.00016715
EREG	-2.53099	0.362769	-6.97686	3.01845e-12
MYRF	1.62161	0.221091	7.33456	2.22449e-13
AHNAK	1.97752	0.141357	13.9896	1.80544e-44
WNT1	-1.41716	0.254274	-5.57335	2.49886e-08
PIWIL1	-5.08556	0.475907	-10.686	1.18332e-26
TMTC4	-1.18791	0.0957131	-12.4112	2.27361e-35
EFNB2	1.07208	0.139076	7.70862	1.27187e-14
SOX21	-2.67023	0.321387	-8.30844	9.69709e-17
C17orf53	-2.75334	0.150101	-18.3432	3.74221e-75
KIF25	-1.18696	0.206209	-5.7561	8.60803e-09
TMEM255A	1.10877	0.182082	6.08942	1.13323e-09
SOX9	-1.37905	0.219333	-6.28747	3.22672e-10
TEKT3	1.78291	0.210143	8.48429	2.17047e-17
MYH2	3.19552	0.250132	12.7753	2.25247e-37
MSTO1	-1.5058	0.0854438	-17.6233	1.63108e-69
C1orf61	-5.46236	0.346851	-15.7485	7.03723e-56
KIR2DL1	1.3779	0.313945	4.38898	1.13881e-05
SRMS	-2.48165	0.223381	-11.1095	1.12795e-28
IL1B	1.13624	0.174433	6.51389	7.32304e-11
IL37	-6.27284	0.40109	-15.6395	3.91924e-55
CD70	-1.23353	0.204831	-6.02221	1.7205e-09
FOSB	3.25389	0.281857	11.5445	7.87285e-31
SDCBP2	-1.61558	0.220334	-7.33238	2.26095e-13
GNRH2	-1.33754	0.296277	-4.51448	6.34712e-06
CD93	2.23529	0.122696	18.2181	3.70944e-74
PAX1	-1.29707	0.453978	-2.85711	0.00427512
CSTL1	-4.56333	0.481207	-9.4831	2.46839e-21
BMP2	1.77309	0.184318	9.61972	6.60122e-22
FLRT3	1.80676	0.181081	9.97762	1.90983e-23
PCSK2	-1.36666	0.446028	-3.06407	0.00218347
LAMP5	-1.51267	0.182486	-8.28922	1.13997e-16
MCM8	-1.35217	0.109418	-12.3578	4.42057e-35
TMEM74B	1.45548	0.156866	9.27853	1.71835e-20
SIRPD	2.23298	0.162776	13.7181	7.90592e-43
S1PR4	1.76748	0.130322	13.5624	6.68739e-42
F10	1.47999	0.172267	8.59123	8.60449e-18
PROZ	-1.1074	0.221488	-4.99983	5.73803e-07
PDCD2L	-1.50043	0.104347	-14.3792	6.99114e-47
KIRREL2	-3.68786	0.338093	-10.9078	1.05758e-27
HCST	1.0713	0.136391	7.85465	4.00881e-15
KRT36	-1.26319	0.249059	-5.07188	3.93914e-07
BCL2L12	-1.00731	0.0930264	-10.8282	2.53166e-27
RRAS	1.31158	0.108369	12.1029	1.01916e-33
FLRT1	-1.86769	0.188517	-9.9073	3.86978e-23
PRKCG	-2.55085	0.296211	-8.61159	7.20532e-18
TRAP1	-1.16689	0.0731132	-15.96	2.42692e-57
CFP	2.07083	0.147969	13.995	1.67169e-44
SIX1	-2.37663	0.199473	-11.9145	9.94594e-33
RHOJ	1.8817	0.10564	17.8124	5.66289e-71
DLGAP5	-3.67596	0.170951	-21.503	1.45973e-102
PZP	1.5221	0.275161	5.53166	3.17218e-08
PRDM7	-2.32771	0.374238	-6.21985	4.97616e-10
OMG	1.41092	0.245945	5.73672	9.65276e-09
AVPR2	1.94499	0.196222	9.91222	3.68355e-23
ARMCX1	1.04952	0.111085	9.44796	3.45498e-21
TIMM8A	-1.20688	0.0876481	-13.7696	3.88227e-43
RGS13	1.54896	0.194705	7.95539	1.78568e-15
FGD3	1.17399	0.112915	10.3971	2.55571e-25
EDN2	-1.84559	0.263966	-6.99176	2.71467e-12
TRAF2	-1.03855	0.0989361	-10.4972	8.89878e-26
MASP1	2.68489	0.191396	14.028	1.05134e-44
ATP13A4	1.34044	0.232714	5.76001	8.41102e-09
HRASLS	-2.81754	0.239088	-11.7845	4.6903e-32
TSPAN8	-2.13459	0.28916	-7.38206	1.55861e-13
BEST3	-2.19502	0.39134	-5.60898	2.0352e-08
PTPRB	2.66304	0.135978	19.5844	2.1007e-85
CRYGN	-3.23126	0.26606	-12.1448	6.11082e-34
AUNIP	-2.34999	0.161404	-14.5597	5.06789e-48
PLA2G5	1.2579	0.13145	9.56941	1.07513e-21
KLF2	1.7217	0.151495	11.3647	6.26492e-30
OR7C1	-1.15491	0.389063	-2.96843	0.00299321
F2RL3	1.8683	0.158138	11.8143	3.29145e-32
SYNGR3	-2.82109	0.211723	-13.3245	1.66855e-40
PKMYT1	-3.00399	0.154574	-19.434	3.98424e-84
FBXL16	-1.26434	0.212689	-5.94454	2.77231e-09
CHTF18	-1.82857	0.126016	-14.5106	1.03786e-47
GNG13	-1.41196	0.280578	-5.03233	4.84549e-07
MACF1	1.05447	0.0996964	10.5768	3.81751e-26
TUBA4A	-1.05744	0.122035	-8.66506	4.51274e-18
VIL1	-7.00065	0.384479	-18.2081	4.44798e-74
GNG11	1.70785	0.169244	10.091	6.05342e-24
GNGT1	-6.38426	0.438372	-14.5636	4.78848e-48
SGCE	1.09272	0.137223	7.96315	1.67711e-15
ZFP36	1.79289	0.159634	11.2312	2.86422e-29
SRD5A3	-1.59264	0.137757	-11.5613	6.47583e-31
SPINK2	-2.7642	0.264619	-10.446	1.52875e-25
PAICS	-1.8669	0.0956499	-19.5181	7.70943e-85
PPAT	-1.91342	0.102567	-18.6554	1.14246e-77
ADM2	-3.48739	0.152429	-22.8787	7.57005e-116
ASPHD2	-1.31755	0.151967	-8.67003	4.32025e-18
VPREB3	-1.96976	0.216069	-9.11636	7.76873e-20
SDF2L1	-1.13807	0.109488	-10.3945	2.62616e-25
MGAT3	3.03393	0.205733	14.7469	3.22077e-49
RFPL3	1.16476	0.23952	4.8629	1.15678e-06
APOL3	1.32338	0.127246	10.4002	2.47368e-25
MCHR1	-2.04927	0.210381	-9.74076	2.02033e-22
BAIAP2L2	-3.72692	0.241991	-15.4011	1.6095e-53
IGLL1	-2.81929	0.300884	-9.37001	7.25281e-21
APOBEC3A	1.2908	0.201474	6.40681	1.48597e-10
KRT17	-2.75117	0.304211	-9.04365	1.51532e-19
DOCK4	1.64843	0.103793	15.8818	8.46551e-57
CDHR3	1.44555	0.279376	5.17422	2.28861e-07
VGF	-4.10057	0.304465	-13.4681	2.40952e-41
PODXL	1.08905	0.103777	10.4942	9.18715e-26
STRIP2	-2.63251	0.209346	-12.5749	2.90233e-36
LRRC4	1.29633	0.195947	6.61569	3.69817e-11
FEZF1	-5.64253	0.322278	-17.5083	1.23921e-68
HOXD1	-1.45988	0.265138	-5.50613	3.66811e-08
PDE11A	-1.61715	0.240054	-6.73661	1.62126e-11
GAD1	-3.76118	0.250918	-14.9897	8.57223e-51
HOXD10	-1.46887	0.342787	-4.28508	1.82675e-05
CGNL1	2.23236	0.134784	16.5625	1.30009e-61
TMOD2	1.08988	0.105964	10.2853	8.20632e-25
ELL3	-1.17844	0.132804	-8.87353	7.08603e-19
MINDY2	1.05582	0.0784414	13.46	2.68785e-41
KNSTRN	-1.0591	0.117033	-9.04952	1.43595e-19
CHAC1	-1.00783	0.151826	-6.63809	3.17783e-11
LOXL1	-1.05676	0.132383	-7.98263	1.43252e-15
ACKR4	2.47786	0.19403	12.7705	2.39533e-37
BBOX1	-1.31906	0.272883	-4.83379	1.33955e-06
E2F8	-3.1698	0.150971	-20.9961	7.11945e-98
SOX15	-1.42597	0.210498	-6.77427	1.25032e-11
PIMREG	-3.18811	0.181714	-17.5447	6.53478e-69
CD68	1.59683	0.141595	11.2774	1.69635e-29
TXNDC17	-1.63394	0.123664	-13.2128	7.40539e-40
ATP1B2	1.54456	0.155755	9.91661	3.52532e-23
KIF1C	1.31152	0.0818686	16.0198	9.28994e-58
KLK14	-1.38347	0.356989	-3.87538	0.000106457
KLK8	-4.71223	0.510225	-9.23558	2.56881e-20
ADCY4	1.75858	0.115715	15.1975	3.67402e-52
FOXA1	-1.40793	0.150492	-9.35556	8.31561e-21
EGLN3	-3.05252	0.215619	-14.157	1.69099e-45
CDO1	2.68846	0.179104	15.0106	6.2571e-51
SEC14L1	1.02297	0.0884342	11.5676	6.01413e-31
AANAT	-1.0971	0.193421	-5.6721	1.41061e-08
ARHGEF6	1.47118	0.111376	13.2091	7.77206e-40
ART1	1.72622	0.281786	6.12601	9.01098e-10
CDKN1C	1.01689	0.133378	7.62415	2.45646e-14
SGO1	-3.20249	0.16387	-19.5428	4.74784e-85
CDH15	-2.18077	0.227925	-9.56792	1.09074e-21
PLPPR3	1.27755	0.270411	4.7245	2.30687e-06
LBP	-3.53381	0.4025	-8.77965	1.63991e-18
SYT5	-2.51044	0.327374	-7.6684	1.74159e-14
TNNI3	-2.83982	0.313964	-9.04506	1.4958e-19
CBFA2T3	1.09531	0.155661	7.03648	1.97161e-12
GAMT	-1.16442	0.140925	-8.26267	1.42453e-16
PRRG3	1.46458	0.181478	8.07029	7.0133e-16
KCNA5	2.28105	0.181289	12.5824	2.63781e-36
CRACR2A	-1.03272	0.160654	-6.42824	1.29086e-10
STARD8	2.21264	0.113237	19.5399	5.028e-85
FAM155B	-3.22271	0.232805	-13.843	1.40306e-43
GDPD2	-1.3549	0.245578	-5.51718	3.44486e-08
LDLR	2.12658	0.13051	16.2944	1.08174e-59
CNN1	1.49831	0.159728	9.38036	6.57458e-21
APOC1	1.40193	0.171894	8.15576	3.46978e-16
LRCH2	1.26731	0.179096	7.07612	1.48245e-12
DPP6	3.27714	0.21137	15.5043	3.24286e-54
ACE2	-1.50189	0.229509	-6.54392	5.99261e-11
ATP8B3	-1.34913	0.20118	-6.70611	1.99883e-11
NCAN	-2.42344	0.340906	-7.10881	1.17045e-12
KIF1A	-5.49806	0.412051	-13.3431	1.2988e-40
USHBP1	2.29505	0.121316	18.9179	8.11699e-80
EPO	-1.13754	0.281138	-4.0462	5.20564e-05
CACNG6	1.49253	0.353425	4.22305	2.41018e-05
UNC13A	-1.71368	0.243436	-7.03954	1.92872e-12
KLHDC7B	-1.81208	0.202556	-8.94606	3.68404e-19
GDF15	-1.47159	0.206973	-7.11006	1.15989e-12
IQCN	2.44308	0.185367	13.1797	1.14796e-39
JUND	1.42596	0.107183	13.304	2.19444e-40
SULT4A1	-3.90403	0.368856	-10.5842	3.52963e-26
SAMD10	-1.76277	0.106596	-16.537	1.98786e-61
TNNT3	1.59145	0.265772	5.98802	2.12414e-09
TNNI2	1.42718	0.20828	6.85219	7.27289e-12
COL5A1	-2.00465	0.164949	-12.1531	5.52166e-34
CALY	-2.75872	0.346277	-7.96681	1.62827e-15
CYP2E1	-1.48459	0.218794	-6.78535	1.15805e-11
MNX1	-4.32506	0.233647	-18.511	1.68241e-76
CEP85	-1.0582	0.0863678	-12.2522	1.63449e-34
GATA5	1.56161	0.193831	8.05655	7.84799e-16
RBBP8NL	-2.11964	0.141673	-14.9614	1.3119e-50
PRDM12	-3.18346	0.292291	-10.8914	1.26665e-27
GMFG	1.4707	0.120967	12.1579	5.21074e-34
ARHGEF16	-1.78322	0.106661	-16.7185	9.60605e-63
SMPDL3B	-1.88342	0.154185	-12.2153	2.57569e-34
THEMIS2	1.10858	0.106587	10.4007	2.46049e-25
SLC6A8	-1.89653	0.16744	-11.3266	9.68769e-30
PNCK	-2.88691	0.270439	-10.6749	1.33395e-26
DKC1	-1.13943	0.0756631	-15.0593	2.99996e-51
PLXNA3	-1.03567	0.111029	-9.32801	1.07882e-20
DUSP9	-4.58632	0.324337	-14.1406	2.13511e-45
ZNF331	1.21446	0.118463	10.2518	1.16103e-24
SLC7A10	-4.80457	0.345043	-13.9246	4.4936e-44
CASZ1	1.03475	0.114868	9.0082	2.09458e-19
AKAP12	1.02545	0.239706	4.27796	1.88615e-05
SYNE1	1.2797	0.135096	9.47253	2.73153e-21
EPS8L1	-1.29718	0.150377	-8.62622	6.34131e-18
TTLL9	1.09574	0.23865	4.59139	4.40299e-06
BPIFA2	-4.7774	0.3593	-13.2964	2.42842e-40
COX4I2	2.25147	0.145657	15.4574	6.73012e-54
C1QL1	-2.155	0.277805	-7.75725	8.67906e-15
GFAP	-3.09485	0.264396	-11.7054	1.19643e-31
HIGD1B	2.76105	0.158608	17.408	7.17428e-68
TEX101	-3.53594	0.431901	-8.18691	2.68017e-16
CCL25	-2.98837	0.309274	-9.66254	4.3495e-22
GINS2	-2.86438	0.157548	-18.181	7.29711e-74
SLC34A1	-1.63973	0.279894	-5.8584	4.67351e-09
F12	-2.85069	0.177214	-16.0861	3.19146e-58
PRR7	-1.44687	0.149219	-9.69633	3.1255e-22
NFATC1	1.15066	0.103638	11.1027	1.21671e-28
ADGRE3	2.93595	0.189046	15.5303	2.16403e-54
SH3BP5	1.40907	0.120535	11.6901	1.43172e-31
LRRC4B	1.30003	0.166927	7.78801	6.80751e-15
PDLIM4	-1.23738	0.189	-6.547	5.87057e-11
TUBG1	-1.17656	0.0922419	-12.7552	2.91593e-37
AOC3	2.63731	0.148149	17.8017	6.85254e-71
RAMP2	2.84595	0.126735	22.4559	1.12111e-111
TMEM204	1.89963	0.108543	17.5012	1.40235e-68
KREMEN2	-2.98778	0.225165	-13.2693	3.48846e-40
BARX1	-7.58159	0.42711	-17.7509	1.69644e-70
CA6	-2.81211	0.395661	-7.10739	1.18262e-12
TNS4	-3.96562	0.293948	-13.4909	1.76968e-41
TOP2A	-3.85122	0.162462	-23.7053	3.1756e-124
PIAS3	-1.06384	0.0824012	-12.9104	3.93048e-38
RAI2	2.12092	0.130056	16.3078	8.68755e-60
LIN28A	-4.34482	0.577604	-7.52214	5.38863e-14
RHPN2	-1.21752	0.146692	-8.29988	1.0422e-16
FAAP24	-1.24689	0.113982	-10.9394	7.46912e-28
PODNL1	-2.83669	0.207977	-13.6394	2.33391e-42
C19orf57	-1.32253	0.155615	-8.49876	1.91631e-17
RTBDN	-4.96585	0.377813	-13.1437	1.84988e-39
MATN3	1.50889	0.186156	8.10548	5.2536e-16
SLC6A11	-3.7245	0.366044	-10.175	2.56377e-24
PPARG	1.59422	0.174853	9.11751	7.68729e-20
NUP210	-1.10209	0.117692	-9.36418	7.66452e-21
FCRLA	-1.8201	0.225588	-8.06824	7.13173e-16
EMILIN2	1.15825	0.117054	9.89503	4.37488e-23
SLX1A	-1.39385	0.304188	-4.5822	4.60114e-06
CNGA4	1.92081	0.272712	7.04334	1.87687e-12
IQCA1	1.08925	0.203889	5.3424	9.17218e-08
RAMP1	-2.24128	0.1868	-11.9983	3.62637e-33
CARD6	1.78148	0.110144	7.09502	1.29333e-12
INPP5K	1.08288	0.0678856	15.9515	2.78218e-57
POPDC3	-1.32533	0.3389	-3.91069	9.2032e-05
FIGNL1	-1.5439	0.105961	-14.5705	4.32707e-48
DDC	-1.53473	0.345389	-4.44347	8.85195e-06
ITGB4	-1.69313	0.181593	-9.32377	1.12277e-20
SLC52A1	-1.09723	0.193512	-5.67011	1.42707e-08
RGS22	1.97436	0.235836	8.37175	5.67711e-17
REEP2	-1.0153	0.16896	-6.0091	1.86559e-09
HSPA12B	2.76581	0.123527	22.3904	4.88305e-111
PCNA	-1.1189	0.103117	-10.8508	1.97707e-27
RHBG	-4.65994	0.2787	-16.7203	9.33039e-63
KHDC4	-1.45699	0.0927767	-15.7043	1.41311e-55
NES	1.56191	0.146502	10.6614	1.54265e-26
BCAN	-2.83575	0.227067	-12.4886	8.61156e-36
CRP	-1.35572	0.409693	-3.30911	0.000935914
RAB25	-1.08467	0.112738	-9.62112	6.51208e-22
FCRL2	-1.91892	0.222043	-8.64208	5.51989e-18
ACY3	-2.93436	0.207114	-14.1678	1.44893e-45
ALDH3B2	-2.86466	0.226831	-12.629	1.4607e-36
TESMIN	-2.77506	0.208804	-13.2903	2.63535e-40
MMACHC	-1.02949	0.0737797	-13.9536	2.99132e-44
VSTM2L	-2.09187	0.223027	-9.37946	6.63084e-21
DMGDH	-1.76078	0.213608	-8.24305	1.67877e-16
BHMT2	-2.86517	0.292181	-9.80612	1.0596e-22
KANK4	1.31016	0.236895	5.53056	3.19203e-08
ANGPTL3	-2.78462	0.325166	-8.56369	1.09308e-17
SLC14A2	-4.08584	0.4095	-9.97764	1.90957e-23
NMUR2	1.00608	0.355111	2.83315	0.0046092
TPTE2	-2.41203	0.252232	-9.56275	1.14666e-21
ALOX5AP	1.97103	0.154682	12.7424	3.43622e-37
WASF3	1.93929	0.144392	13.4307	3.99548e-41
GPR12	-1.95607	0.434452	-4.50239	6.7194e-06
MYH10	1.52568	0.119334	12.785	1.98938e-37
CHI3L1	-1.29864	0.231056	-5.62043	1.90481e-08
MYBPH	-3.31111	0.328142	-10.0905	6.08818e-24
DCLK1	-1.14234	0.18076	-6.31968	2.62107e-10
CCNA1	1.17022	0.270888	4.31996	1.5606e-05
RXFP2	2.86522	0.36806	7.78466	6.99025e-15
TRPC4	1.08166	0.134503	8.04192	8.84439e-16
POSTN	-1.60012	0.171363	-9.33755	9.85843e-21
STOML3	2.03823	0.338958	6.01322	1.81871e-09
KL	2.29748	0.210651	10.9066	1.07207e-27
STARD13	2.05117	0.101691	20.1706	1.77497e-90
SLC39A11	-1.32555	0.0907383	-14.6085	2.48088e-48
EPHB2	-2.22741	0.168655	-13.2069	8.01041e-40
PRAM1	2.12961	0.150287	14.1704	1.39772e-45
MYH11	1.86494	0.185303	10.0643	7.94463e-24
PDZD2	2.26916	0.171804	13.2079	7.90078e-40
MYO18B	-2.32178	0.360213	-6.44559	1.15155e-10
C1QTNF6	-2.29546	0.136609	-16.8031	2.31481e-63
FAM83F	-2.23128	0.270161	-8.25909	1.46792e-16
SEC14L4	1.52776	0.208541	7.32598	2.37163e-13
GIMAP6	2.1036	0.121642	17.2933	5.28378e-67
GIMAP4	1.49444	0.116068	12.8756	6.17743e-38
NTS	-3.10839	0.457554	-6.79349	1.09451e-11
LRRIQ1	1.50634	0.242693	6.20678	5.40812e-10
SFTPD	2.20917	0.260513	8.48011	2.24984e-17
DYDC2	1.93578	0.256414	7.54943	4.37179e-14
TMTC1	1.10063	0.200259	5.49606	3.88378e-08
SPINK5	-1.4482	0.288857	-5.01357	5.34286e-07
E2F5	-1.23537	0.11079	-11.1506	7.11366e-29
CA1	1.70845	0.314482	5.4326	5.554e-08
LYVE1	3.25062	0.172387	18.8565	2.59715e-79
MICALCL	1.3395	0.166235	8.05785	7.76512e-16
TEX15	-3.19481	0.443609	-7.20186	5.93949e-13
RNF122	1.32573	0.096087	13.7972	2.64844e-43
DUSP26	1.48503	0.193018	7.69375	1.42886e-14
GSC	-2.44331	0.341043	-7.16424	7.82184e-13
CATSPERB	-2.14738	0.219942	-9.76339	1.61662e-22
LOXL2	-1.75063	0.181861	-9.62624	6.19526e-22
PEBP4	2.52367	0.294398	8.57231	1.01429e-17
ADAMDEC1	-2.20207	0.232479	-9.47214	2.74172e-21
CTIF	1.20138	0.0886278	13.5553	7.37205e-42
CCNB1	-2.97566	0.147406	-20.1869	1.27657e-90
CNTN6	3.53229	0.265896	13.2845	2.84796e-40
CHL1	-1.5296	0.227608	-6.72032	1.81325e-11
TRPM1	2.18328	0.302964	7.20639	5.74539e-13
REG4	-7.19423	0.544999	-13.2004	8.72334e-40
GSTM5	2.43805	0.149979	16.256	2.02647e-59
SYT6	-2.20649	0.283596	-7.78038	7.23093e-15
PSRC1	-1.22242	0.125728	-9.72275	2.41171e-22
WNT2B	1.30982	0.125256	10.4572	1.35818e-25
PTGFRN	-1.15794	0.103819	-11.1535	6.88466e-29
TRIM45	-1.3093	0.117288	-11.1631	6.17903e-29
CD101	2.79207	0.13465	20.7357	1.6512e-95
VTCN1	-2.77732	0.296955	-9.35268	8.54523e-21
NGF	-1.00303	0.256223	-3.91468	9.0524e-05
FKBP11	-1.83856	0.120825	-15.2166	2.74234e-52
TMEM106C	-1.03872	0.114055	-9.10714	8.45828e-20
GRHL1	-1.50739	0.154309	-9.76864	1.53505e-22
MYCN	-3.33574	0.304991	-10.9372	7.65379e-28
LDHA	-1.34713	0.103076	-13.0693	4.93079e-39
SAA2	-2.31829	0.297704	-7.78722	6.85004e-15
ERN2	-3.06419	0.331082	-9.25508	2.14068e-20
IL2RA	-1.33633	0.169976	-7.86188	3.78407e-15
EMP1	1.79652	0.138632	12.9589	2.09335e-38
SOX5	1.78204	0.158354	11.2535	2.22634e-29
RERG	1.10827	0.154868	7.1562	8.29458e-13
KLRD1	1.14277	0.173316	6.59359	4.29302e-11
CDCA8	-3.05681	0.147496	-20.7247	2.07622e-95
HOOK1	-1.04775	0.10013	-10.4639	1.26519e-25
DSG3	-3.19132	0.423392	-7.53752	4.78987e-14
DSG1	-1.51672	0.428719	-3.53779	0.000403484
APLNR	1.45073	0.152947	9.48521	2.41902e-21
TCN1	-6.76567	0.406444	-16.646	3.23436e-62
CLDN10	-4.08701	0.306033	-13.3548	1.11045e-40
ADAMTS8	3.51199	0.224461	15.6463	3.5189e-55
ACRV1	-2.68536	0.236878	-11.3365	8.65573e-30
ETS1	1.22428	0.11135	10.9949	4.04301e-28
KLB	1.30228	0.298591	4.36143	1.29217e-05
AGTPBP1	1.26972	0.0755689	16.8022	2.35347e-63
GOLM1	-2.64097	0.120697	-21.881	3.94465e-106
FAM189A2	2.9214	0.180824	16.1561	1.02894e-58
PSAT1	-3.51203	0.179428	-19.5734	2.60475e-85
SDS	-1.15728	0.187102	-6.18529	6.19888e-10
MSI1	-2.35217	0.283329	-8.3019	1.02461e-16
HNF1A	-3.85513	0.348603	-11.0588	1.9877e-28
TBX3	2.15636	0.141135	15.2786	1.06128e-52
OASL	1.02947	0.174184	5.91028	3.41522e-09
RNFT2	-2.23124	0.178512	-12.4991	7.55194e-36
BICDL1	-1.98669	0.15789	-12.5827	2.62733e-36
CCDC146	1.12584	0.172383	6.53105	6.53115e-11
CD36	2.89381	0.203463	14.2227	6.62088e-46
HILPDA	-1.53778	0.180001	-8.54317	1.30591e-17
FAM71F1	-2.38285	0.384691	-6.1942	5.85829e-10
KCP	-2.11563	0.227373	-9.30464	1.34452e-20
ADGRB3	1.75964	0.224222	7.84778	4.23479e-15
KHDC1	-1.08909	0.115576	-9.42317	4.37679e-21
NT5E	-1.92651	0.201505	-9.56058	1.17102e-21
EPHA7	-1.06363	0.309396	-3.43776	0.000586538
CGA	-6.84385	0.615855	-11.1128	1.08739e-28
LMO2	1.91312	0.104943	18.23	2.98135e-74
PRPH	1.47033	0.253039	5.81067	6.22222e-09
TROAP	-3.8518	0.17919	-21.4956	1.7132e-102
B4GALNT1	-2.54271	0.236782	-10.7386	6.70375e-27
ESPL1	-3.12634	0.167938	-18.616	2.38291e-77
NHSL1	1.73557	0.130584	13.2908	2.61685e-40
HEY2	1.09469	0.143733	7.61611	2.61441e-14
PKIB	-1.98172	0.207338	-9.55794	1.20126e-21
NMBR	1.41888	0.225354	6.29623	3.04981e-10
STX11	2.99946	0.12963	23.1386	1.8945e-118
EGR4	-2.01867	0.297843	-6.77761	1.2218e-11
EMX1	-2.99619	0.359251	-8.34009	7.4231e-17
BCO1	-2.49575	0.230375	-10.8334	2.39066e-27
AGT	-2.69544	0.266233	-10.1244	4.30749e-24
KCNK1	-1.36542	0.159241	-8.57456	9.947e-18
CHRND	-2.28182	0.402592	-5.66783	1.44616e-08
HTR2B	-1.60517	0.244291	-6.57075	5.00613e-11
ITM2C	-1.22361	0.115208	-10.6208	2.38458e-26
SLC19A3	2.88078	0.202805	14.2046	8.57339e-46
SERPINE2	-1.20873	0.168561	-7.17089	7.45107e-13
WNT10A	-1.76473	0.225918	-7.81137	5.65697e-15
CYP27A1	1.70344	0.146047	11.6637	1.95415e-31
MFSD9	-1.01139	0.0759	-13.3253	1.65075e-40
ALDH1L2	-1.0797	0.166287	-6.49295	8.41722e-11
STAB2	1.24009	0.187002	6.6314	3.32507e-11
USP44	1.01844	0.178316	5.71141	1.12045e-08
CKAP4	-1.08708	0.0943313	-11.5241	9.97743e-31
DRAM1	1.07711	0.150213	7.17056	7.46923e-13
SLC41A2	-1.05002	0.118639	-8.85049	8.71344e-19
PCDH8	-3.50912	0.539708	-6.50187	7.93258e-11
CKAP2	-1.09661	0.110349	-9.93762	2.85563e-23
CNMD	-3.55672	0.528418	-6.73089	1.68632e-11
TBC1D4	1.01	0.0939566	10.7497	5.94673e-27
THSD1	2.23698	0.119044	18.7911	8.9307e-79
BORA	-1.09834	0.107579	-10.2096	1.79553e-24
LRCH1	1.00652	0.0837409	12.0195	2.80635e-33
LMO7	1.4257	0.115642	12.3286	6.35451e-35
SCEL	1.39076	0.20243	6.87032	6.40594e-12
EDNRB	3.52025	0.162358	21.682	3.03283e-104
LCP1	1.10574	0.12942	8.54381	1.29867e-17
TNS3	1.12042	0.0941727	11.8975	1.21889e-32
IGF2BP3	-3.93813	0.273433	-14.4025	4.98814e-47
IL6	2.85926	0.226481	12.6247	1.54291e-36
BZW2	-1.30466	0.0919209	-14.1933	1.00778e-45
TBRG4	-1.08843	0.0807333	-13.4818	2.00265e-41
TTYH3	-1.36942	0.110759	-12.364	4.09307e-35
TM6SF1	1.46977	0.12875	11.4157	3.49085e-30
CIB2	-1.28479	0.161236	-7.96836	1.608e-15
CHAD	-1.1892	0.230183	-5.16631	2.3876e-07
BRIP1	-2.64338	0.143352	-18.4397	6.30471e-76
TBR1	-2.80283	0.44381	-6.31539	2.69478e-10
SCN7A	2.49363	0.191373	13.0302	8.24189e-39
BLK	-1.22904	0.22853	-5.37804	7.53008e-08
GATA4	-1.85508	0.451276	-4.11074	3.94396e-05
HLX	1.24458	0.123895	10.0454	9.6226e-24
IL36G	-4.40137	0.359983	-12.2266	2.24148e-34
IL36RN	-6.18495	0.40204	-15.3839	2.09839e-53
GYPC	1.75058	0.11327	15.4549	6.99355e-54
KLF4	2.29302	0.16673	13.7529	4.88984e-43
TMOD1	1.77096	0.154645	11.4517	2.30483e-30
DAB2IP	1.06828	0.0906897	11.7795	4.97792e-32
SLC31A2	1.53405	0.123515	12.4199	2.03804e-35
TLR4	1.65001	0.13939	11.8374	2.50206e-32
ALDOB	-1.71821	0.284291	-6.04382	1.50509e-09
BAAT	-1.80258	0.305487	-5.90068	3.62012e-09
KIF12	-1.79917	0.22351	-8.04962	8.30507e-16
WDR38	2.01292	0.319535	6.29952	2.98567e-10
GABBR2	-2.19615	0.306719	-7.16016	8.05814e-13
HEMGN	2.566	0.210905	12.1666	4.68141e-34
NR5A1	-2.70494	0.377771	-7.16025	8.05275e-13
CTSV	-2.27949	0.227334	-10.027	1.15946e-23
LMX1B	-1.98568	0.313622	-6.33144	2.42878e-10
ENPP2	1.30295	0.134782	9.66712	4.15938e-22
DSCC1	-1.77409	0.143619	-12.3527	4.70758e-35
IL33	2.20192	0.17901	12.3005	8.99614e-35
DMRT1	-3.94855	0.492186	-8.02247	1.0364e-15
SPAG8	1.21162	0.196054	6.18004	6.40846e-10
ALDH1B1	-1.06443	0.105315	-10.1071	5.13912e-24
ARHGEF39	-2.44167	0.124588	-19.5979	1.61024e-85
IGFBPL1	-2.34575	0.226868	-10.3397	4.65848e-25
PPIL1	-1.03506	0.0943222	-10.9737	5.11293e-28
TFAP2A	-3.75635	0.204093	-18.4051	1.19583e-75
CAPN11	1.17877	0.153288	7.68989	1.4726e-14
TINAG	-6.7203	0.575118	-11.6851	1.51929e-31
KIAA0319	-1.05325	0.269466	-3.90865	9.28126e-05
TUBB2A	-1.11651	0.147702	-7.55922	4.05504e-14
GCM1	-2.67257	0.282752	-9.45201	3.32373e-21
FOXF2	1.23299	0.15798	7.80471	5.96407e-15
BPHL	-1.2733	0.0936317	-13.5991	4.05629e-42
TUBB2B	-3.96554	0.298707	-13.2757	3.20414e-40
UQCC2	-1.49627	0.11114	-13.4629	2.58641e-41
HMGA1	-2.28945	0.146984	-15.5762	1.05673e-54
TCF19	-1.16528	0.111525	-10.4486	1.48738e-25
ATAT1	-1.2873	0.0986929	-13.0435	6.9242e-39
RNF144B	1.73914	0.113475	15.3262	5.11279e-53
FGFBP2	3.0521	0.25205	12.1091	9.45576e-34
FHDC1	1.16048	0.117654	9.86352	5.99136e-23
TTC29	2.10108	0.326138	6.44233	1.17657e-10
MYO7A	-1.9779	0.118722	-16.66	2.56006e-62
ARRB1	1.24915	0.111746	11.1784	5.20123e-29
SLCO2B1	1.45478	0.141945	10.2489	1.19659e-24
SYTL2	-1.00716	0.135685	-7.42278	1.14685e-13
LRRC32	2.35785	0.120488	19.5691	2.83535e-85
MRPL15	-1.12757	0.10306	-10.941	7.34194e-28
PI15	-1.50207	0.206748	-7.26522	3.72431e-13
TTPA	1.51949	0.276831	5.48887	4.04509e-08
GGH	-1.43676	0.188668	-7.61531	2.63066e-14
SLCO5A1	-3.12468	0.202728	-15.4132	1.33505e-53
SULF1	-2.51057	0.183041	-13.7159	8.15804e-43
TMPRSS4	-4.80814	0.216409	-22.2179	2.30828e-109
MMP7	-2.02096	0.253926	-7.95885	1.73643e-15
TRIM29	-1.07203	0.31792	-3.37201	0.000746222
BTG4	1.04901	0.310777	3.37544	0.000736978
FXYD6	1.90368	0.119634	15.9126	5.18454e-57
MMP13	-6.11712	0.339002	-18.0445	8.71329e-73
TMPRSS13	-1.15213	0.144607	-7.96729	1.62189e-15
CASP1	1.93371	0.119861	7.78991	6.70584e-15
CASP5	1.3631	0.171496	7.94833	1.89037e-15
UNC13C	-1.50643	0.280087	-5.37842	7.51404e-08
NUSAP1	-2.56787	0.136783	-18.7733	1.2495e-78
KIF23	-2.58768	0.153805	-16.8244	1.61564e-63
ITGA11	-2.84049	0.199245	-14.2562	4.09901e-46
KNL1	-2.58212	0.148906	-17.3406	2.32365e-67
PAQR5	1.39427	0.170115	8.19603	2.48453e-16
LRRC49	1.06634	0.131442	8.11263	4.95341e-16
ITPKA	-5.17444	0.26903	-19.2337	1.9334e-82
UACA	1.0584	0.105774	10.0063	1.43035e-23
SMAD6	2.55794	0.126362	20.243	4.09778e-91
TMEM62	-1.0567	0.0876855	-12.051	1.91584e-33
PAK6	-1.17438	0.121286	-9.68271	3.57132e-22
DUOX1	2.54621	0.210024	12.1234	7.93984e-34
SLC28A2	-4.45856	0.392269	-11.3661	6.16957e-30
STRA6	-4.51064	0.253277	-17.8091	6.00342e-71
CYP19A1	-1.17548	0.19471	-6.0371	1.56909e-09
SEMA6D	2.11025	0.194399	10.8552	1.88387e-27
BCL2L10	-4.18921	0.301895	-13.8764	8.81033e-44
SPTBN5	-1.29129	0.165	-7.82596	5.03801e-15
TTLL7	1.55586	0.189989	8.18919	2.62984e-16
BRDT	-6.099	0.439238	-13.8854	7.76537e-44
GIPC2	1.76765	0.20373	8.67644	4.08366e-18
ARHGAP29	1.2058	0.123529	9.76123	1.65147e-22
SLC44A5	-2.45224	0.25674	-9.55144	1.27901e-21
DNASE2B	2.88149	0.236449	12.1865	3.66682e-34
SELENOI	-1.25058	0.103585	-12.073	1.46724e-33
CGREF1	-4.12893	0.244414	-16.8932	5.05112e-64
LHCGR	-2.61337	0.377969	-6.91424	4.7039e-12
SLC5A6	-1.15282	0.0826937	-13.9408	3.57792e-44
SIX3	-1.61781	0.389071	-4.15813	3.20861e-05
CENPO	-1.0366	0.0975233	-10.6293	2.17805e-26
TRIM54	-3.69185	0.294302	-12.5444	4.26379e-36
CYP2C9	-1.77928	0.323742	-5.49598	3.88541e-08
BTBD16	-2.1914	0.252549	-8.67715	4.05827e-18
KIF11	-2.68822	0.140761	-19.0978	2.63329e-81
CUZD1	-1.19288	0.165466	-7.20919	5.62862e-13
CEP55	-3.25345	0.159799	-20.3597	3.81106e-92
KIF20B	-1.2651	0.115501	-10.9532	6.41156e-28
PLCE1	1.43573	0.124414	11.54	8.29563e-31
RBP4	1.95933	0.259897	7.5389	4.73966e-14
GPR87	-4.09974	0.324277	-12.6427	1.22775e-36
ZNF365	1.86105	0.17751	10.4842	1.02091e-25
ADAMTS14	-2.66474	0.166499	-16.0045	1.18798e-57
TET1	-1.3817	0.158729	-8.7048	3.18138e-18
DNA2	-2.19806	0.128912	-17.0509	3.4434e-65
MYPN	-2.72378	0.379772	-7.17214	7.3832e-13
AOX1	1.25348	0.215945	5.80464	6.45031e-09
ATIC	-1.24347	0.0720667	-17.2544	1.03682e-66
BARD1	-1.0916	0.0952674	-11.4583	2.1371e-30
CDK15	1.29159	0.166719	7.74709	9.40224e-15
MDH1B	1.41021	0.214531	6.57346	4.91607e-11
HECW2	1.37167	0.121629	11.2776	1.69363e-29
SSFA2	1.18904	0.0931951	12.7586	2.79251e-37
CHRNA1	-1.24015	0.241312	-5.13918	2.75938e-07
WDR12	-1.00993	0.078349	-12.8901	5.11681e-38
CCDC54	2.19649	0.195116	11.2573	2.13101e-29
SECISBP2L	1.40341	0.127399	11.0159	3.20428e-28
CILP	-2.4213	0.244389	-9.90757	3.85919e-23
ARHGAP24	1.40841	0.105792	13.313	1.94403e-40
PCDH10	1.24887	0.272002	4.59141	4.40271e-06
ZGRF1	-1.00892	0.113511	-8.88836	6.20187e-19
PRKG2	2.65944	0.181451	14.6565	1.22356e-48
RASGEF1B	1.53815	0.102529	15.002	7.12078e-51
FGF5	-3.88924	0.449177	-8.6586	4.776e-18
IL21	-1.26573	0.340032	-3.72238	0.000197357
FGF2	2.09536	0.171826	12.1947	3.31686e-34
MMRN1	2.39227	0.180185	13.2767	3.15879e-40
PDE5A	1.77497	0.112057	15.8398	1.65219e-56
PRDM5	1.27433	0.108865	11.7056	1.19367e-31
TRPC3	1.29112	0.194367	6.64272	3.07956e-11
CXCL9	-1.31087	0.229192	-5.7195	1.06838e-08
FRAS1	1.57407	0.196645	8.00464	1.19818e-15
ANXA3	1.89357	0.154739	12.2372	1.96751e-34
CENPE	-2.61422	0.157325	-16.6167	5.28011e-62
CASP6	-1.95415	0.0807675	-11.8136	3.32174e-32
EGF	-2.25054	0.209736	-10.7303	7.3318e-27
SLC39A8	2.50884	0.137669	18.2237	3.34511e-74
FBN2	-1.28818	0.248783	-5.17794	2.24352e-07
MAPK8IP3	-1.14864	0.133657	-8.59394	8.40365e-18
SHISAL1	-1.35871	0.23672	-5.73973	9.48249e-09
PIK3C2G	-1.61266	0.382255	-4.2188	2.45604e-05
PLCZ1	-2.4275	0.454598	-5.33988	9.30075e-08
PRICKLE1	1.47961	0.138814	10.6589	1.58435e-26
CD27	-1.30277	0.166744	-7.81299	5.58455e-15
SLC38A4	-1.68315	0.264028	-6.37488	1.83104e-10
COL2A1	-3.40415	0.401813	-8.47196	2.41289e-17
LRIG3	-1.39634	0.164984	-8.46347	2.59543e-17
INHBE	-1.61186	0.238572	-6.75628	1.41581e-11
PTPRQ	3.61691	0.300517	12.0356	2.30859e-33
ASCL1	-4.72845	0.488527	-9.679	3.70317e-22
FOXN4	-1.62212	0.388934	-4.17068	3.03687e-05
PDX1	-9.15839	0.612632	-14.9493	1.57501e-50
LNX2	1.00302	0.0964565	10.3987	2.51452e-25
CCDC65	1.28168	0.152581	8.4	4.46484e-17
SLC39A5	-3.05887	0.311416	-9.82245	9.01231e-23
DHH	1.91436	0.158937	12.0447	2.06759e-33
ACVRL1	2.55492	0.109462	23.3407	1.71371e-120
GPR84	-1.83651	0.174291	-10.5371	5.82915e-26
N4BP2L1	1.23068	0.106181	11.5903	4.61296e-31
GALNT6	-1.82417	0.175815	-10.3755	3.20392e-25
METTL21C	1.78329	0.284958	6.25806	3.89784e-10
ZIC5	-5.59367	0.533118	-10.4924	9.36467e-26
GRTP1	-1.54581	0.123555	-12.5112	6.48716e-36
TTC6	-1.06651	0.194316	-5.48852	4.05314e-08
SSTR1	2.19194	0.250329	8.75626	2.01842e-18
CDH24	-1.55369	0.140104	-11.0896	1.40988e-28
NOVA1	-1.20827	0.249274	-4.84715	1.25248e-06
RTN1	1.6208	0.15597	10.3917	2.7038e-25
SYT16	-2.91591	0.287321	-10.1486	3.36031e-24
RAB15	-1.39608	0.142272	-9.81276	9.92156e-23
KCNH5	-1.48598	0.537006	-2.76716	0.00565478
GPR65	1.17673	0.134266	8.76416	1.88177e-18
JDP2	1.45074	0.091335	15.8838	8.21097e-57
AK7	1.33932	0.186168	7.19413	6.286e-13
FAM181A	1.76885	0.329913	5.36156	8.25051e-08
SLC24A4	2.07916	0.170026	12.2285	2.19066e-34
FBLN5	1.7718	0.155031	11.4287	3.00615e-30
DUOXA1	1.97491	0.208739	9.46115	3.04576e-21
SORD	-1.41092	0.11242	-12.5505	3.95221e-36
HDC	1.01434	0.19195	5.28438	1.26133e-07
GCNT3	-5.19092	0.264222	-19.6461	6.24462e-86
BCL2A1	1.25423	0.152983	8.1985	2.43415e-16
ARRDC4	1.16862	0.121338	9.63114	5.90716e-22
PIF1	-2.37233	0.163807	-14.4824	1.56468e-47
CYP1A1	2.5816	0.512623	5.03605	4.75233e-07
CCDC33	1.57777	0.318076	4.96035	7.03671e-07
CYP1A2	3.79794	0.398426	9.53235	1.53759e-21
HAPLN3	-1.16177	0.135687	-8.56213	1.108e-17
RHCG	-2.87591	0.350188	-8.21248	2.16662e-16
FANCI	-1.98563	0.120368	-16.4963	3.89854e-61
WDR93	1.03727	0.196157	5.28794	1.23704e-07
TICRR	-2.92139	0.162296	-18.0004	1.93448e-72
NTRK3	2.01383	0.182819	11.0154	3.2206e-28
ZNF710	-1.03279	0.1555	-6.64177	3.09934e-11
ST8SIA2	-3.02553	0.323068	-9.36498	7.60676e-21
FURIN	-1.0465	0.17828	-5.86997	4.3588e-09
SH3GL3	4.20671	0.307209	13.6933	1.11313e-42
43355	-3.84889	0.39659	-9.70497	2.87166e-22
PMM2	-1.06486	0.0737093	-14.4467	2.62954e-47
ITGAX	1.01867	0.13929	7.31334	2.60582e-13
MYLK3	1.35641	0.218698	6.2022	5.56781e-10
NKD1	1.44036	0.205249	7.01763	2.25664e-12
MARVELD3	-1.4474	0.105589	-13.7078	9.11184e-43
CHST4	-1.99424	0.282035	-7.0709	1.53934e-12
CLEC18B	-1.0572	0.232066	-4.5556	5.22374e-06
NLRC5	-1.28196	0.121431	-2.32193	0.0202365
ADAMTS18	-1.57311	0.240098	-6.55194	5.67927e-11
GCSH	-1.02961	0.100516	-10.2432	1.2692e-24
CMTM2	2.34086	0.134154	17.449	3.50064e-68
CDH13	1.8174	0.153712	11.8234	2.95501e-32
IRF8	1.03461	0.136795	7.5632	3.93276e-14
RPL3L	-1.9158	0.212166	-9.02974	1.72073e-19
MYOCD	1.91886	0.213967	8.96802	3.01899e-19
UNC45B	2.57961	0.171105	15.0762	2.32356e-51
LRRC46	1.8062	0.227888	7.92583	2.26623e-15
RHBDL3	-1.13202	0.23375	-4.84286	1.27985e-06
SPACA3	-1.37732	0.308048	-4.47114	7.78052e-06
ABCA8	2.92162	0.198839	14.6934	7.10568e-49
GATA6	1.77757	0.163864	10.8479	2.04125e-27
GREB1L	-3.22782	0.240811	-13.404	5.73181e-41
SLC14A1	2.85214	0.205861	13.8547	1.19213e-43
SLC13A5	-2.62294	0.304864	-8.60364	7.72277e-18
ZMYND15	1.17193	0.120675	9.71144	2.69499e-22
ASGR1	1.1617	0.14815	7.84136	4.45678e-15
PIK3R5	1.24594	0.1253	9.94362	2.68867e-23
SLC16A3	-1.35845	0.138699	-9.79422	1.19215e-22
[truncated: 2,852 more rows]

## Sheet: LUSC
GeneID	log2FoldChange	lfcSE	stat	pvalue
TSPAN6	-1.10764	0.111629	-9.92244	3.32538e-23
C1orf112	-2.23166	0.0961521	-23.2096	3.63906e-119
FGR	2.45211	0.154819	15.8386	1.68489e-56
GCLC	-3.37842	0.203908	-16.5683	1.18037e-61
ENPP4	2.18886	0.170676	12.8247	1.19273e-37
SEMA3F	-1.05198	0.115878	-9.07833	1.10254e-19
CFTR	2.5731	0.266903	9.64057	5.38859e-22
HS3ST1	-1.12581	0.204727	-5.49906	3.81824e-08
AOC1	-1.41768	0.281704	-5.03251	4.8409e-07
WNT16	-3.2775	0.307481	-10.6592	1.57946e-26
HECW1	-2.362	0.207697	-11.3723	5.74334e-30
KLHL13	-2.58162	0.201942	-12.784	2.01466e-37
DBNDD1	-1.03512	0.1655	-6.25447	3.98878e-10
CFLAR	1.51549	0.0906808	16.7124	1.0649e-62
TFPI	1.94804	0.196646	9.90631	3.90809e-23
SLC7A2	1.44607	0.239557	6.03641	1.57583e-09
PLXND1	1.49956	0.11848	12.6567	1.0272e-36
FKBP4	-2.13963	0.108732	-19.6779	3.33416e-86
HSPB6	3.61123	0.20311	17.7797	1.01496e-70
ARHGAP33	-1.2486	0.171478	-7.28137	3.30447e-13
PDK4	3.97814	0.237248	16.7679	4.19379e-63
ZMYND10	3.04572	0.283355	10.7488	6.00467e-27
SLC25A13	-1.09581	0.0889951	-12.3132	7.69183e-35
ST7	1.12081	0.0698315	16.0502	5.69705e-58
SLC4A1	3.07	0.311824	9.8453	7.18277e-23
PRSS22	-1.92711	0.20669	-9.32366	1.12393e-20
HOXA11	-6.43767	0.332869	-19.34	2.47666e-83
LIG3	-1.06197	0.0917406	-11.5758	5.46839e-31
ACSM3	1.61393	0.197523	8.17086	3.06206e-16
REXO5	-1.31051	0.117669	-11.1373	8.26241e-29
MPO	1.5691	0.203098	7.72584	1.11119e-14
ITGAL	1.93757	0.182319	10.6274	2.22229e-26
ASB4	1.15226	0.266128	4.32971	1.49304e-05
YBX2	-4.54419	0.254905	-17.827	4.36419e-71
KRT33A	-7.54332	0.462733	-16.3017	9.60287e-60
TMEM132A	-3.19625	0.129474	-24.6864	1.49809e-134
TAC1	-1.20706	0.611913	-1.9726	0.0485409
CX3CL1	1.11822	0.178749	6.2558	3.9548e-10
DLX6	-8.1076	0.296473	-27.3469	1.17637e-164
BAIAP2L1	-1.13727	0.0937634	-12.1291	7.40363e-34
ETV1	1.96571	0.179549	10.9481	6.78657e-28
ALDH3B1	3.22708	0.190618	16.9296	2.7236e-64
TTC22	-1.87775	0.145388	-12.9154	3.68314e-38
CCL26	-3.78759	0.254494	-14.8828	4.2621e-50
USH1C	-1.97623	0.320976	-6.15694	7.41642e-10
GGCT	-1.98783	0.0991918	-20.0403	2.45323e-89
DBF4	-2.08161	0.102451	-20.3181	8.9001e-92
TBXA2R	1.7017	0.123684	13.7585	4.5291e-43
GTF2IRD1	-1.32685	0.0972883	-13.6383	2.36914e-42
ARHGAP44	2.9763	0.170225	17.4845	1.88033e-68
PRSS21	-1.58152	0.303113	-5.21759	1.81262e-07
CEACAM21	2.32915	0.173804	13.401	5.96719e-41
NOS2	-2.61837	0.363077	-7.21161	5.52937e-13
DNAH9	3.15707	0.302955	10.4209	1.99046e-25
SLC13A2	1.04308	0.366239	2.84808	0.00439841
GAS7	1.63376	0.163769	9.97599	1.94161e-23
MATK	1.16448	0.169699	6.862	6.79021e-12
CEACAM7	-4.65422	0.401703	-11.5862	4.8397e-31
TKTL1	-1.75682	0.470475	-3.73413	0.000188367
PAX6	-1.10593	0.214586	-5.15378	2.55289e-07
RPUSD1	-1.19396	0.0884309	-13.5016	1.53106e-41
CACNA2D2	4.64792	0.232898	19.9569	1.30503e-88
BAIAP3	1.09331	0.203312	5.3775	7.55258e-08
SELE	2.9953	0.29877	10.0254	1.17855e-23
E2F2	-2.91475	0.123452	-23.6104	3.01613e-123
JARID2	-1.24187	0.0952289	-13.0408	7.16608e-39
CDKL5	1.39448	0.114702	12.1574	5.23993e-34
TFAP2B	-3.48419	0.402234	-8.6621	4.63154e-18
CELSR3	-2.28839	0.177768	-12.8729	6.39676e-38
PLEKHG6	-2.84654	0.153793	-18.5089	1.74978e-76
PGLYRP1	2.84018	0.206482	13.7551	4.747e-43
NFIX	1.42254	0.136528	10.4194	2.02158e-25
MMP25	1.41114	0.162841	8.66577	4.48472e-18
MAPK8IP2	-2.09817	0.21594	-9.71646	2.56546e-22
RHOBTB2	2.73993	0.16981	16.1353	1.4422e-58
PAX7	-7.0843	0.563051	-12.582	2.65271e-36
MASP2	1.23698	0.154535	8.00455	1.19903e-15
IYD	2.1706	0.306029	7.0928	1.31429e-12
HHATL	2.14377	0.364704	5.87813	4.1493e-09
NCAPD2	-2.098	0.106973	-19.6125	1.2103e-85
IFFO1	1.19228	0.138973	8.57921	9.55242e-18
SEMA3G	3.41004	0.144868	23.5388	1.63305e-122
SLC6A13	2.20997	0.228577	9.66842	4.10689e-22
PRSS3	-5.43542	0.3604	-15.0816	2.13898e-51
CD4	1.56693	0.157517	9.94764	2.58228e-23
BTK	2.0816	0.16628	12.5187	5.89994e-36
FYN	1.11819	0.124269	8.99809	2.29679e-19
FMO1	-1.7177	0.228623	-7.51326	5.76746e-14
ANOS1	2.73519	0.193489	14.1361	2.27389e-45
DPF1	-3.00989	0.206466	-14.5782	3.86831e-48
SYT7	-2.14762	0.20462	-10.4957	9.04466e-26
ANLN	-4.16509	0.123403	-33.7519	1.00369e-249
DCN	1.4532	0.202089	7.19088	6.43736e-13
TYROBP	2.02736	0.164173	12.349	4.93467e-35
GABRA3	-7.3362	0.244058	-30.0593	1.65205e-198
BRCA1	-1.96765	0.110243	-17.8482	2.98325e-71
CD22	1.59023	0.231036	6.88305	5.85851e-12
SEMA3B	2.78058	0.212463	13.0874	3.8886e-39
PRICKLE3	-1.56162	0.0917428	-17.0217	5.66989e-65
NR1H4	1.71907	0.479181	3.58751	0.000333854
ALOX5	2.77014	0.174316	15.8915	7.25345e-57
CALCOCO1	1.66636	0.0903041	18.4528	4.95301e-76
PSMC4	-1.23831	0.105457	-11.7424	7.72624e-32
SLC7A14	-1.63693	0.429447	-3.81172	0.000138005
SLC25A39	-1.29476	0.0814798	-15.8906	7.35906e-57
DDX11	-1.98724	0.130632	-15.2125	2.92088e-52
GPRC5A	3.07234	0.215062	14.2859	2.68077e-46
TACC3	-1.94527	0.105448	-18.4477	5.43642e-76
POLA2	-1.2604	0.0852594	-14.7831	1.88195e-49
WAS	1.39292	0.150378	9.26278	1.99176e-20
BID	-1.12055	0.112255	-9.98217	1.82425e-23
NPC1L1	-1.09673	0.216848	-5.05758	4.24599e-07
XYLT2	-1.02974	0.0913385	-11.2739	1.76514e-29
STMN4	-1.90665	0.330358	-5.77146	7.85876e-09
ISL1	-4.07007	0.417976	-9.73757	2.08471e-22
CHDH	1.13548	0.193326	5.8734	4.26945e-09
CLCA4	-6.44634	0.387185	-16.6493	3.06319e-62
CNTN1	-1.4283	0.268255	-5.32439	1.0129e-07
SLC11A1	2.4901	0.15945	15.6169	5.58927e-55
ATP1A2	3.59364	0.279581	12.8537	8.20425e-38
ZNF582	1.05879	0.172475	6.13878	8.31593e-10
VSIG2	3.32012	0.269842	12.3039	8.62615e-35
MARCO	4.01256	0.260685	15.3924	1.84206e-53
CYP24A1	-4.79733	0.344519	-13.9247	4.48182e-44
SYT13	-3.57754	0.356417	-10.0375	1.04251e-23
SNAI2	-1.95186	0.14717	-13.2626	3.81688e-40
CD74	1.82224	0.169683	10.7391	6.67018e-27
HGF	2.26885	0.212755	10.6641	1.49819e-26
ADGRA2	1.13984	0.145578	7.82974	4.88866e-15
ZFP64	-1.6146	0.0828053	-19.4987	1.12582e-84
SAMD4A	1.59257	0.160198	9.94125	2.7534e-23
PLEKHB1	1.80945	0.233537	7.74801	9.33423e-15
SLC7A9	-1.44619	0.226805	-6.37635	1.81362e-10
SPAST	-1.33069	0.0992201	-13.4115	5.17671e-41
CPS1	-1.42595	0.294151	-4.8477	1.24904e-06
C8B	4.91356	0.408235	12.0361	2.29499e-33
FHL1	3.93874	0.185176	21.2702	2.14275e-100
NLRP2	-1.56203	0.340176	-4.59182	4.39405e-06
BIRC3	1.28383	0.208634	6.15353	7.57761e-10
SNAPC1	-1.09927	0.117199	-9.37948	6.62991e-21
STRAP	-1.00618	0.0872184	-11.5363	8.65819e-31
ABCC2	-3.23502	0.328142	-9.85858	6.2936e-23
GCLM	-2.44659	0.214788	-11.3907	4.65231e-30
EHD2	1.48042	0.15345	9.64757	5.03346e-22
DEPDC1	-4.45752	0.128882	-34.5861	4.08977e-262
HSD17B6	4.09321	0.160784	25.4579	5.77019e-143
VIM	1.83064	0.147177	12.4384	1.61767e-35
KCNG1	-5.10215	0.26285	-19.4109	6.24282e-84
INSRR	-2.06	0.282766	-7.28518	3.2123e-13
TNFRSF1B	1.39768	0.149056	9.37692	6.79277e-21
ARNTL2	-3.35723	0.160211	-20.9551	1.68669e-97
IBSP	-3.87647	0.26035	-14.8895	3.85838e-50
HMGB3	-2.58886	0.145756	-17.7616	1.40257e-70
BAK1	-1.06011	0.10753	-9.85872	6.28472e-23
MUSK	2.7881	0.201138	13.8616	1.08233e-43
FAM13B	1.05921	0.0788407	13.4348	3.78147e-41
ARHGAP31	2.77257	0.142428	19.4664	2.11719e-84
CENPQ	-1.17743	0.109223	-10.7801	4.27653e-27
ARID4A	1.04675	0.0707396	14.7973	1.52589e-49
PNPLA6	1.59039	0.0834754	19.0522	6.29891e-81
LRRC7	-1.03906	0.198652	-5.23054	1.69014e-07
GAB2	1.9424	0.163144	11.9061	1.10014e-32
APBA2	-1.60756	0.174656	-9.20415	3.44396e-20
EFCAB1	1.88864	0.247812	7.62127	2.512e-14
MYOC	3.26133	0.479976	6.79478	1.08476e-11
FAM136A	-1.32553	0.0797299	-16.6253	4.57011e-62
DEPDC1B	-4.13442	0.132631	-31.1722	2.53405e-213
DAPK2	2.58753	0.154435	16.7548	5.22392e-63
TIMP2	1.21775	0.152084	8.00712	1.17431e-15
OTC	4.83492	0.295611	16.3557	3.96024e-60
USP2	1.31614	0.167183	7.87244	3.47785e-15
FLT4	2.41439	0.134922	17.8947	1.2973e-71
NSUN2	-1.29468	0.08989	-14.4029	4.95852e-47
METTL1	-1.2206	0.0921183	-13.2503	4.49242e-40
HOXC8	-4.23026	0.24846	-17.0259	5.27762e-65
TLL1	1.50995	0.22084	6.8373	8.07011e-12
MSR1	2.95031	0.196202	15.0371	4.1924e-51
CDH1	-1.0726	0.111874	-9.58757	9.01873e-22
DNAH5	1.59103	0.24014	6.62541	3.46279e-11
RIPOR1	1.30374	0.092137	14.1501	1.86621e-45
C6	3.35745	0.353306	9.50296	2.04013e-21
SOX30	-1.55161	0.249973	-6.20708	5.3977e-10
BEST2	-3.42338	0.368357	-9.29365	1.49087e-20
SPDL1	-1.52824	0.0838749	-18.2205	3.54775e-74
RTN4R	-1.75866	0.152344	-11.544	7.92021e-31
CDH10	1.60087	0.374507	4.27462	1.91467e-05
LSG1	-1.59751	0.101041	-15.8105	2.63447e-56
TNC	-1.85323	0.238178	-7.78086	7.20316e-15
TDP1	-1.15099	0.0773798	-14.8745	4.82509e-50
USH2A	-1.10036	0.21983	-5.00548	5.57217e-07
TG	-2.46227	0.224987	-10.9441	7.09385e-28
ADAM28	-1.00012	0.184577	-5.41846	6.01138e-08
BARX2	-4.10365	0.296628	-13.8344	1.58146e-43
DCUN1D1	-1.72589	0.139887	-12.3378	5.67084e-35
ZIC2	-5.77687	0.26641	-21.6841	2.89684e-104
LCP2	1.30147	0.150803	8.63029	6.11993e-18
TRIT1	-1.1254	0.0948815	-11.8611	1.88562e-32
ADRB1	3.63752	0.229982	15.8166	2.39207e-56
DSG2	-2.23131	0.12158	-18.3526	3.1468e-75
GPM6B	1.6792	0.155158	10.8225	2.69242e-27
MAGEC2	-8.30901	0.707862	-11.7382	8.12285e-32
PREX2	3.27914	0.172096	19.0541	6.07504e-81
ARAP2	1.0304	0.114619	8.98971	2.47882e-19
CP	-1.65074	0.269855	-6.11712	9.52789e-10
ANO2	1.84498	0.177358	10.4026	2.4137e-25
WWC3	1.34126	0.0966711	13.8744	9.0517e-44
ARHGAP6	3.20045	0.175587	18.2271	3.1447e-74
ROS1	2.65174	0.282421	9.38931	6.03929e-21
USP28	-1.05322	0.0894479	-11.7746	5.27525e-32
NOP16	-1.0404	0.0944108	-11.0199	3.06287e-28
CC2D2A	1.26952	0.0991283	12.8068	1.50106e-37
LMO3	2.95661	0.286749	10.3108	6.29813e-25
GUCA1A	-3.68334	0.282312	-13.0471	6.60463e-39
CELF2	2.55411	0.161871	15.7787	4.36039e-56
R3HDM1	-1.20584	0.071558	-16.8512	1.02855e-63
COL9A2	-1.85773	0.235008	-7.90495	2.68042e-15
EPN3	-3.68848	0.149748	-24.6312	5.85746e-134
ELN	1.82939	0.230308	7.94322	1.96993e-15
RFC2	-1.32718	0.0811042	-16.3639	3.46234e-60
NEDD4L	1.11933	0.111219	10.0642	7.95452e-24
FOXP3	-1.5312	0.163519	-9.36406	7.67291e-21
ARHGEF5	-1.00814	0.122667	-8.21855	2.05982e-16
NFE2L3	-1.41843	0.154135	-9.20253	3.49624e-20
SLC4A8	1.25554	0.203788	6.16103	7.22748e-10
LAMC3	2.1402	0.177209	12.0773	1.39261e-33
TNIP3	1.64799	0.250612	6.57584	4.83789e-11
HOMER3	-1.4945	0.125525	-11.906	1.10162e-32
RAD51	-3.43073	0.110071	-31.1683	2.86693e-213
POLQ	-4.48177	0.133866	-33.4795	9.56679e-246
THOC3	-2.33894	0.123113	-18.9984	1.75937e-80
MPHOSPH9	-1.0875	0.082974	-13.1065	3.02235e-39
FNIP2	1.84484	0.112337	16.4223	1.32352e-60
ALX4	-3.32916	0.381177	-8.73389	2.46059e-18
FSTL4	-2.0148	0.234871	-8.57833	9.62604e-18
MRTO4	-1.14063	0.0832578	-13.7	1.01514e-42
MCF2L2	-1.71926	0.180013	-9.55079	1.2871e-21
KCNQ1	1.94073	0.170224	11.401	4.13401e-30
ENTPD2	-2.39144	0.231046	-10.3505	4.16256e-25
PTPRN	-3.51116	0.266883	-13.1562	1.56788e-39
PLEKHH1	-1.3219	0.169609	-7.79381	6.50188e-15
CBLN4	2.28921	0.315666	7.25199	4.107e-13
GALC	1.2608	0.119011	10.5939	3.17944e-26
NOP58	-1.08474	0.082385	-13.1667	1.36373e-39
KCNH2	-1.30092	0.280967	-4.63015	3.65393e-06
CYFIP2	1.47342	0.161926	9.09933	9.08897e-20
CCDC85A	3.47105	0.210302	16.505	3.37537e-61
ZNF280C	-1.32862	0.10909	-12.1791	4.0174e-34
NPFFR2	-2.62917	0.487046	-5.3982	6.73123e-08
PHF21B	-2.63877	0.331396	-7.9626	1.68464e-15
GYG2	-1.53138	0.16813	-9.10832	8.3668e-20
SERPINB3	-4.83422	0.350597	-13.7886	2.98675e-43
PKP2	-1.8231	0.181434	-10.0483	9.34809e-24
ATP11B	-1.61179	0.140773	-11.4496	2.36266e-30
LAMC2	-2.03544	0.23286	-8.74105	2.30944e-18
RASGRF1	3.71968	0.262794	14.1543	1.75558e-45
CAMK2B	-3.06252	0.288953	-10.5987	3.0228e-26
NDC1	-1.52836	0.0826029	-18.5024	1.97359e-76
TBXAS1	1.65897	0.145678	11.3879	4.80459e-30
ALDH18A1	-1.26523	0.0681934	-18.5535	7.64119e-77
TARBP1	-1.20657	0.0982431	-12.2814	1.13945e-34
SLC2A3	1.15505	0.209441	5.51488	3.4901e-08
STYK1	-2.45999	0.140571	-17.5	1.43311e-68
RIMBP2	-2.11907	0.321456	-6.59209	4.33669e-11
COL11A1	-5.55141	0.271194	-20.4702	3.96666e-93
QSER1	-1.09418	0.0893937	-12.24	1.90001e-34
PRDM6	1.54588	0.178142	8.67784	4.03368e-18
SPAG4	-1.61884	0.169508	-9.55019	1.29457e-21
TNK2	-1.17149	0.13128	-8.92358	4.51453e-19
CDH3	-3.70828	0.193384	-19.1757	5.90603e-82
LTK	1.43992	0.235233	6.12125	9.28423e-10
POLD1	-1.13232	0.0968566	-11.6907	1.42157e-31
SLC6A16	1.06168	0.154637	6.86562	6.6204e-12
GPC1	-3.10171	0.172511	-17.9798	2.8044e-72
LIMCH1	3.42563	0.186109	18.4065	1.16449e-75
INTS13	-1.65855	0.0935584	-17.7274	2.57658e-70
DLX3	-2.42948	0.262302	-9.26213	2.00398e-20
SPA17	1.03638	0.126943	8.16414	3.23741e-16
TSPAN32	1.87034	0.17735	10.546	5.29889e-26
WISP2	3.38832	0.210687	16.0823	3.39509e-58
DMRT3	-4.14735	0.31664	-13.098	3.38188e-39
ST3GAL6	1.18146	0.137362	8.60104	7.89946e-18
ATP2C2	1.07358	0.213518	5.02807	4.95448e-07
NGFR	-2.53782	0.278103	-9.12548	7.14196e-20
LPAR2	-1.24374	0.0871138	-14.2771	3.03864e-46
EYA2	-3.08843	0.219815	-14.0501	7.69104e-45
FAR2	1.46771	0.158577	9.25552	2.13194e-20
POU1F1	1.90893	0.297981	6.40622	1.49169e-10
CHI3L2	3.20981	0.257565	12.4621	1.20137e-35
CALCRL	2.74525	0.147042	18.6699	8.7032e-78
ANKS1A	1.14786	0.0832427	13.7893	2.95647e-43
SLC9A3R2	2.34826	0.119342	19.6767	3.4158e-86
NTN1	-1.05055	0.205362	-5.11559	3.12765e-07
GLP2R	3.00511	0.350935	8.56315	1.09827e-17
MCM10	-4.05219	0.12586	-32.196	2.00978e-227
DGKA	-1.9446	0.124627	-15.6033	6.90881e-55
ROPN1	-4.25195	0.533257	-7.97354	1.54197e-15
ANKRD44	1.82136	0.129529	14.0614	6.55445e-45
NDUFB4	-1.08628	0.0933493	-11.6367	2.68124e-31
MYLK	1.27905	0.155268	8.23768	1.75584e-16
TMEM206	-1.55465	0.115241	-13.4905	1.7799e-41
SNAP91	-2.46152	0.32409	-7.59518	3.07364e-14
COL17A1	-6.10351	0.277938	-21.9599	6.96033e-107
SEC61A2	-1.12385	0.096711	-11.6207	3.23644e-31
PRKCQ	1.59942	0.179085	8.93107	4.21916e-19
TLE2	1.61002	0.176033	9.14611	5.90205e-20
FAM107B	1.59998	0.145198	11.0194	3.08272e-28
ME1	-1.94226	0.209067	-9.29015	1.5407e-20
MTHFD2	-1.95478	0.123075	-15.8829	8.32623e-57
SLC9A7	-1.45791	0.118464	-12.3068	8.32162e-35
PDE4A	1.15096	0.124044	9.27866	1.71627e-20
CTNNA2	-1.01681	0.412364	-2.4658	0.0136708
TIE1	2.86021	0.136999	20.8776	8.55361e-97
DIP2B	-1.20182	0.106112	-11.3259	9.76597e-30
ZMYND12	1.68426	0.178046	9.4597	3.08821e-21
SLC9A3	-3.62524	0.280168	-12.9395	2.69251e-38
NGEF	-2.96296	0.200343	-14.7894	1.71435e-49
ASPM	-4.14319	0.128171	-32.3255	3.06392e-229
SPI1	2.15006	0.151846	14.1595	1.63087e-45
MPPED2	-2.61135	0.273139	-9.56052	1.17172e-21
CLDN18	5.98306	0.338381	17.6815	5.82698e-70
KIF26A	1.01079	0.224529	4.50182	6.73743e-06
MTFR1	-1.33051	0.106664	-12.4739	1.03689e-35
MYO9A	1.26696	0.0717131	17.6671	7.51957e-70
PFKP	-1.76133	0.11603	-15.18	4.80061e-52
KLF6	2.1003	0.126484	16.6053	6.38211e-62
PHKA1	-1.38445	0.104189	-13.2879	2.72271e-40
EVI5	1.02796	0.0620039	16.5789	9.90074e-62
PKM	-1.43914	0.0950432	-15.142	8.56151e-52
TRO	-1.24371	0.174075	-7.14471	9.01879e-13
PRKCZ	1.53406	0.100118	15.3225	5.41065e-53
SYT1	-2.25007	0.210763	-10.6759	1.32036e-26
NAV3	1.20222	0.189316	6.35032	2.14867e-10
HYAL2	1.75984	0.0755647	23.2892	5.70555e-120
RASSF1	1.10663	0.080805	13.6951	1.08648e-42
FGFR3	-2.01507	0.224541	-8.97416	2.85531e-19
ACSL4	1.52952	0.123334	12.4015	2.56436e-35
PRR11	-2.94619	0.108109	-27.2521	1.5688e-163
REEP1	1.18844	0.228001	5.21245	1.86364e-07
ATP11A	2.22932	0.139513	15.9793	1.78072e-57
RASGRP2	1.91436	0.198287	9.65451	4.70394e-22
PSME4	-1.0175	0.0682408	-14.9105	2.81795e-50
PYGM	2.19937	0.141274	15.5681	1.19878e-54
PITX1	-6.80772	0.229367	-29.6804	1.3751e-193
ADGRF5	3.79796	0.177642	21.3798	2.06038e-101
SDK2	-1.69371	0.215066	-7.87528	3.39967e-15
KCNAB2	1.44083	0.116195	12.4001	2.61065e-35
ABCC9	1.90129	0.169698	11.204	3.89812e-29
GAL	-6.24335	0.314542	-19.849	1.12408e-87
MAOB	2.10971	0.202087	10.4396	1.63502e-25
DRD4	-1.68147	0.172381	-9.75443	1.76594e-22
TGFBR3	2.1169	0.175824	12.0399	2.19256e-33
PLA2G10	2.06749	0.183061	11.294	1.40454e-29
HES2	-3.26329	0.231229	-14.1128	3.1665e-45
ATP1B3	-1.6548	0.143719	-11.5141	1.11962e-30
MAPK6	-1.5489	0.105266	-14.7142	5.22901e-49
RAB27A	1.66262	0.103052	16.1338	1.47536e-58
HDHD5	-1.3747	0.0949767	-14.474	1.76814e-47
UFD1	-1.06662	0.0914415	-11.6645	1.93542e-31
SCT	-1.01143	0.202603	-4.99221	5.96918e-07
PFN2	-3.10416	0.167782	-18.5012	2.02008e-76
FGF10	2.01918	0.383745	5.26177	1.42673e-07
CLTCL1	-1.27451	0.156024	-8.16867	3.11806e-16
FSTL3	1.67655	0.194661	8.61269	7.13676e-18
POLB	-1.4363	0.142145	-10.1045	5.27786e-24
NDST1	1.55117	0.0994622	15.5956	7.80383e-55
ASNS	-2.30388	0.142852	-16.1278	1.62837e-58
CNGB1	-3.15723	0.319639	-9.87748	5.2126e-23
CHAT	-4.72061	0.509844	-9.25892	2.06505e-20
PABPC1	-1.18099	0.0892041	-13.2391	5.21424e-40
PTPN21	2.77899	0.118838	23.3847	6.11941e-121
CAMK2A	1.5273	0.225387	6.77636	1.23239e-11
EPHA8	-5.27779	0.438148	-12.0457	2.04397e-33
TRPM5	-2.03812	0.347299	-5.86848	4.39804e-09
MGAT4A	1.401	0.150426	9.31354	1.23637e-20
RPS6KA2	2.60204	0.136116	19.1163	1.84709e-81
VASH1	1.65113	0.123647	13.3536	1.1281e-40
LMCD1	1.77279	0.118603	14.9472	1.62456e-50
TRIP13	-3.65454	0.125028	-29.2297	8.13261e-188
TCF3	-1.39894	0.0905797	-15.4443	8.24008e-54
HLTF	-1.36877	0.117896	-11.61	3.66741e-31
MYO3B	-3.63068	0.295625	-12.2814	1.14055e-34
CYBRD1	2.38812	0.133936	17.8302	4.11595e-71
CDH19	1.58024	0.376589	4.19618	2.7145e-05
SLC6A15	-6.82969	0.320817	-21.2885	1.45198e-100
LIMS2	3.04599	0.144212	21.1216	5.03438e-99
LNX1	-1.34695	0.156835	-8.58828	8.82785e-18
TFRC	-1.45387	0.181601	-8.00582	1.18675e-15
RHOBTB1	1.04827	0.11612	9.02747	1.7568e-19
HMMR	-3.19801	0.13	-24.6	1.2624e-133
TRHDE	3.42974	0.389662	8.80182	1.34614e-18
STK10	1.28082	0.107172	11.951	6.41268e-33
NDE1	-1.51556	0.0988776	-15.3276	4.99839e-53
MRVI1	1.32105	0.149032	8.86418	7.70702e-19
CYP2W1	-4.61969	0.366988	-12.5881	2.45455e-36
MCM2	-3.31683	0.114505	-28.9668	1.724e-184
MOV10L1	-1.77769	0.210875	-8.43009	3.45398e-17
PANX2	-3.17173	0.226597	-13.9972	1.62081e-44
TP63	-5.70262	0.215141	-26.5065	8.16527e-155
CLCN4	1.36746	0.186424	7.33525	2.21311e-13
NLE1	-1.11057	0.0890037	-12.4778	9.87228e-36
GSDMB	-1.08127	0.166241	-6.50426	7.80785e-11
ADAM11	-2.30256	0.207247	-11.1102	1.11911e-28
FERMT2	2.0547	0.133764	15.3606	3.00754e-53
CD5L	4.2874	0.356266	12.0343	2.34712e-33
IGF2BP2	-2.60383	0.193685	-13.4437	3.35336e-41
MAP3K13	-1.19431	0.116215	-10.2768	8.96833e-25
TBX21	1.84709	0.18727	9.86326	6.00695e-23
FRY	2.53647	0.155005	16.3638	3.46974e-60
GLI2	-1.78451	0.239146	-7.46201	8.52133e-14
MRPS34	-1.00254	0.0808927	-12.3935	2.83439e-35
NOTCH3	-1.42514	0.14385	-9.90712	3.87647e-23
CLNS1A	-1.14744	0.0918742	-12.4893	8.54434e-36
PPP2R2C	-6.49312	0.250199	-25.9518	1.73332e-148
SNCB	-2.94481	0.298172	-9.87619	5.28028e-23
CA12	-3.07654	0.240273	-12.8043	1.55027e-37
MGLL	2.34144	0.16251	14.408	4.61074e-47
NTN4	2.3498	0.166406	14.1209	2.82319e-45
SCARF1	2.27669	0.124651	18.2646	1.58375e-74
ENO1	-1.26049	0.0972564	-12.9605	2.04945e-38
TXK	1.52605	0.173653	8.78797	1.52287e-18
WSCD2	-1.97988	0.333937	-5.92891	3.04949e-09
KCNQ2	-3.39591	0.402662	-8.43367	3.34999e-17
TIPIN	-1.16964	0.0899861	-12.998	1.25554e-38
NUP37	-1.26286	0.0822075	-15.3619	2.94803e-53
GTSE1	-3.8949	0.116909	-33.3158	2.28344e-243
WNT8B	-1.0496	0.241611	-4.34417	1.39806e-05
ADD2	-2.35417	0.28695	-8.20411	2.323e-16
CACNG4	1.65078	0.306121	5.39259	6.94504e-08
FSCN1	-2.60651	0.154223	-16.901	4.42587e-64
PLD1	-1.93247	0.14711	-13.1362	2.04275e-39
ATP12A	-1.80699	0.337032	-5.36146	8.25506e-08
WDR62	-3.09596	0.134911	-22.9482	1.5359e-116
DLG1	-1.21228	0.0998746	-12.138	6.64039e-34
ARHGAP15	1.43675	0.163962	8.76266	1.90689e-18
TUBA3D	-1.34003	0.194263	-6.89802	5.27338e-12
PAX2	-3.31205	0.453794	-7.29856	2.90854e-13
MCM6	-1.79103	0.0901987	-19.8565	9.68655e-88
RBMS2	2.03896	0.104753	19.4645	2.19818e-84
UNG	-1.66181	0.0816353	-20.3565	4.06873e-92
PLXNA2	1.0668	0.154274	6.91498	4.67942e-12
SPAG5	-3.45071	0.119223	-28.9433	3.41202e-184
TPD52	-1.35061	0.105108	-12.8497	8.63275e-38
ACACB	2.0105	0.119627	16.8064	2.19031e-63
TRAF4	-1.06663	0.0973264	-10.9593	5.99822e-28
PAG1	1.82744	0.13622	13.4153	4.91864e-41
MCAM	1.30083	0.136143	9.55488	1.23722e-21
RAP1GAP	1.13875	0.16494	6.90402	5.05507e-12
NMRK2	2.06801	0.334421	6.18385	6.25562e-10
ACTL6B	-2.31383	0.438084	-5.28169	1.27994e-07
UBE2T	-3.75724	0.119978	-31.316	2.82718e-215
PPP1R12B	1.55475	0.138359	11.2371	2.6816e-29
DCX	-3.33036	0.543077	-6.1324	8.6563e-10
SPAG6	2.79291	0.340451	8.20356	2.33372e-16
EXOSC5	-1.72023	0.103862	-16.5626	1.29843e-61
APBB1IP	1.60053	0.164578	9.72505	2.35795e-22
ACTN2	3.01685	0.272821	11.058	2.00532e-28
NAALAD2	1.02725	0.178716	5.74792	9.03465e-09
JADE1	1.60589	0.0994808	16.1427	1.27797e-58
SMC1B	-3.37144	0.27845	-12.1079	9.59276e-34
ITGA8	3.50098	0.188139	18.6084	2.74456e-77
CST7	1.30777	0.17174	7.61484	2.64028e-14
LAMP3	2.88473	0.189448	15.2271	2.33804e-52
FAP	-1.55035	0.191203	-8.10837	5.13034e-16
NEBL	1.74175	0.153588	11.3404	8.27671e-30
SYNJ2	-1.08263	0.0981674	-11.0284	2.78711e-28
ADCY2	-2.16456	0.331378	-6.532	6.48951e-11
RBFOX1	-2.08601	0.4703	-4.43548	9.18676e-06
HOXA9	-2.23143	0.256029	-8.71556	2.89337e-18
EDN1	2.15305	0.194437	11.0733	1.69149e-28
ADCYAP1R1	1.55916	0.256217	6.08533	1.16255e-09
ITM2A	2.36124	0.179475	13.1564	1.56421e-39
VDAC3	-1.03617	0.117458	-8.8216	1.12832e-18
BPIFB2	-1.3745	0.550521	-2.49672	0.0125348
TP73	-2.11908	0.198236	-10.6897	1.13734e-26
RUNX1T1	2.05849	0.18509	11.1216	9.85198e-29
CDH17	-1.30378	0.250711	-5.20033	1.98937e-07
TNS1	3.11228	0.138145	22.5292	2.1492e-112
CDC14A	1.07027	0.11156	9.59367	8.50088e-22
RAPGEF3	1.67567	0.157798	10.619	2.4305e-26
DUSP13	-4.02095	0.330353	-12.1717	4.40014e-34
PAFAH1B3	-2.3607	0.117977	-20.0097	4.52929e-89
KIF22	-1.64047	0.0849426	-19.3127	4.19729e-83
EPB41L2	1.24235	0.123223	10.0821	6.62802e-24
STX7	1.02257	0.0758767	13.4767	2.14389e-41
PTPRH	-3.9106	0.241166	-16.2154	3.92652e-59
EPHA6	-3.2353	0.345052	-9.37628	6.83436e-21
SCTR	2.73366	0.270199	10.1172	4.63443e-24
SLC4A4	2.96554	0.241461	12.2817	1.1361e-34
SESN1	1.40654	0.100026	14.0618	6.52118e-45
PIH1D3	3.00155	0.424118	7.07715	1.47147e-12
CPB2	4.9478	0.36771	13.4557	2.8494e-41
KCNN2	1.67308	0.178573	9.36915	7.31163e-21
CPOX	-1.47979	0.0926267	-15.9758	1.88276e-57
CLDND1	-1.05742	0.106837	-9.89751	4.26747e-23
RBL1	-1.38968	0.0867524	-16.0189	9.43004e-58
NDC80	-3.78129	0.121962	-31.0039	4.78137e-211
MAGI3	1.92682	0.110274	17.4729	2.3032e-68
CXCL2	3.89697	0.252213	15.4511	7.4133e-54
AFP	-3.56201	0.416036	-8.56179	1.1113e-17
COL4A4	2.7998	0.227431	12.3106	7.94718e-35
CDH7	-1.787	0.477806	-3.74002	0.000184003
ARG2	-1.25788	0.162683	-7.7321	1.05787e-14
MEF2C	1.92542	0.143709	13.398	6.20955e-41
PTPRC	1.61853	0.182698	8.85904	8.07061e-19
CACNA1S	2.73081	0.373275	7.31582	2.55819e-13
PKP1	-6.18691	0.232138	-26.6519	1.7007e-156
LRP2	2.5521	0.302551	8.43528	3.30416e-17
CADPS2	1.52686	0.152003	10.0449	9.67218e-24
IL12RB2	-2.61229	0.229514	-11.3818	5.15165e-30
MPP4	-2.49839	0.296097	-8.43773	3.2357e-17
PGR	2.8784	0.188014	15.3095	6.60479e-53
COL19A1	-3.28101	0.382004	-8.58892	8.77891e-18
EPB41L3	1.2883	0.179611	7.1727	7.35354e-13
KCNK2	-3.47661	0.3299	-10.5384	5.74885e-26
OPRK1	-2.87533	0.37656	-7.63578	2.2446e-14
SEMA5B	-1.4233	0.219599	-6.48137	9.0892e-11
XPO1	-1.14716	0.0727869	-15.7605	5.81929e-56
PALB2	-1.15701	0.0736162	-15.7168	1.16054e-55
GRHL2	-1.67373	0.0952423	-17.5734	3.93705e-69
PLOD1	-1.03177	0.12242	-8.42813	3.5122e-17
OXCT1	-1.03214	0.125206	-8.24355	1.67175e-16
EPYC	-4.14937	0.351974	-11.7888	4.45643e-32
ZNF671	1.08144	0.144816	7.46772	8.15954e-14
FAT1	-1.19596	0.154844	-7.72364	1.13058e-14
APLP2	1.10256	0.0966422	11.4087	3.78256e-30
NKAIN1	-5.02301	0.257532	-19.5044	1.00702e-84
COL16A1	-1.04668	0.191072	-5.47797	4.30232e-08
EFR3B	2.39051	0.208273	11.4778	1.70555e-30
KIF3C	-1.6414	0.123381	-13.3036	2.20706e-40
GCKR	-1.01613	0.226091	-4.49432	6.97936e-06
CAD	-1.56522	0.0968814	-16.156	1.0296e-58
FCN1	3.24513	0.204396	15.8767	9.19023e-57
MYNN	-1.05496	0.113715	-9.27724	1.73922e-20
PILRA	2.00976	0.155627	12.914	3.75352e-38
IGSF9	-4.74858	0.170788	-27.804	3.87823e-170
ABCB1	2.45358	0.181868	13.491	1.76748e-41
WNT11	-1.273	0.305157	-4.17161	3.02449e-05
MTIF2	-1.20538	0.0724313	-16.6416	3.47917e-62
ORC1	-3.51658	0.114823	-30.6262	5.48814e-206
RAD54L	-4.22514	0.117437	-35.9778	1.85896e-283
AQP6	-1.1474	0.244781	-4.68744	2.76639e-06
FOLH1	-2.18589	0.226007	-9.67177	3.97427e-22
EPDR1	1.61342	0.173564	9.29582	1.46076e-20
ITPKC	1.10808	0.134904	8.21384	2.1422e-16
CEACAM6	1.64762	0.301372	5.46705	4.57586e-08
FAT2	-6.01753	0.238291	-25.2528	1.05443e-140
PPEF1	-2.13424	0.196278	-10.8736	1.54078e-27
LAT2	1.66835	0.143267	11.645	2.43191e-31
MYBPC2	-1.37586	0.269039	-5.11397	3.15452e-07
NOX4	-1.32287	0.178846	-7.39665	1.39659e-13
PPP1R15A	1.81514	0.12795	14.1864	1.11271e-45
TMPRSS11E	-7.20061	0.32147	-22.399	4.02681e-111
CETP	1.92725	0.163322	11.8003	3.89006e-32
MT3	-1.25108	0.288725	-4.33312	1.4701e-05
L2HGDH	-1.29203	0.0973466	-13.2725	3.34162e-40
PTHLH	-6.82308	0.278221	-24.5239	8.20814e-133
PHACTR3	1.71352	0.284772	6.01718	1.7748e-09
TFAP2C	-2.28749	0.133884	-17.0856	1.89888e-65
AURKA	-3.23005	0.105046	-30.7488	1.26868e-207
CASS4	2.97437	0.169609	17.5366	7.52909e-69
PIR	-1.92687	0.163148	-11.8105	3.44362e-32
RFX2	1.96014	0.119818	16.3593	3.73346e-60
GP6	1.2334	0.20998	5.87391	4.25637e-09
DNMT3B	-2.68433	0.167017	-16.0722	3.99551e-58
REM1	2.0126	0.190053	10.5896	3.32835e-26
TPX2	-4.57239	0.119738	-38.1865	1.24e-05
PDRG1	-1.19109	0.0966558	-12.323	6.80768e-35
SLC15A1	-4.70898	0.235193	-20.0217	3.56096e-89
DOCK9	1.46982	0.107994	13.6103	3.47841e-42
DOCK3	-1.29375	0.223028	-5.80084	6.59829e-09
C3orf18	1.07838	0.117811	9.15347	5.51331e-20
TMEM40	-4.14632	0.202839	-20.4415	7.15131e-93
KIF9	1.1722	0.0907714	12.9138	3.76281e-38
CRLS1	1.06725	0.0782758	13.6345	2.49605e-42
SMOX	-1.93924	0.141652	-13.6902	1.16193e-42
SIGLEC1	2.1228	0.187672	11.3112	1.1549e-29
SLC4A11	-3.19833	0.208982	-15.3043	7.15398e-53
CPXM1	-1.08754	0.202515	-5.3702	7.86479e-08
F11	4.89692	0.332685	14.7194	4.84146e-49
P2RX7	1.65993	0.155121	10.7008	1.00877e-26
CFAP61	2.53017	0.245003	10.3271	5.31436e-25
LHX5	-8.42946	0.419638	-20.0875	9.50103e-90
RPH3A	1.18778	0.2843	4.17793	2.94175e-05
TRMT6	-1.13313	0.0848157	-13.3599	1.03664e-40
CHGB	-4.26733	0.340261	-12.5413	4.43473e-36
TBX5	2.21433	0.156753	14.1263	2.61674e-45
FXYD3	-1.97168	0.202966	-9.71434	2.61935e-22
BIRC5	-4.65419	0.13068	-35.6151	8.18111e-278
MLF2	-1.09107	0.0821678	-13.2786	3.08219e-40
OTUB2	-1.6014	0.143518	-11.1582	6.53325e-29
LTBP4	1.89564	0.156555	12.1085	9.52775e-34
ICAM1	2.63902	0.200372	13.1706	1.29539e-39
IRAK3	1.76961	0.165721	10.6783	1.28635e-26
LYZ	2.03015	0.230901	8.79232	1.46497e-18
TFAP4	-1.87017	0.0924293	-20.2336	4.95853e-91
FETUB	-8.14067	0.478459	-17.0144	6.4278e-65
DNAJB11	-1.64481	0.0961565	-17.1056	1.34909e-65
MCOLN1	1.04417	0.0757059	13.7925	2.82876e-43
KIF4A	-4.22979	0.110153	-38.3994	4.87e-05
DLL3	-5.72942	0.316171	-18.1213	2.16468e-73
DTX2	-1.2015	0.116417	-10.3206	5.68683e-25
NLRC4	2.79242	0.130434	21.4086	1.11124e-101
PUS7	-1.78801	0.0983325	-18.1833	7.00374e-74
NRCAM	-2.87028	0.252705	-11.3582	6.75031e-30
SLC26A3	1.085	0.277176	3.91447	9.06014e-05
IL5RA	2.8455	0.251913	11.2956	1.38013e-29
ABCC6	2.41125	0.15942	15.1252	1.10471e-51
ITGA6	-1.67495	0.162104	-10.3326	5.01964e-25
RAPGEF4	1.63991	0.126523	12.9614	2.02631e-38
SMPX	-2.16907	0.322467	-6.72649	1.73802e-11
TF	-1.82202	0.28712	-6.34584	2.21209e-10
APOH	3.7864	0.443327	8.54086	1.33231e-17
ORC6	-3.98537	0.118865	-33.5286	1.84714e-246
ZFHX4	-2.26195	0.267287	-8.46262	2.61439e-17
CPA1	1.39261	0.31638	4.40171	1.07401e-05
RGS17	-2.21097	0.214631	-10.3013	6.95508e-25
CMA1	2.615	0.264225	9.89688	4.29476e-23
JPH4	2.42775	0.234556	10.3504	4.16651e-25
MYH7	-2.96388	0.391605	-7.56855	3.77426e-14
SLC7A8	-1.49887	0.213187	-7.03079	2.0537e-12
GEMIN2	-1.10558	0.101884	-10.8513	1.96648e-27
TGM1	-1.21362	0.288969	-4.19981	2.67135e-05
DAZL	-1.85312	0.321965	-5.75565	8.63081e-09
WDR76	-1.57208	0.144766	-10.8594	1.79857e-27
CAPN3	1.75035	0.166149	10.5348	5.96795e-26
TBX15	-1.63532	0.224926	-7.27049	3.58182e-13
PHGDH	-2.45974	0.161793	-15.203	3.37789e-52
COL9A3	-3.36276	0.289494	-11.616	3.4171e-31
TEKT2	2.6428	0.269783	9.79604	1.17088e-22
CLSPN	-2.8997	0.131392	-22.069	6.2816e-108
UNC13D	1.80233	0.179232	10.0558	8.65833e-24
DPYSL2	2.86629	0.134313	21.3404	4.78541e-101
TGFB2	1.16551	0.220858	5.27717	1.31195e-07
CDC45	-4.49258	0.129905	-34.5836	4.45043e-262
ADA2	1.49196	0.16666	8.95213	3.48699e-19
VNN3	1.11117	0.2929	3.79367	0.000148437
SEC22C	1.05154	0.0596421	17.6308	1.42967e-69
XYLB	-1.77388	0.129544	-13.6933	1.11376e-42
GABRP	-3.72478	0.359419	-10.3633	3.64058e-25
KRT31	-9.44442	0.441936	-21.3705	2.51162e-101
CDC6	-4.05769	0.120125	-33.7788	4.03297e-250
FMO2	3.24998	0.232135	14.0004	1.55002e-44
MSH2	-1.2917	0.094428	-13.6792	1.35261e-42
SH2D3C	2.92123	0.125283	23.3171	2.97616e-120
TLL2	-3.41697	0.24334	-14.042	8.62671e-45
CYP26A1	-5.78702	0.36931	-15.6698	2.43206e-55
SORBS1	2.75686	0.153575	17.9512	4.69281e-72
CRTAC1	3.3356	0.28563	11.678	1.65075e-31
IL11	-2.4606	0.222561	-11.0558	2.05405e-28
MYO3A	-2.87884	0.357337	-8.05637	7.85956e-16
TPSD1	2.05728	0.299959	6.85853	6.95706e-12
SMIM24	-2.79761	0.276905	-10.1031	5.35125e-24
TREM2	1.40465	0.184549	7.61127	2.71418e-14
FKBP5	1.19327	0.157151	7.59316	3.12188e-14
SRPK1	-1.42994	0.0783329	-18.2546	1.90131e-74
PGC	4.68983	0.387656	12.0979	1.08315e-33
TMEM14A	-1.76007	0.131943	-13.3396	1.36103e-40
NCR2	-1.59025	0.384437	-4.13657	3.52531e-05
DSP	-3.89027	0.148108	-26.2664	4.64325e-152
IL12RB1	1.17487	0.174042	6.75051	1.47329e-11
ACOT7	-1.00402	0.110565	-9.08085	1.07734e-19
CDC7	-1.65714	0.106415	-15.5724	1.12054e-54
SYDE2	1.23561	0.149583	8.26041	1.45177e-16
ERMP1	-1.00076	0.149307	-6.70267	2.04642e-11
NRP1	1.61121	0.130536	12.343	5.31274e-35
PRTFDC1	-1.44404	0.136097	-10.6104	2.66623e-26
PALMD	1.71636	0.171406	10.0134	1.33069e-23
H2AFY2	-1.74669	0.136253	-12.8195	1.275e-37
FBXL19	-1.557	0.104351	-14.9209	2.4115e-50
MAGEB2	-8.87944	0.612045	-14.5078	1.08108e-47
EFNA2	-5.31236	0.437875	-12.1321	7.13679e-34
CBARP	-1.61086	0.166445	-9.67801	3.73933e-22
IGFALS	2.7638	0.238704	11.5784	5.30323e-31
MISP	1.13507	0.206052	5.50865	3.61589e-08
HCN2	-1.84454	0.189225	-9.74788	1.8837e-22
GADD45B	2.73899	0.150078	18.2505	2.05102e-74
TRMT2A	-1.04373	0.0920424	-11.3397	8.34731e-30
RANBP1	-1.86291	0.0993068	-18.7591	1.63011e-78
SERPIND1	2.18296	0.359702	6.0688	1.28867e-09
MMP11	-5.64147	0.229581	-24.5729	2.46258e-133
SMARCB1	-1.07352	0.0769208	-13.9562	2.88292e-44
DERL3	-1.1123	0.210189	-5.2919	1.21053e-07
SUSD2	4.57107	0.235024	19.4494	2.94866e-84
SEC14L2	-1.83275	0.181672	-10.0882	6.23008e-24
SEC14L3	4.55557	0.342133	13.3152	1.88811e-40
UPB1	1.30061	0.241464	5.38636	7.18993e-08
YPEL1	1.07697	0.18247	5.90217	3.58741e-09
PES1	-1.18225	0.0885849	-13.346	1.25055e-40
GGT1	1.28117	0.175555	7.29781	2.92486e-13
PRODH	1.18593	0.199813	5.93518	2.93515e-09
SLC35E4	-1.00169	0.129862	-7.71351	1.22401e-14
CRYBB3	-2.55008	0.211191	-12.0747	1.4364e-33
CYTH4	1.0051	0.150396	6.68306	2.34008e-11
MFNG	2.19433	0.144709	15.1637	6.15125e-52
CARD10	-1.30491	0.173228	-1.76015	0.028383
LGALS2	1.2243	0.192494	6.36018	2.01514e-10
SH3BP1	-1.66439	0.110839	-15.0163	5.74315e-51
SEZ6L	-1.30456	0.402364	-3.24224	0.00118595
GCAT	-1.61915	0.134172	-12.0677	1.56439e-33
GGTLC2	4.18669	0.27398	15.281	1.02317e-52
MICALL1	-1.42978	0.127955	-11.1741	5.45775e-29
TTC28	1.45736	0.130851	11.1375	8.2383e-29
SLC16A8	-2.36548	0.196081	-12.0638	1.64074e-33
CENPM	-3.00723	0.120068	-25.0461	1.92303e-138
43346	-1.94379	0.201986	-9.62343	6.3674e-22
SLC5A4	2.4619	0.228457	10.7762	4.45989e-27
KDELR3	-1.21901	0.145258	-8.39202	4.77874e-17
CYP2D6	-1.09574	0.182607	-6.00053	1.9668e-09
DMC1	-1.90081	0.187006	-10.1644	2.85825e-24
TCF20	-1.0562	0.0929438	-11.3639	6.32577e-30
TOMM22	-1.10399	0.0988828	-11.1646	6.07757e-29
RSPH14	1.18252	0.212577	5.56278	2.65507e-08
TIMP3	2.08782	0.2252	9.27098	1.84437e-20
MIOX	-3.49137	0.307984	-11.3362	8.6847e-30
RHBDD3	-1.33987	0.0875128	-15.3106	6.49594e-53
NEFH	-1.61497	0.321493	-5.02336	5.07761e-07
BIK	-2.84351	0.168863	-16.8391	1.26106e-63
MCM5	-1.61753	0.0929129	-17.4091	7.03937e-68
RASD2	-1.50233	0.24678	-6.08773	1.14519e-09
TTLL12	-2.1971	0.116967	-18.7839	1.02353e-78
CBX7	1.80188	0.106364	16.9407	2.25404e-64
PDGFB	1.55936	0.146514	10.6431	1.87841e-26
ACR	1.40418	0.177541	7.90904	2.5939e-15
CABP7	-1.49163	0.176639	-8.44452	3.05293e-17
PNPLA5	-5.42574	0.516991	-10.4949	9.12208e-26
PNPLA3	-1.09882	0.210633	-5.21673	1.82112e-07
CACNA1I	-1.89403	0.252571	-7.49901	6.43016e-14
FOXRED2	-1.54037	0.125745	-12.25	1.68057e-34
GRAP2	1.41313	0.160447	8.80748	1.27986e-18
NCF4	1.43727	0.153463	9.36562	7.56062e-21
CSF2RB	1.2065	0.209718	5.75298	8.76832e-09
RANGAP1	-1.46802	0.0872025	-16.8347	1.35968e-63
PHF5A	-1.08797	0.101253	-10.745	6.25287e-27
TRMU	-1.31897	0.0904875	-14.5763	3.97538e-48
MLC1	1.32081	0.253681	5.2066	1.92328e-07
KCNK10	-3.28361	0.387833	-8.46657	2.52729e-17
CTSG	2.49541	0.259244	9.6257	6.2281e-22
GZMH	1.30368	0.211333	6.16884	6.87931e-10
COCH	-4.12232	0.27521	-14.9788	1.0098e-50
POLE2	-2.70253	0.122506	-22.0604	7.5971e-108
CDKL1	1.64462	0.128646	12.784	2.01392e-37
TRIM9	-2.79726	0.248977	-11.235	2.74349e-29
GNPNAT1	-1.07363	0.099514	-10.7887	3.89263e-27
CDKN3	-3.59426	0.136634	-26.3058	1.64621e-152
PLEK2	-3.14721	0.223039	-14.1106	3.2701e-45
LRRC74A	1.96231	0.228386	8.59211	8.53853e-18
ISM2	-5.1215	0.302592	-16.9255	2.92093e-64
RIN3	1.37088	0.123638	11.0878	1.43778e-28
CHGA	-2.90826	0.357584	-8.13309	4.18482e-16
SIX4	-2.2779	0.13272	-17.1632	5.00803e-66
GALNT16	2.13042	0.25037	8.50909	1.75296e-17
SERPINA4	-4.77332	0.536461	-8.89779	5.69676e-19
SLC8A3	2.61907	0.254531	10.2898	7.8372e-25
VRK1	-1.49737	0.102936	-14.5467	6.12827e-48
EFS	-1.85409	0.136562	-13.577	5.485e-42
DHRS2	-3.00618	0.308606	-9.74115	2.01268e-22
CPNE6	-1.00029	0.353055	-2.83324	0.0046079
NFKBIA	1.53011	0.126815	12.0656	1.60473e-33
EMC9	-1.14904	0.0980298	-11.7214	9.90482e-32
GSS	-1.17843	0.0830061	-14.1969	9.5729e-46
MMP9	-2.34838	0.234788	-10.0021	1.49132e-23
VSX1	-2.19901	0.398946	-5.51205	3.54674e-08
GINS1	-3.95459	0.11747	-33.6647	1.9e-248
MYBL2	-4.71191	0.129164	-36.4801	2.29072e-291
RAB5IF	-1.58215	0.111114	-14.239	5.24432e-46
NFATC2	1.83383	0.174223	10.5257	6.57387e-26
PABPC1L	-1.76336	0.172191	-10.2407	1.30232e-24
SALL4	-3.96175	0.215784	-18.3598	2.75634e-75
PFDN4	-1.12736	0.103309	-10.9125	1.00457e-27
BMP7	-4.14759	0.214317	-19.3526	1.93826e-83
RAE1	-1.47044	0.0756455	-19.4385	3.64569e-84
NELFCD	-1.19235	0.0752871	-15.8374	1.71775e-56
TUBB1	3.58283	0.146287	24.4918	1.80478e-132
SLCO4A1	1.11203	0.219202	5.0731	3.91394e-07
NTSR1	-1.32089	0.348606	-3.78905	0.000151224
MRGBP	-1.62295	0.0816425	-19.8788	6.2145e-88
GID8	-1.00583	0.0687668	-14.6267	1.89757e-48
BIRC7	1.0148	0.222584	4.55918	5.13547e-06
NKAIN4	-2.11812	0.298859	-7.08737	1.36684e-12
COL20A1	-2.48804	0.37399	-6.65268	2.8781e-11
EEF1A2	-5.13357	0.357836	-14.3461	1.12632e-46
PTK6	-1.59635	0.218985	-7.28979	3.10434e-13
SPEF1	2.29961	0.243846	9.4306	4.07765e-21
TRIB3	-1.7326	0.172567	-10.0401	1.01533e-23
RASSF2	2.0969	0.172283	12.1713	4.42142e-34
SLC52A3	-1.30172	0.169097	-7.69809	1.38112e-14
ANGPT4	4.46597	0.223398	19.9911	6.58757e-89
RSPO4	2.0785	0.290953	7.14375	9.08198e-13
SIRPB1	3.29751	0.20279	16.2607	1.87588e-59
FERMT1	-4.2627	0.160805	-26.5084	7.74957e-155
CCM2L	2.90896	0.145416	20.0045	5.0346e-89
MYL9	1.84239	0.154844	11.8984	1.20652e-32
HCK	1.15821	0.159214	7.27454	3.47602e-13
SAMHD1	1.75886	0.122845	14.3177	1.69642e-46
PAK5	-3.39927	0.328905	-10.3351	4.88803e-25
NOP56	-1.36526	0.0865556	-15.7732	4.75637e-56
JAG1	-2.23926	0.159057	-14.0783	5.16466e-45
OXT	-1.45705	0.306602	-4.75226	2.0116e-06
E2F1	-1.91296	0.117751	-16.2458	2.39119e-59
PXMP4	1.71395	0.106085	16.1565	1.02257e-58
BPI	1.45517	0.243389	5.9788	2.24786e-09
CST3	1.08738	0.102399	10.6191	2.4301e-26
ASIP	-1.09126	0.200704	-5.43718	5.41315e-08
CST4	-6.91877	0.465905	-14.8502	6.93823e-50
AHCY	-1.66407	0.107843	-15.4305	1.01999e-53
PPP1R16B	1.97943	0.185509	10.6703	1.40232e-26
FAM83D	-3.65038	0.142659	-25.5882	2.06546e-144
EPPIN	2.73589	0.435459	6.28277	3.32603e-10
DHX35	-1.00525	0.101705	-9.88394	4.88709e-23
SYNDIG1	-2.04155	0.225616	-9.04876	1.44599e-19
LPIN2	1.51003	0.131436	11.4888	1.5027e-30
MYOM1	1.55811	0.162035	9.6159	6.85056e-22
CEP76	-1.19341	0.0974894	-12.2414	1.86705e-34
ST8SIA5	-1.06207	0.263207	-4.0351	5.45791e-05
SMAD7	1.63232	0.12037	13.5608	6.83673e-42
LAMA1	-3.6399	0.281436	-12.9333	2.9195e-38
RNF125	1.79503	0.129651	13.8451	1.36254e-43
NOL4	-1.3064	0.415948	-3.14077	0.00168506
RBBP8	-1.38704	0.122942	-11.2821	1.60865e-29
CSTF2	-1.43272	0.0919906	-15.5746	1.08351e-54
H2BFM	-5.18701	0.45323	-11.4446	2.50374e-30
MXRA5	-1.52668	0.196543	-7.76768	7.9939e-15
STS	1.58251	0.142139	11.1336	8.61206e-29
TBL1X	-1.24061	0.129015	-9.616	6.84426e-22
GPR143	-1.45047	0.207423	-6.99282	2.69412e-12
PRPS2	-1.18161	0.0958144	-12.3323	6.06746e-35
TLR8	2.2826	0.212137	10.7601	5.31337e-27
AMMECR1	-1.37165	0.105591	-12.9902	1.39101e-38
CHRDL1	3.725	0.260327	14.3089	1.92422e-46
SUV39H1	-1.32812	0.0880034	-15.0916	1.83798e-51
SRPX	1.61247	0.210155	7.67276	1.6833e-14
GLRA2	-1.70646	0.348385	-4.89821	9.67118e-07
MCF2	-2.19064	0.305621	-7.16785	7.61856e-13
SYP	1.33772	0.178921	7.47662	7.62565e-14
PLP2	-1.28503	0.11235	-11.4377	2.7087e-30
BMX	1.9984	0.2252	8.8739	7.0628e-19
RENBP	1.13671	0.140248	8.10499	5.27486e-16
ZC3H12B	1.58906	0.139049	11.428	3.02914e-30
SCML2	-2.18957	0.212693	-10.2945	7.45712e-25
RS1	5.1723	0.25089	20.6158	1.97864e-94
PCSK1N	-1.25733	0.288964	-4.35116	1.35422e-05
RAB40AL	-1.79401	0.273381	-6.5623	5.29853e-11
PGK1	-1.28108	0.11079	-11.5632	6.33411e-31
GATA1	2.41709	0.15877	15.2238	2.45655e-52
SMS	-1.38915	0.114888	-12.0914	1.17317e-33
GPR50	-7.91916	0.512329	-15.4572	6.75032e-54
CD40LG	2.1058	0.221809	9.49375	2.22878e-21
KLHL4	1.12867	0.270842	4.16727	3.08275e-05
GABRE	-2.54454	0.232323	-10.9526	6.4596e-28
FGD1	-1.02698	0.110339	-9.30751	1.30859e-20
PORCN	-1.06401	0.129964	-8.18694	2.6795e-16
ITIH6	-3.24827	0.250517	-12.9663	1.90081e-38
SRPX2	-1.36944	0.168479	-8.12826	4.3551e-16
ZDHHC15	1.63251	0.222269	7.34477	2.06109e-13
CENPI	-3.32624	0.111131	-29.9308	7.82555e-197
DRP2	-2.40174	0.192555	-12.473	1.04786e-35
TAF7L	-3.13959	0.264788	-11.857	1.97894e-32
NALCN	1.12293	0.208686	5.38096	7.40915e-08
FGF14	1.78349	0.227237	7.84858	4.2076e-15
MLNR	-1.1526	0.282558	-4.07917	4.51961e-05
CAB39L	1.71443	0.13802	12.4216	1.99451e-35
KLF5	-1.38711	0.154818	-8.95965	3.25714e-19
ACP5	1.96069	0.136437	14.3707	7.90057e-47
FGF9	2.01173	0.281583	7.14437	9.04124e-13
SGCG	2.53565	0.301532	8.40921	4.12771e-17
FLT1	1.28138	0.114635	11.1779	5.22978e-29
RGCC	3.52264	0.137613	25.5982	1.59614e-144
DHRS12	1.0902	0.0962271	11.3295	9.37486e-30
MEDAG	1.18252	0.203967	5.7976	6.72722e-09
TSC22D1	1.16719	0.112061	10.4157	2.10249e-25
OLFM4	-4.93171	0.400682	-12.3083	8.174e-35
MSLN	1.99847	0.336798	5.93373	2.96136e-09
HSF4	-1.24758	0.170971	-7.297	2.9426e-13
ELMO3	-1.04996	0.118081	-8.89184	6.01035e-19
TSNAXIP1	1.485	0.180269	8.23772	1.75524e-16
PLLP	2.14297	0.139357	15.3776	2.31418e-53
ZNF423	1.79415	0.189536	9.466	2.90757e-21
CCL17	1.21672	0.222952	5.45731	4.83412e-08
HAS3	-1.95161	0.223365	-8.73731	2.38725e-18
SMPD3	1.23499	0.18595	6.64154	3.10415e-11
NECAB2	-3.52178	0.3246	-10.8496	2.00286e-27
WFDC1	2.5912	0.164642	15.7384	8.25311e-56
CRISPLD2	1.43793	0.169621	8.47734	2.30395e-17
NME4	-1.15713	0.104098	-11.1158	1.05157e-28
ABCC1	-1.94731	0.174523	-11.1579	6.55134e-29
FOXF1	2.90103	0.155969	18.6	3.21143e-77
SLC7A5	-3.41322	0.174098	-19.6051	1.39749e-85
RHBDL1	-2.74496	0.185497	-14.7978	1.51297e-49
ZP2	1.83928	0.3633	5.0627	4.13354e-07
MEFV	1.91843	0.179573	10.6833	1.21862e-26
CRYM	2.05263	0.304631	6.73809	1.60481e-11
PRSS33	1.02223	0.323534	3.15957	0.00158
AQP8	1.26427	0.254659	4.96457	6.88524e-07
USP31	-1.40696	0.112729	-12.4809	9.48634e-36
SALL1	-5.62865	0.422475	-13.3231	1.70005e-40
MAZ	-1.06284	0.0801925	-13.2536	4.29939e-40
TMC5	2.0734	0.25032	8.28301	1.20098e-16
SLC6A2	-4.42599	0.337901	-13.0985	3.35854e-39
KNOP1	-1.31611	0.0754381	-17.4462	3.67778e-68
AQP9	2.2575	0.208734	10.8152	2.91653e-27
CORO2B	2.36299	0.196589	12.02	2.79105e-33
RASL12	2.47279	0.139896	17.6759	6.42871e-70
AP3B2	-3.13751	0.224753	-13.9598	2.74202e-44
ACSBG1	1.04343	0.22349	4.66882	3.02937e-06
CTSH	2.27021	0.162608	13.9612	2.68873e-44
CEMIP	-1.0711	0.20283	-5.28079	1.2863e-07
ZNF106	1.41734	0.0801009	17.6945	4.62686e-70
CEP152	-1.34548	0.111386	-12.0795	1.35614e-33
OCA2	-1.86791	0.334362	-5.58648	2.31721e-08
TGM5	-5.73429	0.317231	-18.0761	4.9178e-73
FAM189A1	2.44135	0.27846	8.76735	1.82926e-18
TJP1	1.25311	0.0870347	14.3978	5.34332e-47
RHOV	-4.44373	0.191309	-23.2281	2.37123e-119
OIP5	-3.48936	0.123168	-28.3301	1.47025e-176
RP1	2.65198	0.358615	7.39507	1.41332e-13
EYA1	-1.05163	0.287218	-3.66144	0.000250802
TRPA1	-3.14705	0.273446	-11.5088	1.19088e-30
CPQ	1.20697	0.131342	9.18951	3.94639e-20
CALB1	-6.81322	0.435562	-15.6424	3.74563e-55
SFRP1	-1.52093	0.335389	-4.53482	5.76519e-06
LAPTM4B	-1.33314	0.117943	-11.3033	1.26418e-29
POP1	-1.36064	0.097201	-13.9982	1.5983e-44
PLAT	-1.38799	0.229291	-6.05338	1.41837e-09
DKK4	-4.88266	0.416776	-11.7153	1.06396e-31
GDAP1	-1.20013	0.135092	-8.88378	6.46252e-19
ESRP1	-1.62972	0.0853241	-19.1003	2.50858e-81
WISP1	-1.71258	0.195323	-8.76792	1.81996e-18
NDRG1	-2.10071	0.178956	-11.7387	8.07235e-32
STMN2	-1.55151	0.302235	-5.13345	2.84471e-07
TRPS1	-1.07954	0.135327	-7.97723	1.49648e-15
NCALD	1.17935	0.176025	6.69988	2.08592e-11
GSDMC	1.23201	0.103635	2.23868	0.0251765
PYCR3	-1.51165	0.101712	-14.862	5.81455e-50
GSR	-1.35519	0.164815	-8.22249	1.99322e-16
NEFM	-3.2424	0.421194	-7.69812	1.3808e-14
TUSC3	-1.12445	0.149624	-7.51517	5.68391e-14
ARHGEF10	1.86884	0.129503	14.4308	3.31141e-47
MCM4	-2.98161	0.0975428	-30.5672	3.34133e-205
ASAH1	1.89307	0.0989149	19.1384	1.20936e-81
KCNN4	-1.44346	0.2394	-6.0295	1.6447e-09
LHB	-1.69997	0.219657	-7.7392	1.00041e-14
TUBB4A	-3.24542	0.286787	-11.3165	1.08738e-29
SARS2	-1.5364	0.116264	-13.2148	7.20953e-40
KCNA7	-3.69984	0.293945	-12.5869	2.49375e-36
FCGRT	1.60205	0.102389	15.6467	3.49688e-55
CKM	-1.40235	0.261823	-5.35611	8.50314e-08
PPP1R13L	-1.07146	0.158009	-6.78102	1.19328e-11
SLC17A7	-1.67702	0.274121	-6.11781	9.48698e-10
RNASEH2A	-2.25088	0.107672	-20.9051	4.81484e-97
KLC3	-3.38381	0.175635	-19.2662	1.03249e-82
CD37	1.73056	0.173797	9.95738	2.34146e-23
AMH	-2.63719	0.298605	-8.83169	1.03109e-18
LYL1	1.58162	0.130406	12.1285	7.46183e-34
TRMT1	-1.00648	0.0957944	-10.5067	8.04824e-26
RETN	4.76404	0.267441	17.8134	5.55901e-71
CLEC4M	4.66123	0.313976	14.8458	7.40625e-50
RSPH6A	-1.9982	0.413941	-4.82724	1.38435e-06
IL4I1	-1.50466	0.18474	-8.14475	3.80076e-16
NOVA2	3.00222	0.143546	20.9147	3.93883e-97
LILRB1	1.2376	0.169495	7.3017	2.84157e-13
LILRA1	2.28791	0.164707	13.8908	7.20643e-44
TIMM44	-1.00126	0.0875371	-11.4381	2.6974e-30
ASF1B	-3.26843	0.12032	-27.1645	1.70684e-162
TNNT1	-3.11928	0.265586	-11.7449	7.50197e-32
OLFM2	-1.14168	0.180514	-6.32464	2.53831e-10
EPHX3	-1.6785	0.261737	-6.41293	1.42745e-10
CASP14	-8.61214	0.530671	-16.2288	3.1573e-59
SLC1A6	-7.98456	0.460221	-17.3494	1.99289e-67
CCNE1	-3.86338	0.153237	-25.2118	2.97079e-140
PDCD5	-1.54128	0.108282	-14.2339	5.64198e-46
TIMM50	-1.11447	0.111711	-9.97633	1.93485e-23
FBL	-1.63568	0.117379	-13.935	3.88092e-44
CLC	1.19754	0.381097	3.14234	0.00167603
CNTD2	-3.36294	0.284637	-11.8148	3.27255e-32
GPI	-1.96479	0.120475	-16.3088	8.54975e-60
PRX	3.98861	0.161537	24.6917	1.31471e-134
NUMBL	-1.03404	0.119515	-8.65202	5.05969e-18
FSD1	-3.71137	0.249186	-14.894	3.60625e-50
OVOL3	-2.20816	0.203831	-10.8333	2.39312e-27
SLC1A5	-1.41539	0.111791	-12.6611	9.71469e-37
TJP3	1.1875	0.229934	5.16452	2.41051e-07
DENND3	2.38261	0.145186	16.4108	1.60213e-60
CEACAM4	1.99436	0.188851	10.5605	4.5427e-26
MRPL4	-1.09026	0.0957914	-11.3816	5.16419e-30
SIGLEC8	1.00837	0.228595	4.41115	1.02821e-05
NKG7	1.44589	0.196543	7.35664	1.88597e-13
ICAM5	1.30078	0.221708	5.86706	4.43583e-09
CD33	2.1936	0.160586	13.66	1.75955e-42
CEACAM5	-2.32552	0.361527	-6.43249	1.25529e-10
CNFN	-4.88335	0.268771	-18.1692	9.04782e-74
GRIN2D	-3.00013	0.234972	-12.768	2.47391e-37
SYNGR4	-2.7002	0.285465	-9.45896	3.11034e-21
CCDC114	1.89098	0.217262	8.70369	3.21271e-18
CARD8	1.28349	0.0948964	13.5252	1.11065e-41
LIG1	-1.47294	0.0936162	-15.7339	8.864e-56
SIGLEC6	2.42884	0.219725	11.054	2.097e-28
PLA2G4C	1.35872	0.148709	9.13677	6.43446e-20
SIGLEC5	2.17507	0.199543	10.9002	1.14972e-27
HAS1	3.13163	0.294196	10.6447	1.84548e-26
CAPS	1.83806	0.210709	8.72325	2.70335e-18
RASIP1	2.13266	0.182088	11.7123	1.10244e-31
THEG	-3.89907	0.370933	-10.5115	7.6452e-26
FGF21	-3.95837	0.507181	-7.80464	5.96731e-15
LILRB5	1.8023	0.184692	9.75842	1.69783e-22
MAST1	-3.627	0.208039	-17.4342	4.53529e-68
SLC5A5	-1.23807	0.316618	-3.91029	9.21838e-05
KCNN1	-2.59459	0.264291	-9.81718	9.4965e-23
ARRDC2	1.50174	0.106441	14.1086	3.36093e-45
PIK3R2	-1.34662	0.107083	-12.5754	2.88282e-36
PDE4C	2.17126	0.209653	10.3565	3.91189e-25
ISYNA1	-1.17151	0.153863	-7.61399	2.6577e-14
UPK1A	-3.19243	0.342996	-9.30748	1.30901e-20
DDX49	-1.08072	0.0830919	-13.0063	1.12626e-38
ATP4A	-6.23292	0.432342	-14.4167	4.06585e-47
GAPDHS	-1.65354	0.369875	-4.47053	7.80273e-06
MAG	2.43704	0.372439	6.54346	6.01115e-11
LSR	-1.33297	0.106601	-12.5043	7.06978e-36
HPN	1.47593	0.276712	5.3338	9.61792e-08
GRIK5	-1.31429	0.255838	-5.13719	2.78872e-07
CADM4	-1.79225	0.143199	-12.5158	6.12132e-36
RUNDC3B	1.80785	0.194692	9.28573	1.60606e-20
CFAP69	1.00681	0.127412	7.902	2.74472e-15
RASA4	1.41585	0.133156	10.633	2.09268e-26
CDK6	-1.21015	0.152472	-7.93688	2.07326e-15
DNAJC2	-1.15921	0.0889136	-13.0375	7.49058e-39
PIK3CG	1.41007	0.200309	7.03945	1.93004e-12
PON3	1.13066	0.258429	4.37512	1.21364e-05
ITGB8	-2.40069	0.163281	-14.7028	6.18352e-49
DUS4L	-1.36093	0.0851261	-15.9873	1.56776e-57
DLX5	-6.28068	0.25277	-24.8474	2.75603e-136
STEAP1B	-3.33125	0.256165	-13.0044	1.15577e-38
PTN	-1.18121	0.252862	-4.67137	2.99202e-06
MPP6	-1.27785	0.117125	-10.9101	1.03149e-27
GSDME	-1.35178	0.171246	-7.89383	2.93047e-15
TFEC	1.48457	0.186977	7.93984	2.02446e-15
CAV2	1.81401	0.137771	13.1669	1.36111e-39
CAV1	3.19451	0.18673	17.1077	1.30123e-65
WNT2	1.41317	0.210081	6.72678	1.73462e-11
HOXA1	-3.08386	0.154823	-19.9186	2.8046e-88
HOXA5	1.88403	0.130114	14.4799	1.62349e-47
ANKRD7	-2.27236	0.25311	-8.97773	2.7641e-19
VIPR2	1.39079	0.296093	4.69713	2.63848e-06
TSPAN12	2.69705	0.174535	15.4528	7.22785e-54
HOXA13	-8.14302	0.370786	-21.9615	6.72616e-107
CPED1	2.75687	0.185807	14.8372	8.41579e-50
EVX1	-4.81555	0.483948	-9.95056	2.50758e-23
CPVL	1.17374	0.17967	6.53278	6.45581e-11
COBL	2.77381	0.234357	11.8358	2.54756e-32
STX1A	-1.95586	0.138331	-14.1389	2.18663e-45
NOD1	1.17729	0.0808809	14.5559	5.35806e-48
GARS	-1.1705	0.0873145	-13.4056	5.60677e-41
CRHR2	-1.38232	0.260788	-5.30053	1.15469e-07
MINDY4	1.12154	0.118675	9.45048	3.37289e-21
CHCHD2	-1.00337	0.125941	-7.96702	1.6255e-15
CCL24	2.55664	0.256184	9.97967	1.87081e-23
HSPB1	-2.04505	0.148693	-13.7535	4.84969e-43
NPTX2	-2.52873	0.30415	-8.31409	9.24561e-17
PTCD1	-1.01349	0.0924585	-10.9615	5.85105e-28
CYP3A5	1.4333	0.233018	6.15105	7.69711e-10
EIF3B	-1.18335	0.0774829	-15.2724	1.16823e-52
NUDT1	-1.93025	0.102762	-18.7837	1.02734e-78
PTPRZ1	-4.83201	0.2497	-19.3512	1.98959e-83
HYAL4	-1.32038	0.367703	-3.59088	0.000329562
AIMP2	-1.17004	0.0877763	-13.3298	1.55402e-40
TFR2	-3.16985	0.192679	-16.4515	8.18357e-61
PPP1R17	2.72577	0.338075	8.06261	7.46795e-16
LSM5	-1.12765	0.0874129	-12.9003	4.48222e-38
AP1S1	-1.25104	0.10882	-11.4965	1.37396e-30
GLCCI1	1.13219	0.129039	8.774	1.72431e-18
EZH2	-3.14608	0.119857	-26.2486	7.41354e-152
MEST	-1.36432	0.151472	-9.00703	2.11715e-19
MEOX2	2.22492	0.205955	10.803	3.33231e-27
POU6F2	-4.92056	0.241075	-20.4109	1.33726e-92
TSPAN13	1.60167	0.125776	12.7343	3.8141e-37
RARRES2	1.27076	0.171273	7.41951	1.17555e-13
GIMAP2	1.51537	0.16027	9.45511	3.22683e-21
POLD2	-1.3042	0.0880656	-14.8094	1.27445e-49
MYL7	-2.73934	0.424295	-6.45622	1.07349e-10
GCK	-1.17502	0.252688	-4.6501	3.31779e-06
SPATA6L	1.2997	0.140311	9.26301	1.98749e-20
SLC1A1	3.43346	0.185174	18.5418	9.50071e-77
LHX2	-6.55562	0.326943	-20.0513	1.96749e-89
CNTNAP3	-1.03981	0.214157	-4.85535	1.20173e-06
TMEM245	1.14242	0.0850159	13.4377	3.63617e-41
PRUNE2	1.94461	0.204036	9.53069	1.56238e-21
C5	2.1582	0.173564	12.4346	1.6962e-35
OGN	4.14007	0.263482	15.7129	1.23412e-55
ECM2	1.94352	0.162082	11.991	3.96034e-33
LHX6	1.1313	0.161804	6.9918	2.71382e-12
PTGR1	-2.36691	0.238952	-9.90537	3.94522e-23
AMBP	1.03922	0.314108	3.30849	0.000938022
AKNA	1.27212	0.13841	9.19092	3.8948e-20
TNFSF8	1.29649	0.193505	6.70001	2.08409e-11
DNM1	-1.51505	0.164476	-9.21134	3.22087e-20
ENG	2.43292	0.123814	19.6498	5.80695e-86
AK1	2.41768	0.108558	22.2708	7.09876e-110
DOCK8	2.07859	0.162014	12.8297	1.11801e-37
ELAVL2	-2.95937	0.380296	-7.78176	7.15231e-15
NCS1	-1.71357	0.124787	-13.7319	6.53629e-43
CA9	-5.60203	0.295222	-18.9756	2.71173e-80
TYRP1	1.39761	0.23606	5.92059	3.20794e-09
MPDZ	1.41761	0.134549	10.536	5.89601e-26
LHX3	-4.2504	0.551238	-7.71064	1.25189e-14
PIP5K1B	2.66424	0.199878	13.3293	1.56267e-40
NPDC1	1.12298	0.141889	7.91449	2.48262e-15
SH3GL2	2.49805	0.360635	6.9268	4.30455e-12
PTGDS	2.61243	0.220886	11.8271	2.82887e-32
EXOSC3	-1.1119	0.100064	-11.1119	1.09771e-28
DNTT	-2.03344	0.457683	-4.4429	8.87544e-06
ATRNL1	-3.13191	0.310749	-10.0786	6.87073e-24
RAB11FIP2	1.25219	0.0757045	16.5405	1.87344e-61
CXCL12	1.80056	0.187143	9.62132	6.49901e-22
PKD2L1	1.32229	0.226666	5.83365	5.42278e-09
CUBN	1.43645	0.150318	9.55607	1.22315e-21
PALD1	1.90418	0.143961	13.2271	6.11965e-40
VSIR	1.70365	0.128291	13.2796	3.04029e-40
SPOCK2	3.30236	0.222478	14.8436	7.65823e-50
LIPA	1.22053	0.126605	9.64042	5.39646e-22
TLX1	-7.98747	0.528989	-15.0995	1.63142e-51
TWNK	-1.42472	0.0916969	-15.5373	1.94121e-54
SFXN3	1.11984	0.117541	9.52718	1.61606e-21
FGF8	-2.02074	0.318772	-6.33913	2.31063e-10
NPM3	-2.32927	0.121036	-19.2444	1.57352e-82
PITX3	-2.25741	0.271078	-8.32753	8.25463e-17
CPEB3	1.25999	0.0945453	13.3268	1.61681e-40
NEURL1	-2.51154	0.276343	-9.08848	1.00436e-19
MAP3K8	1.60681	0.129971	12.3628	4.15338e-35
DKK1	-1.78427	0.263826	-6.76305	1.35121e-11
GLRX3	-1.33167	0.102309	-13.0161	9.90424e-39
UBE2S	-2.93507	0.119628	-24.5349	6.26232e-133
DNAJC12	-1.02395	0.227767	-4.49562	6.93679e-06
PPIF	-1.81849	0.110644	-16.4354	1.06712e-60
CYP2C18	-1.94723	0.27097	-7.18616	6.66385e-13
KRT23	-3.85352	0.343752	-11.2102	3.63481e-29
RUNDC3A	-2.67686	0.25034	-10.6929	1.09873e-26
CSF3	4.47804	0.339395	13.1942	9.47964e-40
RAPGEFL1	-3.74779	0.195858	-19.1353	1.28431e-81
RGS9	1.5285	0.180818	8.45325	2.83315e-17
RNF43	-1.24979	0.116851	-10.6956	1.06778e-26
WNT3	-1.50155	0.156809	-9.57568	1.0119e-21
ASPA	3.87704	0.19423	19.961	1.20181e-88
43347	2.12035	0.134375	15.7794	4.31308e-56
P2RX1	1.64028	0.190127	8.62728	6.28289e-18
KRT37	-5.32433	0.456181	-11.6715	1.78217e-31
TRIM16L	-3.42053	0.242899	-14.0821	4.89335e-45
CBX1	-1.24727	0.0907333	-13.7466	5.33721e-43
C1QBP	-1.13275	0.108258	-10.4634	1.27215e-25
SLC6A4	5.99522	0.321991	18.6192	2.24462e-77
BLMH	-1.00211	0.129252	-7.75314	8.96473e-15
ALDH3A1	-3.96946	0.354196	-11.207	3.76869e-29
ICAM2	2.50747	0.155768	16.0975	2.6577e-58
PSMD11	-1.27744	0.0902434	-14.1555	1.72657e-45
CCL7	-1.14994	0.258736	-4.44444	8.81196e-06
CCL2	2.55949	0.203958	12.5491	4.02276e-36
KRT32	-4.5375	0.328858	-13.7978	2.62901e-43
KAT2A	-1.62565	0.0994562	-16.3454	4.69247e-60
HSD17B1	-1.67986	0.148667	-11.2995	1.32036e-29
ABI3	1.24124	0.143277	8.66326	4.58472e-18
DLX4	-1.62567	0.195737	-8.30535	9.95225e-17
COL1A1	-1.64032	0.223545	-7.33773	2.17243e-13
SGCA	3.14856	0.221761	14.198	9.42486e-46
VAT1	1.09082	0.0978965	11.1425	7.78592e-29
RND2	-1.97453	0.228487	-8.64179	5.5338e-18
ALOX12	-2.08373	0.234944	-8.86904	7.37761e-19
MPP2	-1.19457	0.179817	-6.64324	3.06859e-11
CACNG1	1.49412	0.334796	4.46277	8.09081e-06
HLF	1.87692	0.213673	8.78409	1.57636e-18
SLC16A6	1.61403	0.152105	10.6113	2.64141e-26
FAM20A	1.23268	0.16778	7.34696	2.02766e-13
MAP2K6	-1.11175	0.158	-7.03635	1.97334e-12
RCVRN	1.3265	0.223336	5.9395	2.85886e-09
MYH1	2.78709	0.333375	8.36021	6.26041e-17
SLC9A3R1	-2.5925	0.156123	-16.6055	6.3611e-62
VTN	2.51332	0.217813	11.5389	8.39879e-31
PMP22	1.7266	0.135946	12.7007	5.86108e-37
FOXN1	-4.59836	0.285542	-16.104	2.39134e-58
UNC119	-1.20362	0.0875579	-13.7466	5.341e-43
ALDOC	-1.68974	0.148146	-11.4059	3.90782e-30
GNRHR	-1.18386	0.23576	-5.02144	5.12866e-07
SULT1E1	-2.19622	0.361916	-6.06832	1.29255e-09
NMU	-4.94932	0.264823	-18.6891	6.06889e-78
PF4V1	-1.61159	0.403056	-3.99844	6.37618e-05
AREG	1.47483	0.269209	5.4784	4.29195e-08
UCP1	-1.3869	0.366007	-3.78928	0.000151085
GAB1	1.21946	0.112998	10.7919	3.75974e-27
IL2	1.72522	0.233737	7.381	1.57106e-13
WFS1	2.22899	0.0990202	22.5104	3.28164e-112
ANXA10	-4.88234	0.405432	-12.0423	2.12926e-33
GALNT7	-1.10748	0.112539	-9.84089	7.50425e-23
SOD3	2.43392	0.177882	13.6828	1.28635e-42
TRIM2	-1.15588	0.1396	-8.27993	1.2325e-16
NEIL3	-4.20588	0.155546	-27.0394	5.08613e-161
NSD2	-1.14149	0.100846	-11.3192	1.05446e-29
SH3D19	1.48026	0.0932674	15.8711	1.00422e-56
NKX3-2	-4.5334	0.276617	-16.3887	2.30179e-60
BST1	1.48316	0.195429	7.58926	3.21737e-14
RAPGEF2	1.85531	0.0924686	20.0642	1.5175e-89
HGFAC	-2.00201	0.271763	-7.36674	1.74845e-13
SNX25	2.25889	0.0941176	24.0007	2.73304e-127
LRP2BP	2.7556	0.127765	21.5678	3.60561e-103
FAM149A	1.63494	0.163803	9.98111	1.84387e-23
NCAPG	-3.63249	0.110848	-32.7699	1.58088e-235
UGDH	-1.48613	0.161792	-9.18541	4.09972e-20
PPARGC1A	1.53286	0.258181	5.93715	2.90015e-09
CCDC34	-2.44073	0.11299	-21.6013	1.74547e-103
ZBTB16	4.28919	0.289264	14.8279	9.66711e-50
CRTAM	1.57738	0.194818	8.09667	5.6483e-16
JHY	1.11832	0.163144	6.85481	7.14089e-12
VWA5A	1.21	0.1366	8.85796	8.14949e-19
SIAE	1.11676	0.119212	9.36787	7.40115e-21
LPXN	1.47349	0.149375	9.8644	5.93876e-23
DTX4	1.37575	0.140436	9.79632	1.16764e-22
EHD1	1.34075	0.113221	11.8419	2.37087e-32
NRXN2	-1.30914	0.256216	-5.10951	3.2299e-07
MS4A4A	1.81152	0.182246	9.93996	2.78948e-23
CCDC86	-1.43165	0.0875861	-16.3456	4.67451e-60
PRPF19	-1.0948	0.0630998	-17.3503	1.96209e-67
CCKBR	-3.49702	0.480961	-7.2709	3.5711e-13
CHORDC1	-1.13482	0.0995315	-11.4016	4.10521e-30
FOLR1	3.98981	0.303014	13.1671	1.35753e-39
FOLR3	2.57178	0.340929	7.54345	4.57687e-14
ARHGEF17	1.4996	0.117811	12.7288	4.08948e-37
APOA5	2.3966	0.34063	7.03577	1.9816e-12
CEP126	1.68584	0.156574	10.767	4.92663e-27
IL10RA	1.29454	0.166264	7.78605	6.91346e-15
GALNT18	1.12783	0.140055	8.05276	8.09467e-16
UPK2	-2.10641	0.278925	-7.55187	4.29037e-14
NECTIN1	-4.46835	0.155314	-28.7699	5.11389e-182
KIAA1549L	-4.65166	0.284384	-16.3569	3.88217e-60
SLC15A3	1.69054	0.150571	11.2275	2.98836e-29
MDK	-2.5098	0.16564	-15.1522	7.32841e-52
NAA40	-1.03381	0.0793009	-13.0366	7.57689e-39
CD81	1.17478	0.0707414	16.6066	6.24024e-62
SLC35F2	-1.32328	0.15108	-8.75881	1.97317e-18
C11orf21	2.1796	0.20166	10.8083	3.14543e-27
ELMOD1	1.27736	0.222036	5.75294	8.77033e-09
EXPH5	1.00424	0.130022	7.72356	1.13127e-14
POU2AF1	-1.22341	0.222729	-5.4928	3.9561e-08
PTPN5	3.22389	0.268919	11.9883	4.09181e-33
VWF	3.31043	0.151192	21.8955	2.86759e-106
P3H3	-1.27832	0.153609	-8.32188	8.65798e-17
PRPF40B	-1.06875	0.0899296	-11.8843	1.42801e-32
CD69	2.25681	0.200508	11.2554	2.17749e-29
SELPLG	2.24885	0.155594	14.4534	2.38747e-47
ASIC1	-2.19769	0.156829	-14.0133	1.29265e-44
DAO	2.58239	0.254134	10.1616	2.94358e-24
BIN2	1.61747	0.162448	9.95688	2.35325e-23
IL23A	-2.33695	0.198783	-11.7563	6.55506e-32
SYT10	-1.74326	0.428848	-4.065	4.80327e-05
BCL7A	-1.02316	0.0931571	-10.9831	4.60698e-28
CYP27B1	-1.97347	0.160097	-12.3268	6.49964e-35
MYF6	-1.90913	0.400153	-4.771	1.83317e-06
LIN7A	1.7638	0.235285	7.49641	6.55891e-14
ACSS3	2.32565	0.197737	11.7613	6.17655e-32
TNS2	2.5612	0.110613	23.1546	1.3064e-118
GLI1	-1.12048	0.253692	-4.4167	1.00218e-05
LTA4H	1.72729	0.0820928	21.0407	2.77952e-98
SLC6A12	1.72481	0.180789	9.54046	1.42201e-21
WNT5B	-1.60692	0.189819	-8.46554	2.54977e-17
MAGOHB	-1.23657	0.0957539	-12.9141	3.74929e-38
TRPV4	-2.05986	0.154641	-13.3202	1.76519e-40
FOXM1	-4.42492	0.134113	-32.994	9.8963e-239
PRR4	-1.36314	0.199368	-6.83731	8.06916e-12
PRMT8	1.54967	0.340458	4.55173	5.32064e-06
RAD51AP1	-3.24322	0.122117	-26.5584	2.05356e-155
SH2B3	1.50416	0.123923	12.1379	6.65353e-34
KCNA1	-1.00005	0.423567	-2.36103	0.0182244
CREBL2	1.00032	0.0752835	13.2873	2.74231e-40
ALDH2	2.15415	0.134107	16.0629	4.64105e-58
ART4	3.85018	0.244414	15.7527	6.57854e-56
MGP	2.42762	0.189727	12.7953	1.74126e-37
RASAL1	-4.1228	0.191018	-21.5833	2.57745e-103
ARHGDIB	1.43404	0.133153	10.7699	4.77748e-27
SLC38A1	-1.2737	0.106279	-11.9844	4.287e-33
RERGL	1.92934	0.357849	5.39149	6.98765e-08
C12orf49	1.50372	0.0786355	19.1227	1.63358e-81
FZD10	-3.30926	0.263685	-12.5501	3.97221e-36
RFC5	-1.74271	0.087811	-19.8462	1.18929e-87
STX2	1.32153	0.110667	11.9415	7.18892e-33
ADGRD1	3.96643	0.206534	19.2047	3.38108e-82
NUP107	-1.11486	0.084957	-13.1227	2.44213e-39
TIMELESS	-2.31397	0.0916266	-25.2544	1.01429e-140
MRPL51	-1.10795	0.0902823	-12.2721	1.27968e-34
GAPDH	-2.50666	0.114281	-21.9342	1.22467e-106
NOP2	-1.58521	0.100167	-15.8256	2.07076e-56
GNB3	-1.69342	0.165651	-10.2228	1.56688e-24
CDCA3	-4.15899	0.12248	-33.9566	9.73609e-253
USP5	-1.04839	0.0751957	-13.9422	3.50937e-44
TPI1	-1.72643	0.0975751	-17.6933	4.7233e-70
ENO2	-1.289	0.150788	-8.54842	1.24785e-17
NT5DC3	-1.08245	0.118049	-9.16948	4.75286e-20
SLCO1B3	-6.24307	0.449425	-13.8912	7.15937e-44
CMAS	-1.38839	0.11106	-12.5013	7.34763e-36
CLEC4A	1.13304	0.168274	6.73328	1.65881e-11
KLRB1	1.53803	0.188787	8.14689	3.73417e-16
BTN3A3	1.40033	0.130425	10.7367	6.84539e-27
RSPH4A	2.75041	0.253071	10.8682	1.63473e-27
MAK	1.99641	0.161743	12.3431	5.30534e-35
PAK1IP1	-1.17385	0.0858905	-13.6668	1.60224e-42
NEDD9	2.21521	0.147058	15.0635	2.81302e-51
ADTRP	1.10582	0.245513	4.50414	6.66434e-06
FAM184A	2.63077	0.197618	13.3124	1.96036e-40
MAN1A1	1.36343	0.154169	8.84372	9.25862e-19
SERINC1	1.40703	0.0691701	20.3415	5.51646e-92
TPD52L1	-2.46579	0.164218	-15.0153	5.82683e-51
NCOA7	1.498	0.150357	9.96295	2.2139e-23
RIPOR2	1.92202	0.184442	10.4207	1.99495e-25
SASH1	2.14751	0.115307	18.6243	2.0426e-77
ULBP1	-1.06203	0.217328	-4.88675	1.02514e-06
FBXO5	-1.43673	0.0952413	-15.0851	2.02814e-51
FANCE	-2.03917	0.114324	-17.8368	3.66085e-71
TULP1	-3.04164	0.222164	-13.691	1.14935e-42
SLC26A8	1.3661	0.170127	8.02987	9.75764e-16
MCM3	-1.3307	0.0978072	-13.6053	3.7241e-42
PHACTR1	2.92691	0.150583	19.4373	3.73577e-84
CD83	2.18272	0.138709	15.736	8.56742e-56
BMP5	2.5856	0.296442	8.72211	2.73072e-18
TREML2	1.03673	0.23758	4.36371	1.27878e-05
FHL5	4.15333	0.192821	21.5398	6.59252e-103
KHDRBS2	4.06248	0.281941	14.409	4.54445e-47
PRDM13	-7.58033	0.434824	-17.4331	4.62681e-68
E2F3	-1.29699	0.115978	-11.1831	4.93502e-29
COL9A1	-2.58006	0.36064	-7.15411	8.42192e-13
WASF1	-2.69634	0.170001	-15.8607	1.18483e-56
VNN2	1.38362	0.239426	5.77892	7.51807e-09
GMNN	-2.12273	0.106508	-19.9302	2.22607e-88
SOBP	1.1882	0.195605	6.07448	1.24387e-09
NR2E1	-6.23707	0.475757	-13.1098	2.89393e-39
FIG4	1.13533	0.0792163	14.3321	1.37956e-46
PERP	-3.4599	0.137489	-25.1649	9.70878e-140
ARFGEF3	1.71536	0.148177	11.5764	5.42913e-31
SLC16A10	1.0001	0.160394	6.23523	4.51109e-10
ADGRG6	1.46759	0.195177	7.51925	5.50899e-14
PHACTR2	1.93951	0.100694	19.2615	1.13031e-82
CCR6	1.27538	0.234969	5.42785	5.70381e-08
UNC93A	-6.06079	0.493709	-12.276	1.21809e-34
SLC22A2	-2.35929	0.448649	-5.25865	1.4512e-07
PACRG	1.84195	0.258841	7.11614	1.10994e-12
QKI	1.26424	0.0813659	15.5377	1.92645e-54
C6orf118	3.09957	0.411296	7.5361	4.84222e-14
MDFI	-2.07345	0.163653	-12.6698	8.69158e-37
CCND3	1.45828	0.117171	12.4457	1.47536e-35
BYSL	-1.36311	0.0885795	-15.3885	1.95471e-53
DNPH1	-1.02894	0.106404	-9.67009	4.04033e-22
TTK	-4.52032	0.122619	-36.8649	1.68848e-297
WISP3	-2.81395	0.307651	-9.14659	5.87606e-20
LAMA4	1.65565	0.146255	11.3203	1.04165e-29
CLIC5	5.31373	0.235736	22.541	1.64575e-112
ENPP5	1.05872	0.182105	5.81381	6.10673e-09
LY86	2.21826	0.174989	12.6766	7.97602e-37
TBX18	-3.63454	0.286566	-12.6831	7.33829e-37
CEP72	-1.71941	0.114303	-15.0426	3.86125e-51
SEMA5A	1.86274	0.253352	7.3524	1.94682e-13
C7	3.41134	0.279473	12.2063	2.8755e-34
NME5	2.55341	0.254534	10.0317	1.10585e-23
KIF20A	-3.56987	0.117388	-30.4109	3.94713e-203
MRPS30	-1.01139	0.0886926	-11.4033	4.02473e-30
HBEGF	1.74154	0.184764	9.42576	4.2702e-21
SLC4A9	-1.35228	0.226531	-5.96953	2.37939e-09
COL4A3BP	1.11547	0.0667835	16.7028	1.24989e-62
PDE8B	1.68149	0.124407	13.5161	1.25743e-41
HAVCR1	-1.04246	0.321919	-3.23826	0.0012026
ITK	1.18499	0.200992	5.89571	3.7307e-09
BTNL8	3.08622	0.195034	15.824	2.12586e-56
GABRG2	-7.37657	0.546233	-13.5044	1.47223e-41
POLR3G	-1.30715	0.135205	-9.66787	4.12882e-22
DROSHA	-1.15667	0.0953777	-12.1272	7.57728e-34
LMNB1	-2.0346	0.101553	-20.0348	2.73806e-89
ARRDC3	1.25647	0.124984	10.053	8.91117e-24
TARS	-1.54896	0.0919839	-16.8395	1.25339e-63
IRX4	-9.19968	0.439617	-20.9266	3.06605e-97
PDE4D	1.5375	0.123795	12.4197	2.04318e-35
BRIX1	-1.78164	0.0989146	-18.0119	1.57063e-72
PRLR	-1.63683	0.306762	-5.33583	9.5108e-08
IL5	1.4362	0.261589	5.49031	4.01229e-08
PCDH12	2.87762	0.130002	22.1352	1.44928e-108
NUP155	-1.77628	0.0937466	-18.9477	4.61394e-80
NR3C1	1.07915	0.084654	12.7478	3.20537e-37
LIFR	2.29975	0.205327	11.2004	4.05688e-29
C9	-2.30715	0.309447	-7.45572	8.93812e-14
WWC1	1.66291	0.11338	14.6668	1.0526e-48
CDX1	-2.73276	0.251797	-10.853	1.92962e-27
STC2	-1.59429	0.19444	-8.19938	2.41633e-16
CPEB4	1.33025	0.0984355	13.5139	1.29492e-41
EHHADH	-1.08511	0.109941	-9.86988	5.62298e-23
SMC4	-1.60304	0.106638	-15.0326	4.4899e-51
TBCCD1	-1.31052	0.100245	-13.0732	4.68353e-39
HRG	-4.34701	0.383317	-11.3405	8.26519e-30
CLDN16	-1.9981	0.260912	-7.65812	1.88678e-14
CD86	1.1627	0.147857	7.86369	3.72987e-15
AMOTL2	1.22044	0.127757	9.5528	1.26234e-21
NIT2	-1.2003	0.097537	-12.3061	8.40314e-35
FAM162A	-1.91864	0.124342	-15.4303	1.02425e-53
PCCB	-1.12495	0.105457	-10.6673	1.44768e-26
RBP2	3.79502	0.247047	15.3615	2.96552e-53
RBP1	-2.40591	0.227252	-10.587	3.42484e-26
GRK7	-3.23695	0.237698	-13.6179	3.13343e-42
RNF7	-1.13448	0.0987336	-11.4903	1.47624e-30
KAT2B	1.74116	0.102015	17.0677	2.58272e-65
SERPINI2	1.47889	0.304869	4.85091	1.22895e-06
PDCD10	-1.37148	0.110141	-12.452	1.36327e-35
LRRC31	1.95022	0.394173	4.94762	7.5127e-07
WNT5A	-2.19156	0.21212	-10.3317	5.06595e-25
PFKFB4	-1.28818	0.142224	-9.05743	1.33555e-19
COL7A1	-5.79351	0.216278	-26.7873	4.54515e-158
FGF12	-2.05515	0.241434	-8.5123	1.70518e-17
HES1	-1.03093	0.120555	-8.55153	1.21469e-17
ACAP2	-1.03974	0.114078	-9.11433	7.91584e-20
ECT2	-3.17648	0.121806	-26.0783	6.43355e-150
GNAT1	-1.67241	0.340202	-4.91593	8.83612e-07
GNAI2	1.19851	0.0740365	16.1881	6.12219e-59
TFG	-1.20672	0.0816935	-14.7713	2.24307e-49
HYAL1	2.95897	0.167686	17.6459	1.09468e-69
FXR1	-1.58104	0.109366	-14.4565	2.28243e-47
IFT57	1.72709	0.0994383	17.3684	1.43119e-67
HHLA2	1.99166	0.285221	6.98287	2.892e-12
UMPS	-1.3218	0.0857221	-15.4196	1.20906e-53
NCBP2	-1.36096	0.0873784	-15.5754	1.06915e-54
FRMD4B	1.13548	0.101512	11.1857	4.79296e-29
PODXL2	-3.0017	0.188217	-15.9481	2.93615e-57
UPK1B	-5.69217	0.414595	-13.7295	6.76055e-43
EFCC1	3.74592	0.175124	21.3901	1.65141e-101
MRPL3	-1.66218	0.0862355	-19.2749	8.73487e-83
PLSCR4	1.82329	0.128085	14.235	5.55509e-46
CISH	1.87513	0.124495	15.062	2.88046e-51
ABCC5	-3.53913	0.189512	-18.675	7.91492e-78
ARHGEF26	1.67343	0.188692	8.86854	7.41089e-19
PLCH1	1.5323	0.18302	8.37232	5.64934e-17
VIPR1	3.56381	0.174288	20.4478	6.28169e-93
DNAH1	1.28157	0.144173	8.88909	6.16118e-19
ZBTB47	1.4883	0.0949757	15.6703	2.41306e-55
TNNC1	5.07329	0.257147	19.7291	1.21222e-86
CLCN2	-2.4753	0.141456	-17.4987	1.4665e-68
FOXP1	1.40378	0.105845	13.2626	3.81499e-40
EIF4G1	-1.24805	0.0971914	-12.8412	9.6402e-38
SLC4A3	-2.51197	0.169696	-14.8028	1.40548e-49
ADAM23	-4.64271	0.295673	-15.7022	1.46161e-55
RTKN	-1.30549	0.098844	-13.2076	7.93383e-40
IL1A	-1.82536	0.308424	-5.91834	3.252e-09
EPB41L5	1.85234	0.095774	19.3408	2.43776e-83
POMC	-2.75083	0.285846	-9.62346	6.36538e-22
CENPA	-4.63625	0.12232	-37.9026	0.000254
CYTIP	1.1474	0.177197	6.47529	9.46314e-11
SLC30A3	-2.74708	0.297016	-9.24892	2.26775e-20
PSMD14	-1.22365	0.0845477	-14.4729	1.79786e-47
PPM1G	-1.02837	0.0674369	-15.2493	1.66353e-52
REEP6	-1.32602	0.194609	-6.81373	9.51025e-12
GCA	1.06399	0.105889	10.0482	9.3551e-24
TLX2	-4.85363	0.322368	-15.0562	3.1438e-51
SPTBN1	2.17531	0.0855479	25.428	1.23713e-142
GALNT3	-1.00781	0.118269	-8.52135	1.57705e-17
ACADL	3.43223	0.228797	15.0012	7.20932e-51
EVA1A	1.56029	0.214094	7.28789	3.14845e-13
WDR75	-1.27449	0.0715646	-17.809	6.02047e-71
EFEMP1	1.86361	0.193869	9.61268	7.06841e-22
REG1A	-4.14455	0.45271	-9.15499	5.43648e-20
DNAH6	2.23538	0.258538	8.64624	5.32262e-18
PECR	1.06318	0.114295	9.30204	1.37773e-20
IGFBP2	-3.38012	0.222904	-15.164	6.12352e-52
IGFBP5	-1.34154	0.203229	-6.60113	4.08032e-11
CCT4	-1.44911	0.104116	-13.9183	4.90753e-44
OTX1	-4.75512	0.199383	-23.8492	1.03166e-125
GNLY	1.08587	0.20643	5.26026	1.43851e-07
ST3GAL5	1.97912	0.1578	12.5419	4.40268e-36
HSPE1	-1.65559	0.103425	-16.0076	1.13012e-57
IL1R2	-1.34988	0.271886	-4.96486	6.87497e-07
PRKAG3	-1.17126	0.351357	-3.33354	0.000857496
IL1R1	1.45075	0.13125	11.0533	2.11214e-28
WNT6	-3.46627	0.325874	-10.6368	2.00852e-26
IL1RL2	-1.91998	0.17447	-11.0047	3.62844e-28
IL1RL1	3.80646	0.312831	12.1678	4.61296e-34
IL18R1	1.51773	0.155785	9.74243	1.9875e-22
IL18RAP	1.58786	0.187033	8.48973	2.07113e-17
SLC9A2	-4.13724	0.267642	-15.4582	6.64719e-54
FHL2	-1.77614	0.18596	-9.5512	1.282e-21
MLPH	2.78904	0.234423	11.8975	1.22e-32
ABCB6	-2.52633	0.160678	-15.7229	1.05339e-55
SLC5A7	-1.62262	0.482171	-3.36524	0.000764773
TPO	-1.9071	0.29945	-6.36869	1.90644e-10
PROC	-2.48173	0.222177	-11.1701	5.71353e-29
ID2	1.35091	0.136329	9.90919	3.797e-23
HPCAL1	1.77289	0.0985179	17.9956	2.10917e-72
ODC1	-1.26967	0.200566	-6.33046	2.44431e-10
NOL10	-1.09809	0.0681331	-16.1168	1.94321e-58
RMDN2	1.53098	0.114116	13.416	4.8731e-41
DLX2	-6.47035	0.378055	-17.1148	1.15022e-65
LCT	-1.81395	0.318912	-5.68793	1.28586e-08
SDC1	-1.7187	0.134654	-12.7638	2.61028e-37
PLCL1	1.88085	0.173416	10.8459	2.08591e-27
SLC1A4	-2.24651	0.158032	-14.2155	7.33806e-46
KYNU	-1.21771	0.235577	-5.16905	2.35293e-07
PNO1	-1.15846	0.0957501	-12.0988	1.07215e-33
PLEK	1.15587	0.180778	6.39391	1.61699e-10
TRAK2	1.40604	0.0859886	16.3515	4.24392e-60
PCYOX1	1.08746	0.0870543	12.4918	8.28014e-36
KISS1R	-3.7493	0.275142	-13.6268	2.77545e-42
EPAS1	3.33831	0.147239	22.6727	8.33083e-114
VAX2	-2.01694	0.20551	-9.81434	9.76781e-23
ATP6V1B1	-1.05986	0.236613	-4.4793	7.48896e-06
MSH6	-1.42744	0.0936255	-15.2462	1.74387e-52
PARD3B	1.97113	0.177162	11.1261	9.36176e-29
FARSB	-1.16294	0.0767619	-15.15	7.57824e-52
DHCR24	1.17858	0.116262	10.1372	3.77678e-24
MARK1	-2.68852	0.137858	-19.5021	1.0539e-84
TNR	3.70752	0.32989	11.2386	2.63396e-29
GPX7	-1.10314	0.159511	-6.91574	4.65415e-12
CACYBP	-1.22535	0.0946288	-12.9491	2.37836e-38
TPSG1	1.64578	0.205168	8.02162	1.04359e-15
RALGPS2	-1.21386	0.114134	-10.6354	2.03977e-26
ANGPTL1	3.56202	0.204727	17.3989	8.41349e-68
MRPL37	-1.05083	0.0744427	-14.116	3.02797e-45
QSOX1	1.06725	0.0995768	10.7178	8.39559e-27
WDR77	-1.01078	0.0824756	-12.2555	1.57004e-34
RAP1A	1.07364	0.0764456	14.0445	8.32867e-45
HDAC1	-1.18594	0.0770112	-15.3996	1.64811e-53
RHOU	1.56395	0.171388	9.12522	7.15913e-20
ARHGEF2	1.20583	0.0939428	12.8357	1.03397e-37
MAD2L2	-1.17168	0.105979	-11.0558	2.05489e-28
LEPR	2.7567	0.161218	17.0992	1.50485e-65
PRG4	5.46565	0.2803	19.4993	1.11356e-84
NCF2	1.98358	0.145585	13.625	2.84577e-42
RGS2	1.49518	0.160266	9.32931	1.06561e-20
RPE65	-3.2773	0.405544	-8.08126	6.41011e-16
AMPD1	1.00701	0.248255	4.05633	4.98496e-05
AGMAT	-2.32537	0.166214	-13.9902	1.78927e-44
OLFML3	1.29875	0.164175	7.91076	2.55826e-15
CFHR3	-1.99269	0.207387	-9.60857	7.3562e-22
TTF2	-1.4544	0.0961639	-15.1242	1.12107e-51
NR5A2	2.39831	0.145152	16.5228	2.5155e-61
OSCP1	1.4565	0.121616	11.9763	4.73175e-33
HPCAL4	1.43602	0.247689	5.79766	6.72457e-09
MYCL	-2.48138	0.214606	-11.5625	6.3811e-31
KMO	2.13727	0.174799	12.227	2.23097e-34
ST6GALNAC5	2.40675	0.15817	15.2163	2.75874e-52
ADGRL2	1.73641	0.158004	10.9896	4.28702e-28
MFAP2	-1.98522	0.165595	-11.9884	4.0853e-33
KDM5B	-1.1938	0.0854507	-13.9707	2.35385e-44
ACTL8	-7.55283	0.496879	-15.2005	3.50728e-52
SSX2IP	-1.44907	0.096391	-15.0333	4.44431e-51
GBP3	1.1604	0.158128	7.33838	2.16196e-13
KIF17	2.21443	0.151697	14.5977	2.90431e-48
CD160	1.70542	0.154713	11.0231	2.9559e-28
SLC2A1	-5.6894	0.167226	-34.0222	1.04476e-253
CDC20	-4.51391	0.121938	-37.0182	5.83797e-300
MPL	1.00175	0.126665	7.90864	2.60209e-15
ARTN	-5.30298	0.214438	-24.7297	5.1305e-135
B4GALT2	-1.37103	0.0820948	-16.7006	1.29683e-62
PRDX1	-1.20744	0.137305	-8.7938	1.44584e-18
CCDC181	1.94082	0.210329	9.22756	2.76867e-20
SLC19A2	1.02219	0.107534	9.50565	1.98797e-21
MROH9	3.14411	0.293536	10.7112	9.02291e-27
TNFSF4	-1.01105	0.168608	-5.99644	2.01686e-09
DARS2	-1.39614	0.0982021	-14.217	7.18257e-46
HSD11B1	1.36566	0.1968	6.93933	3.93957e-12
IRF6	-2.74049	0.134491	-20.3767	2.68942e-92
UTP25	-1.02342	0.0742727	-13.7792	3.40111e-43
PLPPR4	1.59714	0.172992	9.23243	2.64551e-20
STMN1	-1.82971	0.123074	-14.8667	5.42093e-50
MAN1C1	1.25892	0.153178	8.21868	2.05757e-16
NEK2	-4.54395	0.12262	-37.057	1.38497e-300
CENPF	-4.1027	0.128777	-31.859	9.89466e-223
STX12	1.36547	0.071719	19.0392	8.07858e-81
43161	2.03645	0.107349	18.9704	2.9968e-80
SLC5A9	3.81138	0.240836	15.8256	2.07131e-56
CD3EAP	-1.67754	0.100015	-16.7728	3.85627e-63
RCN2	-1.25163	0.0994995	-12.5793	2.74408e-36
CHRNB4	-4.81239	0.235808	-20.4081	1.41629e-92
CTSD	1.18432	0.112482	10.529	6.35296e-26
A4GNT	1.00801	0.273978	3.67918	0.000233988
TREH	1.66008	0.22743	7.2993	2.8926e-13
MMP8	-1.77548	0.293097	-6.05763	1.38138e-09
APOA1	1.77805	0.284678	6.24581	4.21615e-10
SLC8A2	-2.67713	0.305829	-8.75367	2.06519e-18
KIF14	-4.33227	0.129294	-33.5072	3.78414e-246
B4GALT6	-1.12784	0.152165	-7.41195	1.24459e-13
CASC1	2.28635	0.22848	10.0068	1.42288e-23
ATP10B	-3.59439	0.254947	-14.0986	3.87527e-45
ELOVL4	-3.43036	0.214004	-16.0294	7.96046e-58
FILIP1	2.86234	0.187391	15.2747	1.12724e-52
CNR1	1.68069	0.28144	5.97177	2.34695e-09
SGIP1	1.15497	0.155323	7.43588	1.03875e-13
ADGB	3.31725	0.415524	7.98329	1.42486e-15
MYB	-1.45421	0.260906	-5.57371	2.49372e-08
CTGF	1.79305	0.177	10.1303	4.05541e-24
TCF21	4.59306	0.211844	21.6813	3.08036e-104
TGIF2	-1.01881	0.108168	-9.41885	4.56035e-21
CASQ2	3.25078	0.264124	12.3078	8.22662e-35
ABCG2	1.7702	0.207264	8.54082	1.33272e-17
SPP1	-4.38052	0.26054	-16.8133	1.95131e-63
UCHL3	-1.25223	0.104713	-11.9587	5.84868e-33
PCDH17	2.07996	0.152258	13.6608	1.73992e-42
DNAH7	2.70192	0.223916	12.0667	1.58409e-33
SATB2	-1.22704	0.167659	-7.31864	2.50495e-13
GDA	-5.0222	0.305338	-16.448	8.67083e-61
KLF9	2.22892	0.137614	16.1969	5.30319e-59
C2orf40	3.30251	0.316231	10.4433	1.5718e-25
CPSF3	-1.08415	0.0701634	-15.4518	7.34073e-54
SENP5	-1.21054	0.0858087	-14.1075	3.41629e-45
CCDC92	1.05814	0.091915	11.5122	1.14569e-30
C1orf198	1.72405	0.0733909	23.4913	5.01078e-122
TRIM67	-1.60997	0.210009	-7.66618	1.77198e-14
HEATR1	-1.23508	0.0808882	-15.269	1.23055e-52
CTNNAL1	1.22246	0.14819	8.24927	1.5936e-16
HDHD3	-1.0122	0.0954457	-10.605	2.82456e-26
SLC46A2	4.27879	0.252346	16.956	1.73711e-64
HSDL2	1.10221	0.0908344	12.1342	6.95455e-34
NR4A3	3.18369	0.234466	13.5784	5.37579e-42
GALNT12	1.09597	0.137048	7.99695	1.27538e-15
CSF3R	2.45433	0.20127	12.1942	3.33692e-34
ONECUT2	-4.12413	0.248351	-16.606	6.30124e-62
VSX2	1.10555	0.34286	3.2245	0.00126191
PGF	-2.11626	0.182448	-11.5992	4.1572e-31
BBOF1	1.14262	0.129009	8.85692	8.22533e-19
NPC2	1.66169	0.118952	13.9694	2.39637e-44
DNAL1	1.06463	0.0789529	13.4843	1.93393e-41
LTBP2	1.74557	0.15399	11.3356	8.7429e-30
FLVCR2	2.31066	0.145746	15.854	1.3192e-56
ZC2HC1C	1.43477	0.133692	10.7319	7.20955e-27
ESRRB	-1.34031	0.317185	-4.22564	2.38265e-05
DNMT3A	-1.08481	0.0927464	-11.6965	1.32752e-31
CNRIP1	2.01101	0.136435	14.7396	3.58821e-49
BCL11A	-3.16584	0.182753	-17.3231	3.14888e-67
CRIPT	-1.04307	0.102179	-10.2082	1.82122e-24
IFIT3	1.15872	0.186596	6.20976	5.3067e-10
NKX2-3	-3.38277	0.326291	-10.3673	3.49112e-25
IFIT2	1.24378	0.178007	6.98729	2.80247e-12
PPP1R3C	1.14782	0.214713	5.34581	9.00124e-08
CNNM1	-3.08374	0.245255	-12.5736	2.9499e-36
HELLS	-3.10182	0.110561	-28.0554	3.43482e-173
CFAP58	2.33767	0.210876	11.0855	1.47485e-28
C10orf95	2.11508	0.157235	13.4517	3.0085e-41
SFRP5	2.27797	0.356006	6.39868	1.5673e-10
HOXB8	-2.73103	0.294963	-9.25891	2.06524e-20
CRHR1	-3.35751	0.391422	-8.57771	9.67795e-18
HOXB3	-1.07189	0.165097	-6.4925	8.44247e-11
HOXB1	-2.93082	0.382461	-7.66306	1.8155e-14
DUSP1	2.68208	0.172376	15.5595	1.37182e-54
MSX2	-1.97181	0.245204	-8.04149	8.87529e-16
TEK	4.04737	0.161421	25.0734	9.69836e-139
GRIA2	-3.31148	0.395894	-8.36457	6.0335e-17
CCDC170	2.77702	0.237482	11.6936	1.37458e-31
MYCT1	3.18082	0.136689	23.2705	8.8169e-120
CXorf21	1.50913	0.17093	8.8289	1.05708e-18
CYSTM1	1.57437	0.0902381	17.4469	3.63437e-68
ARAP3	1.40499	0.118397	11.8667	1.76304e-32
CENPL	-2.02332	0.0973245	-20.7894	5.39432e-96
TNFSF18	-1.84466	0.287291	-6.42087	1.35499e-10
TCP1	-1.01923	0.0794487	-12.8288	1.13153e-37
KCNJ5	2.0302	0.209789	9.67735	3.76327e-22
TP53AIP1	-4.36918	0.32239	-13.5525	7.66018e-42
TEX11	-3.05861	0.270368	-11.3128	1.13427e-29
MASTL	-1.32834	0.0941831	-14.1038	3.59658e-45
PLXDC2	1.19934	0.142055	8.44284	3.09726e-17
IQSEC3	2.95128	0.215794	13.6763	1.40605e-42
CCDC77	-1.0729	0.0960801	-11.1667	5.93139e-29
TNFSF11	-2.63972	0.225084	-11.7278	9.18626e-32
SOHLH2	-3.76848	0.346673	-10.8704	1.59487e-27
SMAD9	2.0431	0.171651	11.9027	1.14623e-32
EGR1	2.0557	0.178163	11.5383	8.4566e-31
TMPO	-1.14615	0.0908682	-12.6133	1.78373e-36
SOCS2	1.61681	0.185295	8.72558	2.6482e-18
CLU	1.20634	0.182641	6.60497	3.9761e-11
SORBS3	1.04093	0.0870877	11.9526	6.28974e-33
CHRNA2	3.08688	0.342181	9.0212	1.86038e-19
ADRA1A	3.75064	0.398646	9.40844	5.03559e-21
PDLIM2	2.2216	0.110167	20.1657	1.95826e-90
LYPLA1	-1.08893	0.127706	-8.52683	1.50418e-17
CRISPLD1	-1.52685	0.202787	-7.52935	5.09951e-14
RDH10	-1.21026	0.185523	-6.52351	6.86821e-11
TBX2	2.0891	0.155525	13.4326	3.8968e-41
TBX4	3.19039	0.200792	15.8891	7.54569e-57
TEX14	1.37718	0.14704	9.36605	7.53012e-21
NCAPH	-4.03746	0.111233	-36.2974	1.77917e-288
LRAT	-1.97757	0.279283	-7.0809	1.43218e-12
MND1	-3.53841	0.124111	-28.5101	8.77857e-179
ABCC11	-1.78792	0.168636	-10.6022	2.9092e-26
PRB2	-2.8011	0.46494	-6.02465	1.69472e-09
IAPP	-4.05911	0.440041	-9.22439	2.85192e-20
KCNJ8	1.87759	0.146252	12.8381	1.00316e-37
PDZRN3	1.18454	0.179137	6.61245	3.78006e-11
RGSL1	-3.56587	0.438953	-8.12358	4.5263e-16
CSTA	-3.45142	0.234221	-14.7357	3.80095e-49
B4GALT4	-2.13	0.148888	-14.306	2.00654e-46
NAA50	-1.33424	0.0860465	-15.5061	3.15595e-54
CD80	1.03631	0.175596	5.90168	3.59819e-09
KIF18A	-2.30194	0.110044	-20.9183	3.64941e-97
CRY2	1.82109	0.0858917	21.2022	9.11233e-100
DEPDC7	-2.67355	0.173249	-15.4318	9.99898e-54
CAT	2.12012	0.10672	19.8661	7.99913e-88
PILRB	-1.67087	0.191207	-8.73854	2.36139e-18
GJB6	-8.57151	0.304869	-28.1154	6.34687e-174
GJA3	-5.23062	0.272042	-19.2272	2.19074e-82
ADGRB2	-1.86195	0.185297	-10.0485	9.32939e-24
FABP3	2.42546	0.157192	15.4299	1.02997e-53
CCRL2	2.46282	0.161913	15.2108	2.99979e-52
CCR2	1.46608	0.203613	7.20031	6.00774e-13
ZNF639	-1.33888	0.112108	-11.9427	7.0845e-33
TMEM156	-1.3663	0.24945	-5.47723	4.32031e-08
TMEM54	-1.06968	0.102289	-10.4575	1.35387e-25
CSMD2	-1.32631	0.195704	-6.77712	1.22591e-11
HPCA	-2.59853	0.202361	-12.8411	9.65476e-38
GPSM2	-1.35871	0.0994033	-13.6686	1.56351e-42
FLT3	1.16692	0.207405	5.62627	1.84146e-08
UBL3	1.78921	0.094467	18.9401	5.32967e-80
XPNPEP2	1.53658	0.222062	6.9196	4.52917e-12
SASH3	1.49132	0.168977	8.82557	1.08908e-18
PAEP	-2.41637	0.33086	-7.30331	2.80776e-13
OBP2A	-1.42134	0.321631	-4.41915	9.90896e-06
CD244	1.69451	0.186351	9.09316	9.62035e-20
HS3ST2	1.55943	0.235971	6.60856	3.88077e-11
LDB3	2.44011	0.154506	15.793	3.47568e-56
FAM213A	-1.29119	0.107163	-12.0488	1.96729e-33
PTGFR	1.84197	0.232683	7.91624	2.44798e-15
CBX3	-1.1001	0.0776942	-14.1593	1.63501e-45
WIPF3	-1.88754	0.211131	-8.94014	3.88679e-19
NXPH1	-4.59127	0.463296	-9.91002	3.76559e-23
NPY	-3.2649	0.603213	-5.41251	6.21468e-08
RAMP3	3.57904	0.152216	23.513	3.00614e-122
TWIST1	-3.41316	0.227954	-14.9731	1.10138e-50
GLIPR2	2.50918	0.130357	19.2485	1.45222e-82
RECK	2.0479	0.123838	16.537	1.98687e-61
PHF24	-2.63072	0.303725	-8.6615	4.65579e-18
DNAI1	2.80061	0.340556	8.22362	1.97452e-16
KIAA1549	-1.07382	0.190404	-5.63972	1.70328e-08
AKR1D1	-1.77578	0.295785	-6.00362	1.92968e-09
NUDT10	-2.55784	0.29166	-8.76996	1.78735e-18
SFTPA1	4.65042	0.380044	12.2365	1.98316e-34
PLAU	-2.72142	0.191842	-14.1857	1.12354e-45
SRGN	1.61153	0.191286	8.42469	3.61703e-17
EGR2	1.43123	0.17815	8.03389	9.44295e-16
P4HA1	-1.10715	0.115128	-9.61667	6.79965e-22
ZWINT	-3.17918	0.105795	-30.0504	2.1557e-198
RBM19	-1.13155	0.132332	-8.55081	1.22226e-17
HVCN1	1.19176	0.139268	8.55731	1.15534e-17
RASSF8	1.49696	0.152178	9.83689	7.80876e-23
NECAB1	2.99926	0.209252	14.3332	1.35628e-46
PRDX4	-1.11459	0.110894	-10.0509	9.10247e-24
DDX39A	-1.60309	0.0991374	-16.1704	8.15708e-59
ADGRE5	2.48782	0.13598	18.2955	8.99552e-75
NLN	-1.33654	0.0946516	-14.1206	2.83522e-45
CENPK	-2.59962	0.122391	-21.2402	4.05874e-100
ITIH5	2.65282	0.263918	10.0517	9.0319e-24
NCKAP1L	1.90464	0.172716	11.0276	2.81255e-28
MMP19	2.61873	0.188724	13.876	8.851e-44
SPATS2	-1.33211	0.0691957	-19.2513	1.37586e-82
NR4A1	2.951	0.195596	15.0872	1.96545e-51
PDE1B	2.2186	0.141636	15.6641	2.66108e-55
HOXC13	-8.76349	0.334274	-26.2165	1.72517e-151
LRP1	1.15573	0.132644	8.71299	2.95962e-18
HOXC11	-8.27624	0.424663	-19.4889	1.36273e-84
NFE2	2.19605	0.23746	9.24809	2.28536e-20
HOXC12	-7.32899	0.623336	-11.7577	6.44772e-32
SMUG1	-1.13058	0.0746214	-15.1508	7.48063e-52
DBH	1.12842	0.210288	5.36605	8.04814e-08
STIL	-3.04223	0.0987876	-30.7956	2.99704e-208
HJURP	-4.5854	0.122224	-37.5164	4.97393e-308
COL10A1	-3.34096	0.234187	-14.2662	3.55436e-46
H2BFWT	-5.87167	0.418229	-14.0394	8.95053e-45
NRK	-1.83271	0.271534	-6.74948	1.48374e-11
METTL8	-1.43355	0.0894451	-16.0272	8.2582e-58
ACVR1C	-2.67313	0.184969	-14.4518	2.44317e-47
BATF3	1.15382	0.151747	7.60359	2.88037e-14
G0S2	1.20526	0.226875	5.31246	1.08156e-07
PFKFB2	1.14338	0.0887608	12.8816	5.71203e-38
C4BPA	3.4022	0.34615	9.82868	8.47196e-23
C4BPB	1.17266	0.340694	3.44198	0.000577462
RAB38	-2.23488	0.186701	-11.9704	5.07976e-33
GPR83	-1.30352	0.245355	-5.31281	1.07949e-07
MXD4	1.14597	0.0876425	13.0755	4.54541e-39
CKS2	-1.7265	0.13187	-13.0924	3.63877e-39
DAW1	2.75902	0.326357	8.454	2.81495e-17
CHPF	-1.21449	0.134124	-9.05498	1.36595e-19
INHA	-2.80441	0.227861	-12.3075	8.25082e-35
MOGAT1	3.40101	0.304969	11.152	7.00095e-29
FAM124B	2.3759	0.160349	14.8171	1.13662e-49
SLC12A4	1.17581	0.105817	11.1117	1.10039e-28
CTCFL	-5.8934	0.557137	-10.578	3.76891e-26
PI3	-6.05225	0.361386	-16.7473	5.92288e-63
SLPI	1.54706	0.24209	6.39043	1.65416e-10
WFDC3	-1.39674	0.234521	-5.95572	2.58937e-09
TTPAL	-1.03119	0.0867425	-11.888	1.36673e-32
PREX1	1.7443	0.140399	12.4239	1.93892e-35
ARHGAP40	-1.53573	0.29208	-5.2579	1.45707e-07
SDC4	1.40857	0.149691	9.40986	4.96797e-21
PARD6B	1.87921	0.120274	15.6244	4.96229e-55
PLCG1	-1.18157	0.0999554	-1.81647	0.0292988
TOX2	1.28219	0.177788	7.21192	5.51674e-13
GTSF1L	-2.09812	0.34	-6.17095	6.7883e-10
ZNFX1	1.05924	0.0884532	11.9752	4.79431e-33
ZNF831	1.15785	0.220952	5.24025	1.60359e-07
EDN3	1.01603	0.57187	1.77668	0.0756206
CSE1L	-1.49265	0.0772411	-19.3245	3.3398e-83
PTGIS	2.22502	0.198796	11.1925	4.43821e-29
SNAI1	1.18992	0.165444	7.19233	6.36955e-13
RBPJL	-1.31765	0.340029	-3.87512	0.000106572
C20orf85	3.03849	0.453534	6.6996	2.08995e-11
PCK1	-1.01118	0.469693	-2.15286	0.0313301
MAGEA10	-9.4259	0.559082	-16.8596	8.91872e-64
CHST8	-1.16909	0.308929	-3.78434	0.000154118
XG	-3.02914	0.252043	-12.0183	2.84682e-33
ATP8A1	2.52754	0.183921	13.7425	5.6478e-43
POF1B	-2.79906	0.237666	-11.7773	5.10986e-32
HIF3A	1.82056	0.289836	6.28134	3.35675e-10
LYPD3	-5.84295	0.230287	-25.3725	5.08055e-142
CEACAM8	5.32351	0.301856	17.6359	1.30588e-69
NDP	-1.86273	0.281112	-6.62627	3.44266e-11
CRISP2	1.73379	0.409228	4.23672	2.26804e-05
F13A1	1.4372	0.211135	6.807	9.96567e-12
GRM4	-4.65906	0.315724	-14.7567	2.7852e-49
PACSIN1	-1.63296	0.227302	-7.18411	6.76484e-13
SLC17A3	2.75022	0.348389	7.89412	2.92369e-15
SERPINB6	1.2839	0.115716	11.0953	1.32282e-28
XPO5	-1.40195	0.0850042	-16.4928	4.13624e-61
HIST1H1D	-2.75828	0.252207	-10.9365	7.70828e-28
MOCS1	1.61021	0.139684	11.5275	9.58652e-31
HIST1H2BJ	-2.60863	0.210758	-12.3774	3.46355e-35
OR2B6	-4.41058	0.351112	-12.5618	3.42617e-36
APOBEC2	1.60737	0.247067	6.5058	7.72793e-11
GNMT	1.51194	0.15431	9.79808	1.1475e-22
TREM1	2.7904	0.218766	12.7552	2.91685e-37
KLHL31	-1.08313	0.171206	-6.32646	2.50843e-10
SOX4	-1.59395	0.131163	-12.1525	5.56614e-34
KCNK17	2.22364	0.211837	10.4969	8.92315e-26
RIOK1	-1.06558	0.0825124	-12.9142	3.74288e-38
RPP40	-1.95722	0.102048	-19.1794	5.5038e-82
RUNX2	-1.38845	0.149646	-9.2782	1.72364e-20
LRRFIP1	1.20557	0.0908948	13.2633	3.77791e-40
RAB17	1.90632	0.213936	8.91073	5.06993e-19
CXCL6	-2.67106	0.33895	-7.88039	3.26351e-15
MYRF	3.54266	0.1838	19.2746	8.78295e-83
SCGB2A1	1.71304	0.347635	4.92769	8.32068e-07
AHNAK	1.51252	0.132332	11.4297	2.97001e-30
GOT2	-1.11088	0.0886611	-12.5295	5.14741e-36
DOK4	1.48537	0.100524	14.7763	2.08371e-49
PIWIL1	-3.5109	0.487468	-7.20231	5.91992e-13
SOX21	-4.96715	0.271875	-18.27	1.43536e-74
C17orf53	-3.46823	0.118453	-29.2795	1.89275e-188
IRF1	1.12799	0.142019	7.94249	1.98163e-15
UPF3B	-1.15026	0.0921535	-12.482	9.36062e-36
PTGER2	1.82489	0.191754	9.51687	1.78481e-21
SOX9	-1.90913	0.203484	-9.38218	6.46221e-21
TEKT3	2.46793	0.192448	12.8238	1.20573e-37
MYH2	3.73558	0.366833	10.1833	2.35382e-24
NUP85	-1.005	0.0690537	-14.5539	5.51651e-48
MSTO1	-1.13914	0.0858071	-13.2756	3.20818e-40
C1orf61	-3.92462	0.335191	-11.7086	1.15163e-31
KIR2DL1	2.63373	0.313487	8.40139	4.41211e-17
SRMS	-1.69436	0.232895	-7.27523	3.45828e-13
IL1B	1.02776	0.229231	4.48351	7.3425e-06
CD70	-1.78871	0.288434	-6.20146	5.59416e-10
C3	1.97921	0.185159	10.6892	1.14326e-26
TNFSF14	1.73151	0.171405	10.1018	5.42175e-24
FOSB	4.07373	0.270944	15.0353	4.3095e-51
SNRPD2	-1.1037	0.101684	-10.8543	1.90312e-27
SDCBP2	-1.35844	0.207477	-6.54746	5.85238e-11
TGM3	-3.662	0.396456	-9.23686	2.53842e-20
GNRH2	-1.10452	0.228023	-4.8439	1.27313e-06
DEFB126	-5.87111	0.42683	-13.7552	4.74225e-43
FOXA2	3.3096	0.298458	11.089	1.41873e-28
CD93	3.09788	0.150546	20.5776	4.35388e-94
PAX1	-3.84786	0.453798	-8.47925	2.26645e-17
CSTL1	-5.17487	0.400505	-12.9209	3.43201e-38
SNRPB	-1.38803	0.0897526	-15.465	5.97531e-54
BMP2	2.34647	0.199665	11.752	6.89301e-32
FLRT3	2.63828	0.239183	11.0304	2.72632e-28
PCSK2	1.1611	0.430534	2.69688	0.00699927
LAMP5	-1.45618	0.233203	-6.24423	4.25891e-10
MGME1	-1.78057	0.0842712	-21.129	4.30204e-99
LRRN4	4.27921	0.268891	15.9143	5.04229e-57
TCF15	-1.39495	0.251292	-5.5511	2.83875e-08
MCM8	-2.20264	0.0995185	-22.133	1.52077e-108
TMEM74B	1.31211	0.189912	6.90906	4.8786e-12
SIRPD	2.96376	0.202789	14.615	2.253e-48
MRPS26	-1.15967	0.0949547	-12.2129	2.65364e-34
S1PR4	2.3586	0.171546	13.7491	5.15666e-43
GDF5	1.3671	0.281055	4.86415	1.14948e-06
MMP24	2.9852	0.176293	16.9331	2.56348e-64
FAM83C	-7.76657	0.369973	-20.9922	7.72175e-98
BPIFB1	1.55007	0.428397	3.6183	0.000296548
CEP250	-1.01555	0.115526	-8.79061	1.48748e-18
XRCC3	-1.36986	0.110863	-12.3563	4.50481e-35
F10	2.60467	0.18149	14.3516	1.04084e-46
PROZ	-1.81111	0.243201	-7.44697	9.55109e-14
SLURP1	-5.47647	0.463657	-11.8115	3.40611e-32
PDCD2L	-1.68195	0.112569	-14.9415	1.7687e-50
KIRREL2	-3.67492	0.338704	-10.8499	1.99548e-27
UBA2	-1.09108	0.0940742	-11.5981	4.21393e-31
FFAR2	1.27289	0.259892	4.89779	9.69205e-07
HCST	1.55101	0.160783	9.6466	5.08132e-22
KRT36	-2.56677	0.299561	-8.56842	1.04916e-17
THRA	1.15382	0.0969835	11.8971	1.22596e-32
BCL2L12	-1.5039	0.0916549	-16.4083	1.66677e-60
RRAS	1.58294	0.133534	11.8542	2.04643e-32
FLRT1	-2.47244	0.233844	-10.573	3.97503e-26
STATH	-5.93635	0.626024	-9.48262	2.47977e-21
STAT5A	1.25717	0.124336	10.111	4.93792e-24
WNK4	-1.38182	0.293274	-4.71169	2.45666e-06
PRKCG	-2.17387	0.310214	-7.00766	2.42333e-12
TRAP1	-1.33466	0.0847159	-15.7545	6.39143e-56
GLIS2	1.07371	0.136402	7.87168	3.4992e-15
DACH2	-1.12343	0.351074	-3.2	0.0013743
CFP	2.80226	0.173085	16.1901	5.9277e-59
SIX1	-2.2115	0.169819	-13.0227	9.08746e-39
RHOJ	2.69184	0.134033	20.0834	1.03167e-89
DLGAP5	-4.18691	0.121417	-34.4839	1.40014e-260
PLEKHG3	-1.61229	0.130303	-12.3734	3.64218e-35
PZP	2.47783	0.282675	8.76566	1.85689e-18
EVI2A	1.2461	0.183685	6.7839	1.16971e-11
OMG	2.62531	0.25761	10.191	2.17483e-24
AIF1L	1.02995	0.174156	5.91396	3.33979e-09
FAM78A	1.3243	0.146173	9.05978	1.30716e-19
CTAG2	-8.04719	0.719363	-11.1865	4.74548e-29
AVPR2	2.7107	0.21001	12.9075	4.08299e-38
ARMCX1	1.14642	0.14629	7.83662	4.62853e-15
TIMM8A	-1.59689	0.0962397	-16.5928	7.85133e-62
ZC4H2	1.36333	0.174913	7.79433	6.47515e-15
RGS13	2.23186	0.243172	9.17813	4.38651e-20
IPPK	-1.13841	0.113255	-10.0517	9.02849e-24
FGD3	1.39988	0.121093	11.5604	6.5402e-31
EDN2	-1.83316	0.317203	-5.77913	7.50897e-09
BCL11B	-1.66001	0.180191	-9.21252	3.18569e-20
MASP1	2.53159	0.254292	9.95546	2.38708e-23
ATP13A4	2.73413	0.252967	10.8083	3.14551e-27
HRASLS	-4.20686	0.249854	-16.8373	1.30043e-63
BEST3	-3.87709	0.44628	-8.68757	3.70288e-18
PTPRB	3.61177	0.142664	25.3165	2.10205e-141
YEATS4	-1.25224	0.114564	-10.9304	8.24447e-28
CRYGN	-1.5331	0.229878	-6.66921	2.57179e-11
AUNIP	-3.67014	0.119124	-30.8093	1.96486e-208
PLA2G5	1.87075	0.172743	10.8297	2.48999e-27
KLF2	3.08602	0.160194	19.2643	1.07107e-82
OR7C1	-3.77989	0.374261	-10.0996	5.54684e-24
F2RL3	2.68503	0.172695	15.5478	1.64646e-54
SYNGR3	-2.15043	0.215862	-9.96202	2.23472e-23
PKMYT1	-4.10162	0.126932	-32.3137	4.49511e-229
CHTF18	-2.49294	0.127768	-19.5115	8.7676e-85
GNG13	-2.14744	0.352383	-6.09406	1.10081e-09
MACF1	1.53866	0.111983	13.7402	5.83241e-43
TUBA4A	-1.20939	0.152682	-7.92097	2.35667e-15
VIL1	-3.72225	0.384096	-9.69095	3.29451e-22
ZNF835	1.58309	0.205233	7.7136	1.22316e-14
GNG11	3.04279	0.161218	18.8738	1.87335e-79
SEM1	-1.54362	0.102622	-15.0418	3.90819e-51
GNGT1	-7.80418	0.271682	-28.7254	1.83813e-181
HIP1	1.2123	0.101666	11.9244	8.83176e-33
FGL2	1.41097	0.183742	7.67909	1.60229e-14
STEAP4	3.29807	0.252694	13.0517	6.21855e-39
MTERF1	-1.28976	0.102273	-12.6109	1.8377e-36
SGCE	1.23623	0.165664	7.46224	8.50618e-14
LRFN1	-1.78813	0.163602	-10.9298	8.30406e-28
ZFP36	2.47085	0.161444	15.3047	7.1141e-53
SPINK2	-1.69101	0.282297	-5.99018	2.09611e-09
RASL11B	-1.67959	0.191681	-8.76243	1.91087e-18
PAICS	-2.22161	0.110402	-20.123	4.64543e-90
KDR	2.6103	0.143071	18.2448	2.27513e-74
PPAT	-2.20925	0.10869	-20.3261	7.55486e-92
ADM2	-2.74561	0.174208	-15.7605	5.81306e-56
ASPHD2	-1.23729	0.121139	-10.2138	1.71929e-24
GAL3ST1	1.36971	0.234128	5.85024	4.90852e-09
RFPL1	-3.50844	0.472818	-7.42028	1.16871e-13
MGAT3	2.0104	0.256286	7.84435	4.35216e-15
A4GALT	-1.44993	0.176312	-8.22365	1.97393e-16
APOL3	1.77598	0.163969	10.8312	2.44803e-27
BAIAP2L2	-3.45274	0.195508	-17.6603	8.47795e-70
GALR3	-2.75926	0.38223	-7.21885	5.24273e-13
IGLL1	-2.26512	0.343066	-6.60258	4.04072e-11
LIF	1.7689	0.211679	8.35651	6.46004e-17
KRT17	-6.6406	0.252679	-26.2808	3.18169e-152
CPA4	-3.24034	0.339458	-9.54564	1.35267e-21
DOCK4	2.33868	0.123246	18.9757	2.70964e-80
CDHR3	2.51363	0.224668	11.1882	4.65776e-29
VGF	-3.31234	0.305077	-10.8574	1.83925e-27
PODXL	1.8739	0.149409	12.5421	4.39033e-36
STRIP2	-1.56346	0.178355	-8.766	1.85125e-18
FLNC	1.31518	0.216559	6.07309	1.25469e-09
CCDC136	-1.21735	0.202607	-6.00844	1.87319e-09
SMO	-2.43782	0.159338	-15.2997	7.68453e-53
FEZF1	-6.15241	0.333625	-18.4411	6.15044e-76
MRPS12	-1.70923	0.116336	-14.6922	7.23153e-49
MYO1B	1.0479	0.116728	8.97724	2.77638e-19
MTX2	-1.11037	0.0746131	-14.8817	4.33473e-50
PDE11A	-1.74557	0.273315	-6.38664	1.69566e-10
GAD1	-4.25197	0.259709	-16.3721	3.02803e-60
HOXD9	-1.93931	0.218333	-8.88233	6.54754e-19
HOXD10	-5.25898	0.274554	-19.1546	8.86049e-82
HOXD11	-8.97115	0.385289	-23.2842	6.40821e-120
HOXD13	-9.5494	0.441612	-21.624	1.06868e-103
WDFY4	1.86938	0.193382	9.66678	4.17314e-22
MYO5C	1.6972	0.146074	11.6187	3.31001e-31
CGNL1	3.17421	0.168978	18.7847	1.0074e-78
DLL4	2.19581	0.126829	17.3132	3.74032e-67
ALDH1A2	3.02787	0.226616	13.3612	1.01842e-40
KNSTRN	-2.00823	0.0943376	-21.2877	1.47714e-100
CHAC1	-1.68526	0.152132	-11.0776	1.6107e-28
LOXL1	-1.05165	0.151206	-6.95508	3.52352e-12
ACKR4	2.9723	0.162129	18.333	4.51676e-75
BBOX1	-2.35134	0.252002	-9.33065	1.05225e-20
MYOD1	-6.80284	0.609426	-11.1627	6.208e-29
KCNC1	-2.90846	0.326942	-8.89593	5.79341e-19
[truncated: 4,514 more rows]
